# Supplementary material for: Step-by-Step Replacement of Cyano Groups by Tricyanovinyls—The Influence on the Acidity
Source: MDPI journal article supplement (doi:10.3390/molecules28248157), 2023-12-18
Supplement: s1 [file s1]

# SUPPLEMENTARY MATERIAL

of the Article

## Step-by-Step Replacement of Cyano Groups by Tricyanovinyls – The Influence on the Acidity

Agnes Kütt

Institute of Chemistry, University of Tartu, Ravila 14A, Tartu, 50411, Estonia; agnes.kutt@ut.ee

### 1. Materials and Methods

#### 1.1. Computational Gas-phase acidities

All electronic structure calculations in this study were performed with the quantum chemical program package Turbomole version 7.2 or Gaussian 16.

For all the compounds, frequency calculations were carried out to check for the presence of imaginary frequencies. These may indicate that found geometry corresponds to a transitional state rather than energy minimum. However, small negative frequencies may be an artifact of computational procedure. In some cases, imaginary frequencies were found, and geometries were adjusted and reoptimized to eliminate or reduce them. It was found that the effect of such corrections on the computed GA values was negligible.

Calculating the molecule as a cycle where the proton is attached between two CN groups did not lead to any stable species. During the geometry optimization, the ring is broken, or a structure with imaginary frequencies is obtained.

In the case of Gaussian B3LYP/6-311+G(d,p) results, the  $H$  and  $G$  values come straight from the output as "Sum of electronic and thermal Enthalpies" and "Sum of electronic and thermal Free Energies", respectively. In the case of G4(MP2) method, the  $H$  and  $G$  value comes from the output as "G4MP2(0 K)" and "G4MP2 Energy", respectively. W1RO and CBS-APNO final energies come from Gaussian outputs as "W1RO Enthalpy" and "W1RO Free Energy", and "CBS-APNO Enthalpy" and "CBS-APNO Free Energy", respectively. Gaussian calculations are performed at the temperature 298.2 K and at the pressure 1.0 atm.

In the case of Turbomole results, the  $H$  and  $G$  values need to be calculated for every species according to equations 2-3. Thermochemical properties (Enthalpy and Chemical potential) are available from the frequency calculations, where the following parameters are used: temperature 298.15 K, pressure 0.1 MPa, frequency scale 0.9914, sigma 1.0, symmetry C1.

$$H = \text{total energy} + \text{Enthalpy} \quad (\text{S1})$$

$$G = \text{total energy} + \text{Chemical potential} \quad (\text{S2})$$

Then, PA and GA are calculated as follows:

$$\text{PA} = H(\text{A}^-) + H(\text{H}^+) - H(\text{AH}) \quad (\text{S3})$$

$$\text{GA} = G(\text{A}^-) + G(\text{H}^+) - G(\text{AH}) \quad (\text{S4})$$

Where values for proton are:  $H(\text{H}^+) = 1.481$  kcal/mol;  $G(\text{H}^+) = -6.275$  kcal/mol.

### 1.2. Computational solution phase acidities

Acidities in the solution were estimated using either a correlation between  $pK_a$  values in two solvents or values computed with the COSMO-RS method and corrected using the available experimental data for similar compounds. The auxiliary acids that were chosen to correct computational  $pK_a$  values are all cyanocarbon acids measured in 1,2-dichloroethane (DCE). The obtained results are summarized in Table 4 in the main text and Table S8.

The COSMO-RS files were calculated for all the conformers of anions and all the conformers/isomers of the most stable tautomer of neutral form. For this, two sequenced COSMO calculations were performed. First, the structure was optimized in the ideal conductor using the BP86/def-TZVP basis set, and then the COSMO file with the FINE cavity parameter was calculated using the BP86/def2-TZVPD method. Using obtained cosmo files, a conformer set was created for anion and neutral species, and  $pK_a$  values in MeCN, DMSO, and H<sub>2</sub>O were calculated using COSMOtherm software with parametrization BP\_TZVPD\_FINE\_19. All unique conformers were considered. The conformational search was conducted only for anion **14** with COSMOconf software using BP-TZVP-GAS methods.

$pK_a$ (DMSO) values in the current work are obtained from  $pK_a$ (MeCN) values by averaging two different values calculated from previously published  $pK_a$ (MeCN) vs  $pK_a$ (DMSO) correlation equations.[34,42 in the main text] Also, COSMO-RS  $pK_a$ (DMSO) values are available in Table S8. To correlate the assigned  $pK_a$ (DMSO) values with  $pK_a$ (DMSO) COSMO-RS values, a very good correlation is obtained, however, the values themselves deviate from each other. The equation is as follows:

$$pK_a(\text{DMSO}) \text{ ASSIGNED} = 1.299(0.015) \cdot pK_a(\text{DMSO}) \text{ COSMO-RS} - 0.63(0.20) \quad (\text{S5})$$
$$r^2=0.998; S=0.685; n=19$$

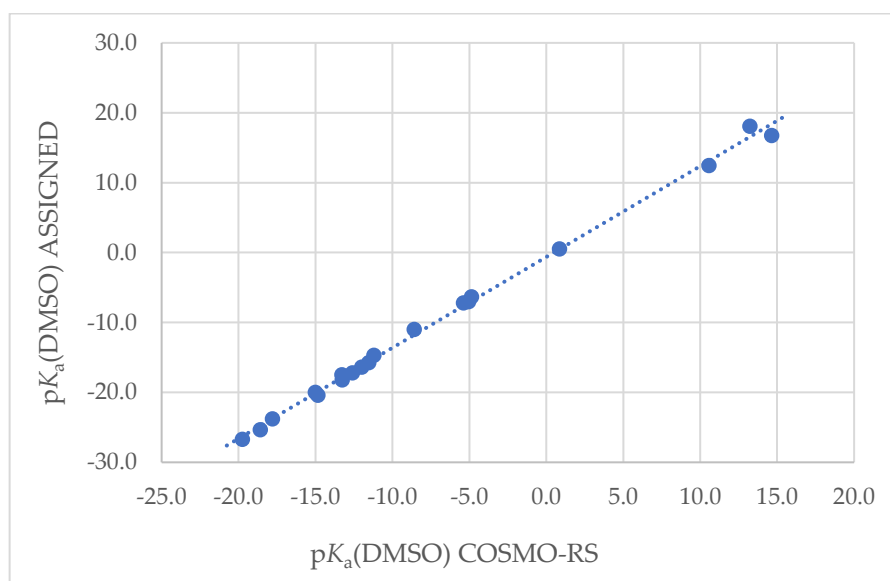

**Figure S1.** Correlation between  $pK_a$ (DMSO) values listed in Table S4 and computationally obtained COSMO-RS  $pK_a$ (DMSO) values according to Eq S5.

### 1.3. Structural Details

In the following sections, in comparison of energies of different tautomers and conformers, only data from calculations of BP86/def-TZVP basis set are used because other methods were not used to calculate the less stable forms. *Relative Gibbs free energy values* ( $\Delta G$ ) in the gas-phase are provided to compare the stability of different tautomers and conformers. The reader must note that it is not the GA value.

#### 1.3.1. Central atom O

Divalent oxygen substituted with the CN group exhibits two tautomers: OH-acid (cyanic acid, **1H-T1**) and NH-acid (isocyanic acid **1H-T2**, Figure 7 in the main text). The replacement of the CN group with the TCNV group gives a structure with five possible tautomers (Figure S2). The most stable form is OH-acid, tautomer **T1**.

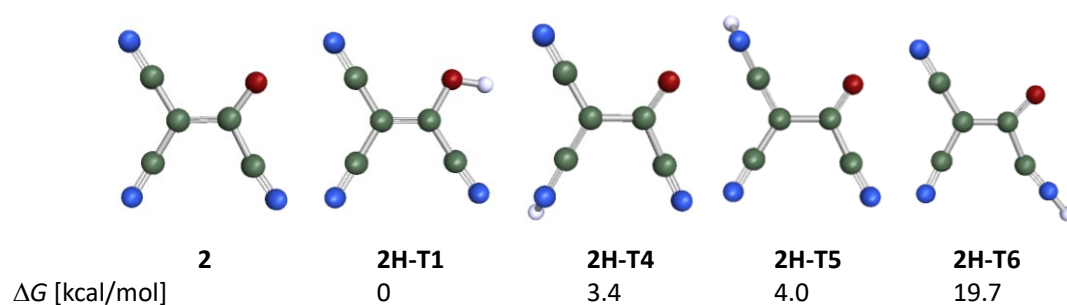

**Figure S2.** Geometries of **2** and its conjugate acids in different tautomeric forms with their  $\Delta G$  values compared to the most stable **2H-T1**.

Anion **2** is planar. Tautomers **T1**, **T4-T5** are also planar, except the proton is bent out of the plane. In the case of **T6**, the C-N-H angle is almost straight ( $177^\circ$ ), but the C-C-N angle, where the proton is attached, is slightly bent ( $161^\circ$ ). The whole molecule, however, is fully planar.

Tautomers **T4** and **T5** have a similar energy, **T4** is 0.6 kcal/mol more stable. These tautomers are, respectively, 3.4 and 4.0 kcal/mol less stable than the most stable **T1**. The least stable form is **T6**, which is 19.7 kcal/mol less stable than **T1**. Tautomer **T3**, CH-acid, has different conformers since the possibility to rotate about the C-C bond. Two conformers are computationally archivable: *syn*(H) form and *eclipsed*(H) form (Figure S3). *Syn*(H) form is the most stable among CH-acids, 0.2 kcal/mol more stable than *eclipsed*(H) form. *Anti*(H) is not possible to obtain during structure optimization; however, when the torsion angle is frozen ( $179^\circ$ ) during the optimization, we obtain the structure which is 2.8 kcal/mol less stable than *syn*(H) form (imaginary frequencies are not zero). **T3** *syn*(H) form is 6.8 kcal/mol less stable than the most stable **2H-T1**.

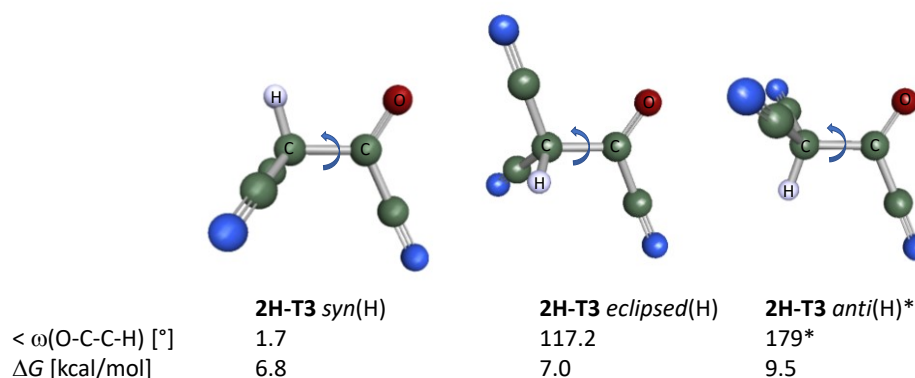

**Figure S3.** Three different conformers of compound **2H-T3** and their  $\Delta G$  values compared to the most stable **2H-T1**. \**Anti*(H) is not a stable conformer for this compound, having imaginary frequencies. Torsion angles ( $\angle \omega$ ) of O-C-C-H are presented.

### 1.3.2. Central atom N

The most stable tautomer of dicyanamine has a proton attached to the CN group nitrogen, tautomer **T2** (Figure 7 in the main text).

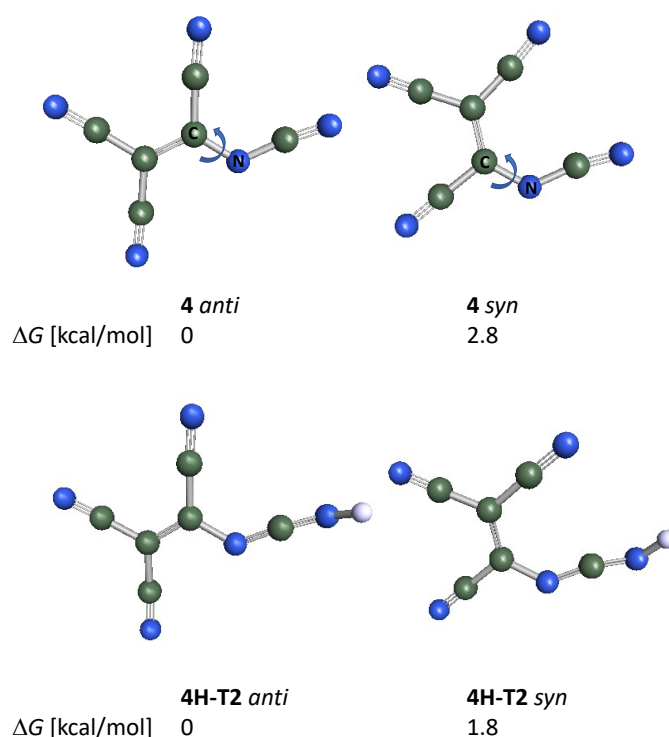

**Figure S4.** Geometry of **4** and its most stable tautomers **4H-T2**.

Its TCNV substituted analog, anion **4**, and its conjugate acids, **4H-T1**, **4H-T2**, and **4H-T6**, can be in *anti* and *syn* conformation. Acids **4H-T3**, **4H-T4**, and **4H-T5** exhibit *trans* and *cis* isomers (Figure S4). *Syn* and *cis* forms are less stable, most probably because of the repulsion between CN and TCNV groups. Anions in *anti* and *syn* conformation are fully planar. Acid forms, except tautomer **T3**, CH-acid, are also planar; only the proton is bent out of the plane. Acid **4H-T3**, differently from **2H-T3**, the *anti*(H) form is also stable; however, the lowest energy is obtained for *syn*(H) conformer (Table S1).

**Table S1.**  $\Delta G$  values (kcal/mol) of the most stable conformers of different tautomers for compound **4H**, relative to the **4H-T2 anti** conformer at BP86/def-TZVP level.

| <b>4H-T2 anti</b> | <b>4H-T1 anti</b> | <b>4H-T4 trans</b> | <b>4H-T5 trans</b> | <b>4H-T3</b><br><i>trans-syn</i> (H) | <b>4H-T6 anti</b> |
|-------------------|-------------------|--------------------|--------------------|--------------------------------------|-------------------|
| 0                 | 6.7               | 15.0               | 15.2               | 18.9                                 | 32.0              |

The most stable form for anion **5** is the *anti-anti* conformation. The most stable acid form is **T1**, i.e., the proton attached to the central nitrogen atom. Again, three different conformers (*anti-anti*, *anti-syn*, *syn-syn*) for anion and **4H-T1** (Figure S5), and four different conformers/isomers for other protonated forms can be envisaged. Tautomer **T3**, the CH-acid, has again many possibilities to rotate about C-C bond. 8 different conformers are calculated for **T3** tautomer, *trans-anti-syn*(H) is the most stable form (Table S2).

While anion **4** is fully planar molecule, then anion **5** is not planar. Each TCNV group is planar, the C-N-C angles and the angles between two planes formed from each TCNV group's nitrogen atoms, are the higher the more sterically congested the molecule is (Figure 11).

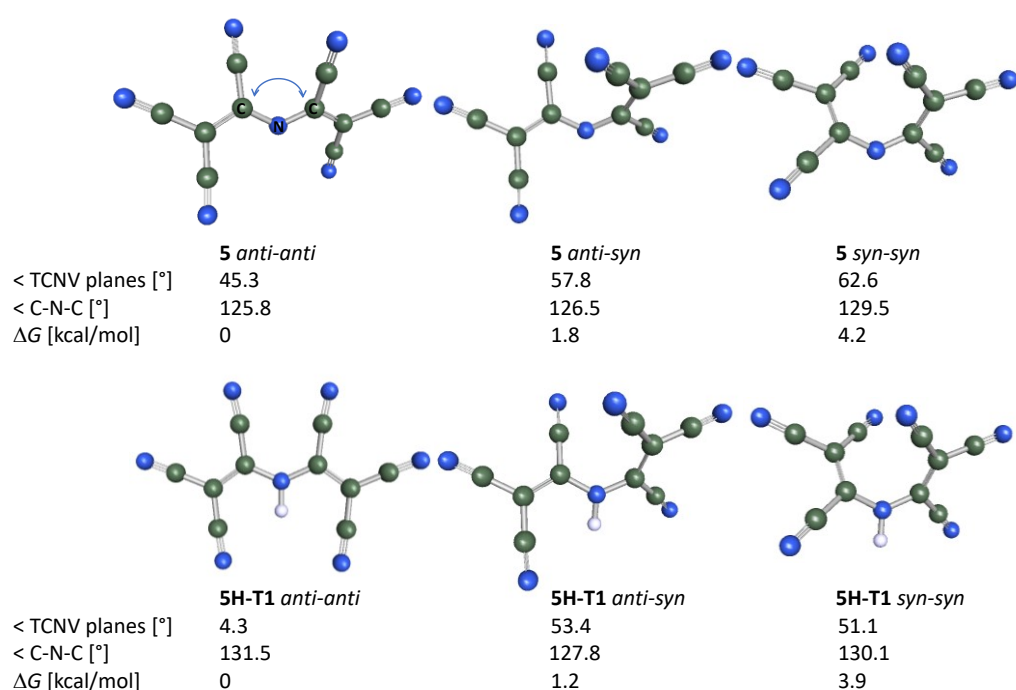

**Figure S5.** Geometries of three different conformers of anion **5**. The angle between planes composed with N atoms of TCNV groups and bent between C-N-C atoms are presented. The tautomer **T1** as the most stable acid form with the same parameters are brought.

**Table S2.** ΔG values (kcal/mol) of the most stable conformers of different tautomers for compound **5H**, relative to the **5H-T1 anti-anti** conformer at BP86/def-TZVP level.

| <b>5H-T1</b><br><i>anti-anti</i> | <b>5H-T5</b><br><i>trans-anti</i> | <b>5H-T4</b><br><i>trans-anti</i> | <b>5H-T3</b><br><i>trans-anti-syn(H)</i> | <b>5H-T6</b><br><i>anti-anti</i> |
|----------------------------------|-----------------------------------|-----------------------------------|------------------------------------------|----------------------------------|
| 0                                | 9.1                               | 10.1                              | 14.3                                     | 24.8                             |

### 1.3.3. Central atom C

Replacement of one CN group in cyanoform **6H** with one TCNV group leads to a long-known pentacyanopropene **7H** (Figure S6). The anion **7** and **T6** tautomer of the neutral acid is practically planar (H is bent out of plane 16°). Tautomer **T2** (also **T4** and **T5**) is generally planar, the protonated CN group slightly bent (9–10°) and N-H bond bent out of plane (53°). Tautomer **7H-T3** has stable *syn(H)* and *anti(H)* forms, but the *eclipsed(H)* form is not computationally achievable.

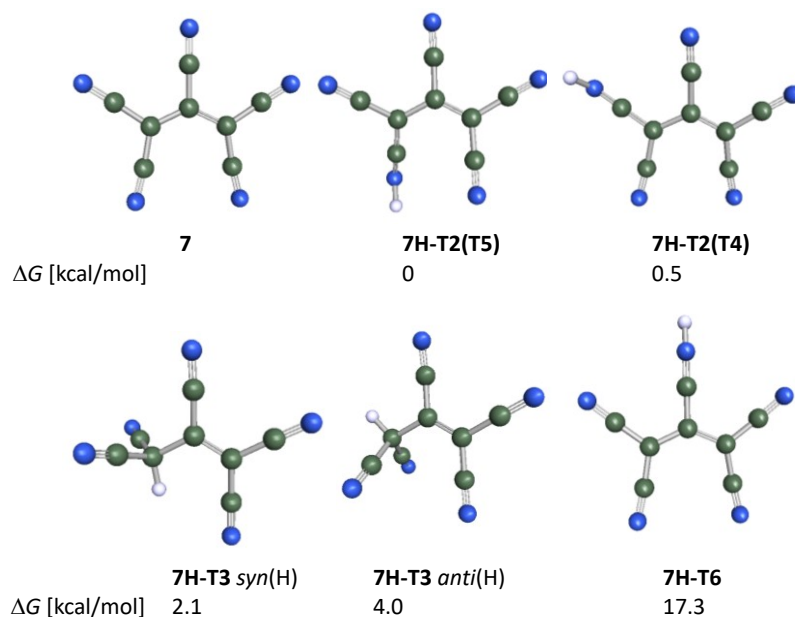

**Figure S6.** Geometries of **7** and its conjugate acids with their  $\Delta G$  values with respect to the most stable **T2(T5)** tautomer.

Second replacement of CN group with TCNV group leads to an anion **8** (Figure S7). Similarly, to N-centered **5**, placing CN group downwards, *syn-syn*, *syn-anti*, and *anti-anti* conformers can be envisaged. Differently from **5**, not an *anti-anti* conformer but the *anti-syn* conformer has the lowest energy while the *anti-anti* form is the least stable one, however, the differences are minor. The torsion angle between TCNV groups (measured as an angle between the planes composed of N atom of TCNV group,  $\angle$  TCNV group) is not consistent with the stability. **8H-T2** tautomer with *anti-syn* conformation is the most stable acid form. The plane using three C atoms around central atom C has been composed and the distance of the central atom C from the plane has been measured (d C-CCC plane), which shows the planarity of the central part of the structure. We can see that the central part is practically planar.

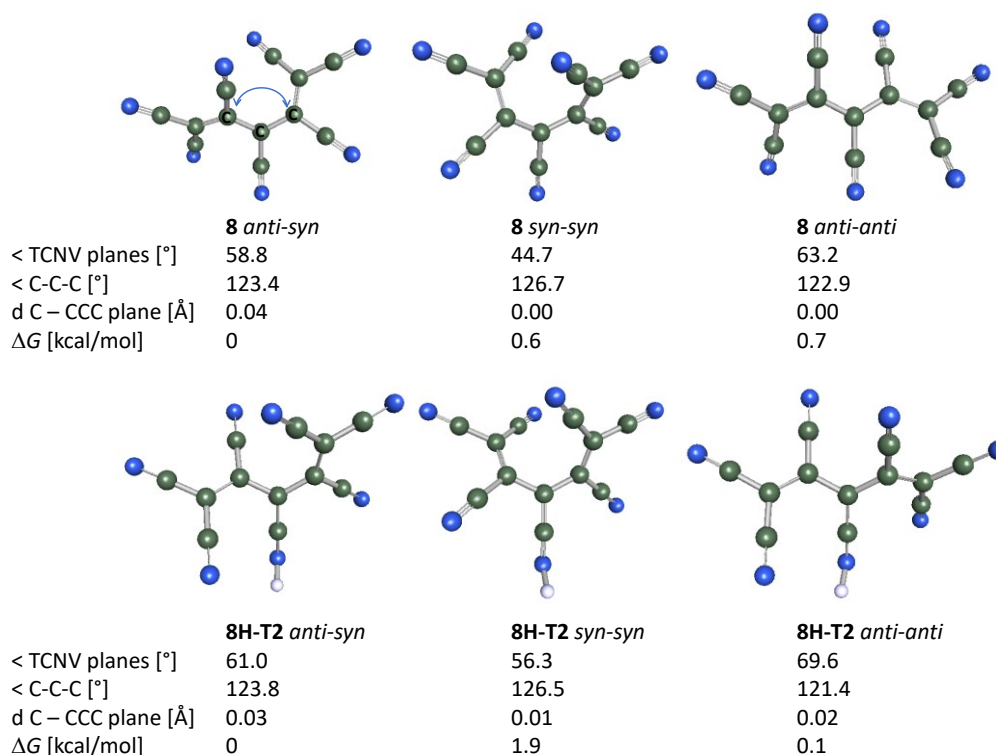

**Figure S7.** Different conformers of anion **8** and acid form **8H-T2**.

In Table S3 the stability of tautomers of the most stable conformers are available. The differences between different tautomers become smaller compared to the above presented compounds the more TCNV groups the compound incorporates.

**Table S3.**  $\Delta G$  values (kcal/mol) of the most stable conformers of different tautomers for compound **8H**, relative to the **8H-T2** *anti-syn* conformer at BP86/def-TZVP level.

| <b>8H-T2</b><br><i>anti-syn</i> | <b>8H-T5</b><br><i>trans-syn</i> | <b>8H-T4</b><br><i>trans-syn</i> | <b>8H-T1</b><br><i>anti-syn</i> | <b>8H-T3</b><br><i>trans-syn-syn(H)</i> | <b>8H-T6</b><br><i>anti-syn</i> |
|---------------------------------|----------------------------------|----------------------------------|---------------------------------|-----------------------------------------|---------------------------------|
| 0                               | 1.5                              | 2.6                              | 4.0                             | 4.4                                     | 16.2                            |

The third replacement of CN group by TCNV group gives the compound **9** with altogether 9 CN groups (Figure S8). In the case of all C-centered anions, also in this case, the central atom C is practically on the same plane as its neighboring C-atoms, therefore, two different anions can be envisaged, the lower energy symmetrical and 2.0 kcal/mol higher energy asymmetrical.

|                       |                                                                                     |                                                                                      |
|-----------------------|-------------------------------------------------------------------------------------|--------------------------------------------------------------------------------------|
|                       | 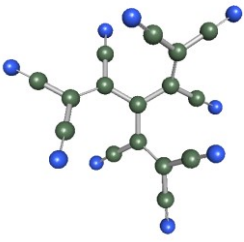  |   |
|                       | <b>9 symmetrical</b>                                                                | <b>9 asymmetrical</b>                                                                |
| < C-C-C [°]           | 119.9<br>119.9<br>119.9                                                             | 118.7<br>118.8<br>122.6                                                              |
| d C – CCC plane [Å]   | 0.05                                                                                | 0.02                                                                                 |
| $\Delta G$ [kcal/mol] | 0                                                                                   | 2.0                                                                                  |
|                       |  |  |
|                       | <b>9H-T1 anti-anti-anti</b>                                                         | <b>9H-T1 syn-syn-syn</b>                                                             |
| < C-C-C [°]           | 112.0<br>112.1<br>111.9                                                             | 115.4<br>115.5<br>115.5                                                              |
| d C – CCC plane [Å]   | 0.44                                                                                | 0.33                                                                                 |
| $\Delta G$ [kcal/mol] | 0                                                                                   | 8.3                                                                                  |

**Figure S8.** Anions **9** with its two conformers and the most stable conjugate acid forms **9H-T1**.

The most stable acid form, **T1**, is slightly more tetrahedron-like, with smaller C-C angle and seemingly higher distance of the central atom from the plane composed its neighbouring C-atoms. The stability of different tautomers shows that **T1**, **T4** and **T5** tautomers have similar energies (Table S4) and very close GA values (see Table S9). **T6** tautomer comes also energetically closer to other tautomers.

**Table S4.**  $\Delta G$  values (kcal/mol) of the most stable conformers of different tautomers for compound **9H**, relative to the **9H-T1** *anti-anti* conformer at BP86/def-TZVP level.

| <b>9H-T1</b><br><i>symmetrical</i><br><i>anti-anti-anti</i> | <b>9H-T4</b><br><i>symmetrical</i><br><i>trans-anti-anti</i> | <b>9H-T5</b><br><i>symmetrical</i><br><i>trans-anti-anti</i> | <b>9H-T3</b><br><i>symmetrical</i><br><i>trans-anti-anti-<br/>syn(H)</i> | <b>9H-T6</b><br><i>symmetrical</i><br><i>anti-anti-anti</i> |
|-------------------------------------------------------------|--------------------------------------------------------------|--------------------------------------------------------------|--------------------------------------------------------------------------|-------------------------------------------------------------|
| 0                                                           | 1.7                                                          | 3.0                                                          | 7.9                                                                      | 13.3                                                        |

#### 1.3.4. Central atom B

**T1** and **T3** tautomers of any boron containing compounds were not achievable computationally, resulting trivalent boron compounds.

Tetracyanoborate, a tetrahedral anion (Figure 7 in the main text), can be replaced with up to four TCNV groups while the configuration stays close to tetrahedron. The angles between bulky TCNV groups, depending on their conformation, are generally somewhat higher compared to the angles between CN groups.

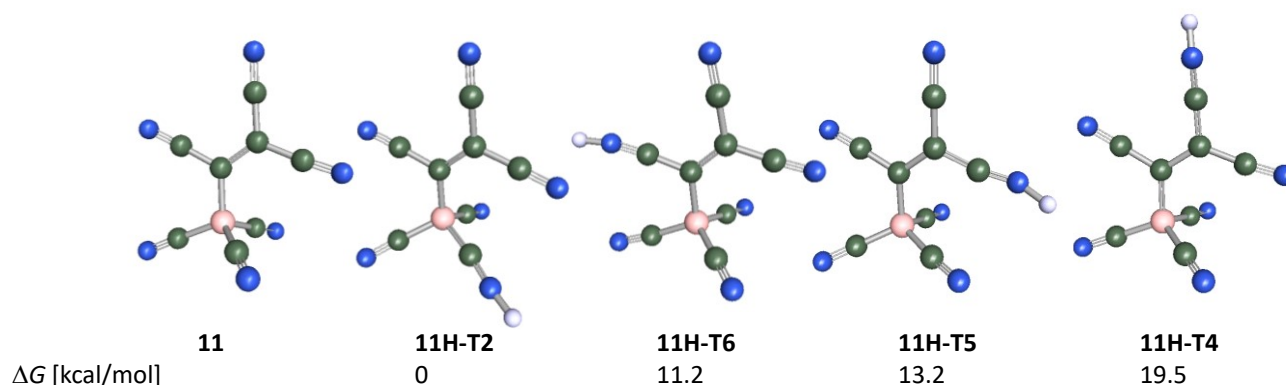

**Figure S9.** Anion **11** and its different tautomers of conjugate acids.

The most stable tautomer of acid **11H** (Figure S9) is the **T2** tautomer. Three different **T2** tautomers were calculated for each conformation. Differently from O-, N- and C-centered acids, **T6** tautomer is more stable than **T4** and **T5** tauomers.

The second replacement of the CN group with the TCNV group leads to an anion (**12**) where three different conformers can be envisaged (Figure S10). Differently from **5**, where *anti-anti*, and from **8**, where *anti-syn* were the most stable conformers, in the case of **12**, most probably because of an additional repulsion from CN groups, the *syn-syn* conformer is the most stable form. Very close is the *anti-syn* conformer in its stability. Two different **T2** tautomers were calculated for each anion, whereas the *anti-syn* form gave the lowest GA value because its protonated form has the highest stability. Again, as shown in Figure 5 in the main text and Table S5, **T6** tautomers are close to **T5** tautomers in their stability. To compare the structures with anions whose central atoms are N (**5**) and C (**8**) atoms, we can see that the C-X-C angle has the smallest value. This comes from the tetrahedral configuration of borates. For anions **5** and **8**, these angles have very similar values being in the range of 123–130 degrees, being the smallest for *anti-anti* conformers and the largest for *syn-syn* conformers.

**Table S5.**  $\Delta G$  values (kcal/mol) of the most stable conformers of different tautomers for compound **12H**, relative to the **12H-T2** *anti-syn* conformer at BP86/def-TZVP level.

| <b>12H-T2</b><br><i>anti-syn</i> | <b>12H-T6</b><br><i>syn-anti</i> | <b>12H-T5</b><br><i>trans-syn</i> | <b>12H-T4</b><br><i>trans-syn</i> |
|----------------------------------|----------------------------------|-----------------------------------|-----------------------------------|
| 0                                | 10.5                             | 13.2                              | 17.6                              |



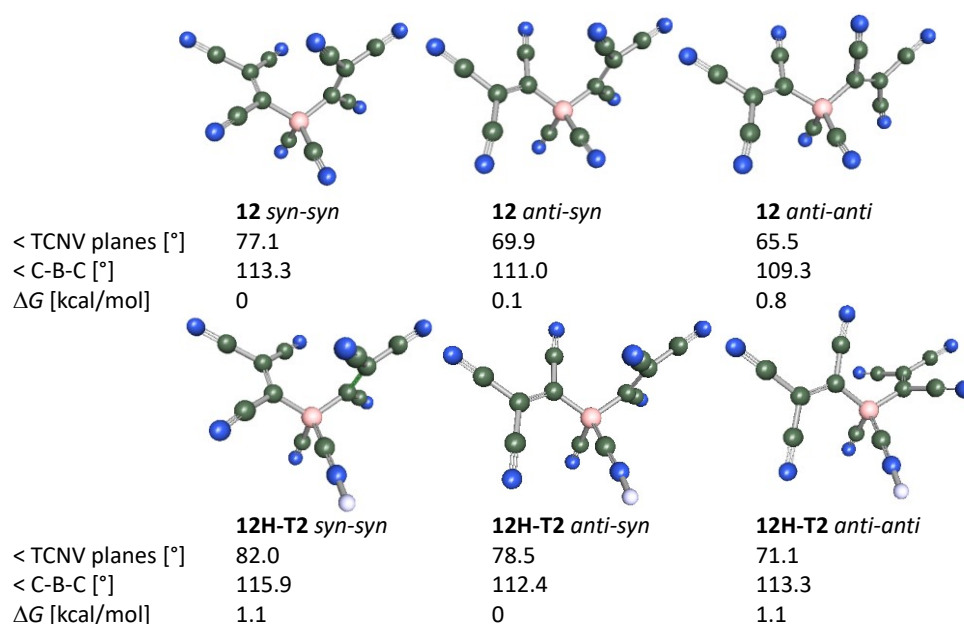

**Figure S10.** Three conformers of anion **12** and acid **12H-T2** with their  $\Delta G$  values. The angle between TCNV planes and C-B-C atoms is indicated.

The third replacement of the CN group with the TCNV group gives large-sized anion **13** with four different conformers. Their stability is not too different; however, the most congested *syn-syn-syn* form is the least stable. *Anti-anti-anti* **13H-T2** is the most stable acid form, leaving the second stable **T6** tautomer behind more than 10 kcal/mol (Table S6).

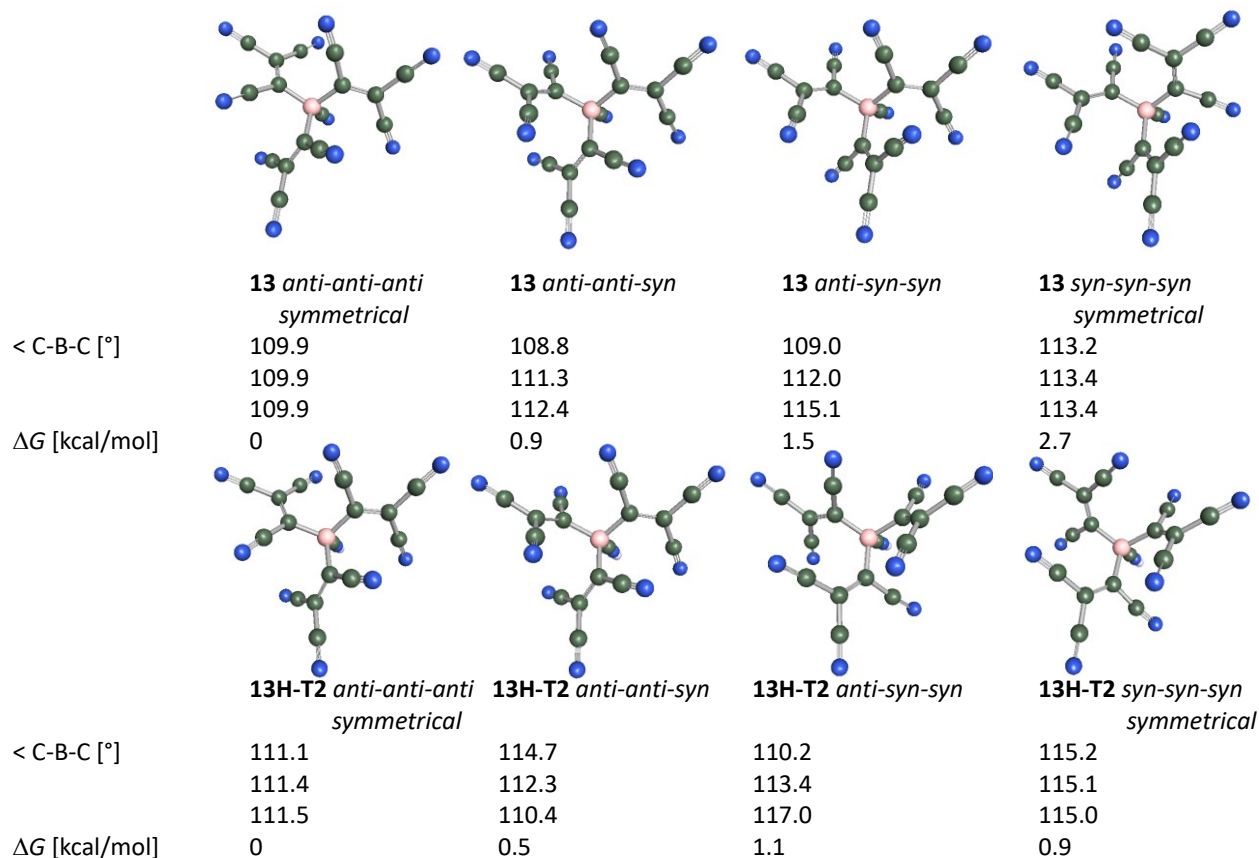

**Figure S11.** Different conformers of anion **13** and its  $\Delta G$  values compared to the most stable, the least congested symmetrical *anti-anti-anti* conformer.

**Table S6.**  $\Delta G$  values (kcal/mol) of the most stable conformers of different tautomers for compound **13H**, relative to the **13H-T2** *anti-anti* conformer at BP86/def-TZVP level.

| <b>13H-T2</b>         | <b>13H-T5</b>          | <b>13H-T6</b>         | <b>13H-T4</b>          |
|-----------------------|------------------------|-----------------------|------------------------|
| <i>anti-anti-anti</i> | <i>trans-anti-anti</i> | <i>anti-anti-anti</i> | <i>trans-anti-anti</i> |
| 0                     | 13.0                   | 14.3                  | 19.5                   |

The fourth replacement of the CN group with the TCNV group is the most interesting (Figure S12). The most basic site, a single CN group, is now missing. Since no specific configurations for anion could be envisaged, the program COSMOconf was used to find the most stable conformers for anion. Then, four of the most stable anion conformers were chosen, and further calculations were carried out with these. GA values for all the protonation sites in the case of **T4**, **T5**, and **T6** tautomers were calculated. The most stable form is, interestingly, the **T6** tautomer (Table S7).

**Table S7.**  $\Delta G$  values (kcal/mol) of the most stable conformers of different tautomers for compound **14H**, relative to the **14H-T6** conformer at BP86/def-TZVP level.

| <b>14H-T6</b> | <b>14H-T5</b> | <b>14H-T4</b> |
|---------------|---------------|---------------|
| 0             | 4.0           | 4.7           |

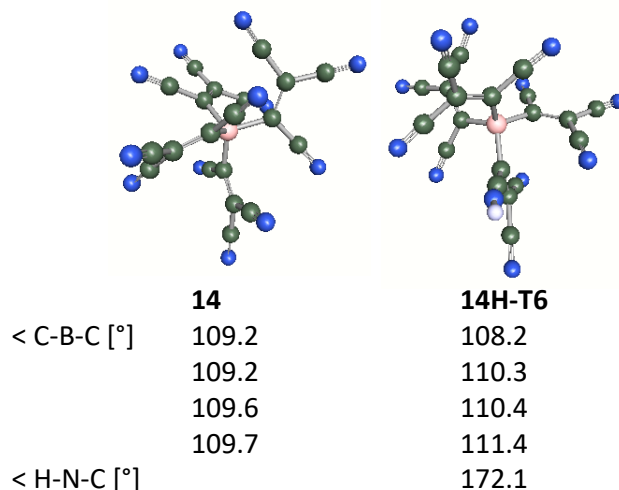

**Figure S12.** The most stable conformers of anion **14** and its most stable acid form, tautomer **T6**.

### 1.3.5. Additional acids

Anions of CN<sup>-</sup> (**15**) and TCNV<sup>-</sup> (**16**) were included in this work for comparison. HCN and HNC are stick-like, and the proton is not bent. Protonated TCNV anion forms interesting structures during optimization (Figure S13); different tautomers exhibit huge instability compared to the most stable acid form.

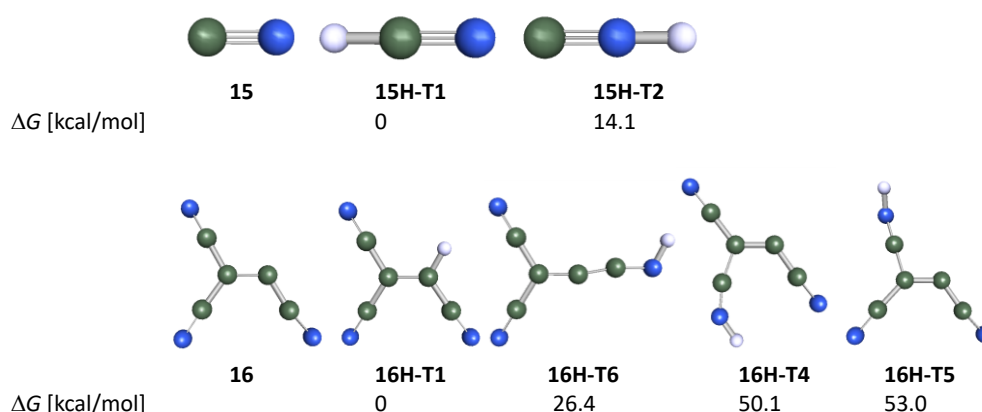

**Figure S13.** Geometries and  $\Delta G$  values of  $\text{CN}^-$  and  $\text{TCNV}^-$  anions and their acid forms.

Champions in acidity, carborane and dodecaborate acids were included in this work. Only the fully cyanated molecules were studied. As seen from Figure S14, the most stable neutral form of dodecaborate is the one where both protons are as far as possible from each other. The most stable neutral form for carborane acid is the proton attached to the CN group utmost the C-atom of the carborane cage (12 vertex).

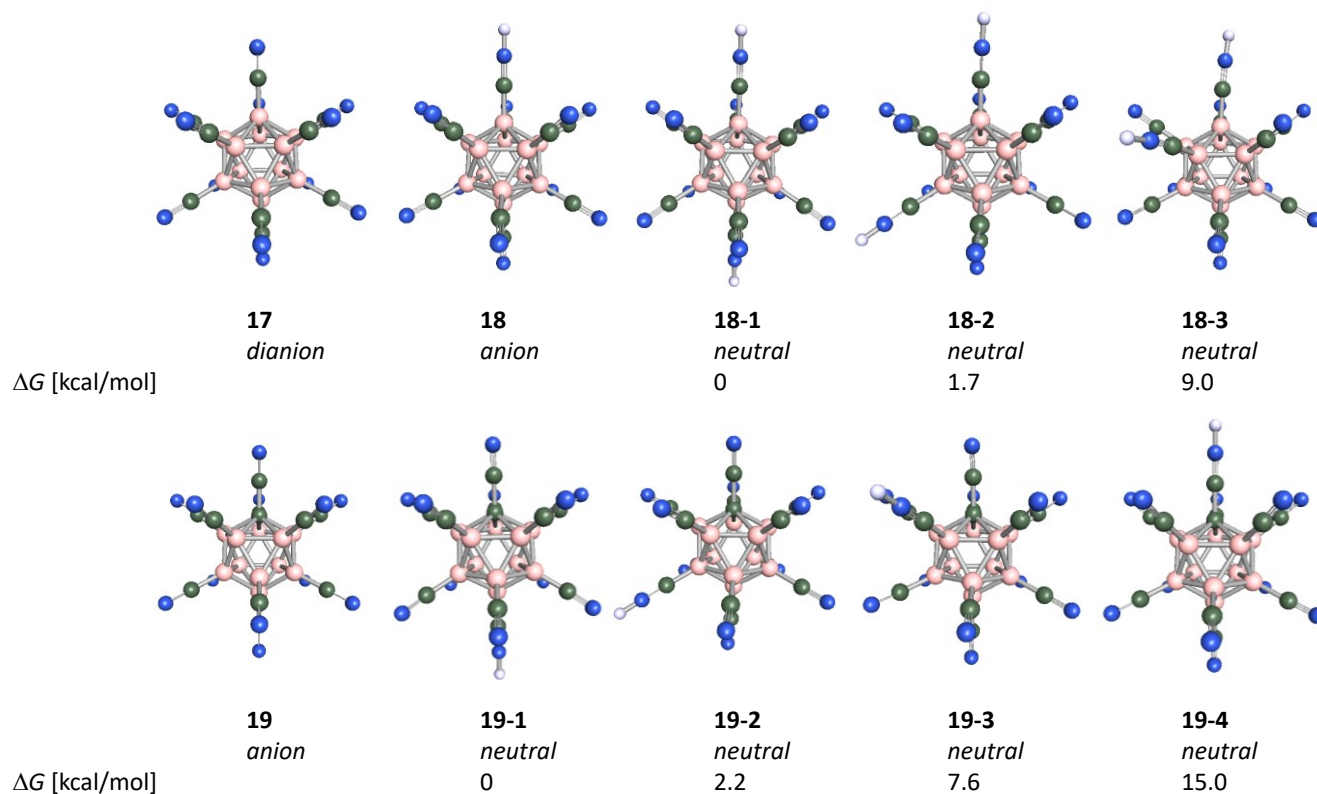

**Figure S14.** Geometries of dodecaborate dianion 17 and carborane 19 and their protonated forms.

**Table S8.** pK<sub>a</sub> values in different solvents used for final results.

| Compound |                                                     | COSMO-RS<br>pK <sub>a</sub> (MeCN)<br>not corrected | COSMO-RS<br>pK <sub>a</sub> (MeCN)<br>corrected | COSMO-RS<br>pK <sub>a</sub> (DMSO) | pK <sub>a</sub> (DMSO)<br>correlation | pK <sub>a</sub> (DMSO)<br>correlation | AVERAGE<br>pK <sub>a</sub> (DMSO) | COSMO-RS<br>pK <sub>a</sub> (H <sub>2</sub> O) | pK <sub>a</sub> (DCE)<br>correlation | pK <sub>a</sub> (DCE)<br>absolute |
|----------|-----------------------------------------------------|-----------------------------------------------------|-------------------------------------------------|------------------------------------|---------------------------------------|---------------------------------------|-----------------------------------|------------------------------------------------|--------------------------------------|-----------------------------------|
|          |                                                     | A                                                   | B                                               | C                                  | D                                     | E                                     | F                                 | G                                              | H                                    | I                                 |
| 1H       | [CN-O]H                                             | 22.0                                                | 24.2                                            | 10.6                               | 12.1                                  | 12.8                                  | 12.4                              | 4.8                                            | 14.7                                 | 59.7                              |
| 2H       | [O-TCNV]H                                           | 2.9                                                 | 5.1                                             | -5.1                               | -7.4                                  | -6.7                                  | -7.0                              | -3.2                                           | -6.6                                 | 38.4                              |
| 3H       | [(CN) <sub>2</sub> N]H                              | 10.3                                                | 12.5                                            | 0.9                                | 0.2                                   | 0.9                                   | 0.5                               | 0.0                                            | 1.7                                  | 46.7                              |
| 4H       | [CN-N-TCNV]H                                        | 3.6                                                 | 5.7                                             | -4.9                               | -6.7                                  | -6.0                                  | -6.3                              | -2.7                                           | -5.8                                 | 39.2                              |
| 5H       | [N-TCNV <sub>2</sub> ]H                             | -1.0                                                | 1.2                                             | -8.6                               | -11.4                                 | -10.6                                 | -11.0                             | -4.5                                           | -10.9                                | 34.1                              |
| 6H       | [(CN) <sub>3</sub> C]H                              | 2.8                                                 | 4.9                                             | -5.4                               | -7.6                                  | -6.8                                  | -7.2                              | -3.6                                           | -6.8                                 | 38.2                              |
| 7H       | [(CN) <sub>2</sub> -C-TCNV]H                        | -4.6                                                | -2.4                                            | -11.2                              | -15.1                                 | -14.3                                 | -14.7                             | -7.3                                           | -15.0                                | 30.0                              |
| 8H       | [CN-C-TCNV <sub>2</sub> ]H                          | -7.3                                                | -5.2                                            | -13.3                              | -17.9                                 | -17.1                                 | -17.5                             | -8.7                                           | -18.0                                | 27.0                              |
| 9H       | [C-TCNV <sub>3</sub> ]H                             | -9.7                                                | -7.6                                            | -15.0                              | -20.3                                 | -19.6                                 | -20.0                             | -10.0                                          | -20.7                                | 24.3                              |
| 10H      | [(CN) <sub>4</sub> B]H                              | -5.6                                                | -3.5                                            | -11.5                              | -16.1                                 | -15.4                                 | -15.8                             | -7.8                                           | -16.1                                | 28.9                              |
| 11H      | [(CN) <sub>3</sub> -B-TCNV]H                        | -6.2                                                | -4.1                                            | -12.0                              | -16.8                                 | -16.0                                 | -16.4                             | -8.0                                           | -16.8                                | 28.2                              |
| 12H      | [(CN) <sub>2</sub> -B-TCNV <sub>2</sub> ]H          | -7.1                                                | -4.9                                            | -12.6                              | -17.6                                 | -16.9                                 | -17.2                             | -8.3                                           | -17.7                                | 27.3                              |
| 13H      | [CN-B-TCNV <sub>3</sub> ]H                          | -8.0                                                | -5.9                                            | -13.3                              | -18.6                                 | -17.9                                 | -18.2                             | -8.8                                           | -18.8                                | 26.2                              |
| 14H      | [B-TCNV <sub>4</sub> ]H                             | -15.0                                               | -12.9                                           | -18.6                              | -25.7                                 | -25.0                                 | -25.3                             | -13.0                                          | -26.6                                | 18.4                              |
| 15H      | HCN                                                 | 26.2                                                | 28.4                                            | 14.6                               | 16.4                                  | 17.1                                  | 16.8                              | 8.6                                            | 19.4                                 | 64.4                              |
| 16H      | C(CN) <sub>2</sub> =CH(CN)                          | 27.4                                                | 29.7                                            | 13.2                               | 17.7                                  | 18.4                                  | 18.1                              | 11.6                                           | 20.8                                 | 65.8                              |
| 17H      | [B <sub>12</sub> (CN) <sub>12</sub> ]H <sup>-</sup> | -10.2                                               | -8.1                                            | -14.9                              | -20.8                                 | -20.1                                 | -20.4                             | -11.3                                          | -21.2                                | 23.8                              |
| 18H      | [B <sub>12</sub> (CN) <sub>12</sub> ]H <sub>2</sub> | -13.5                                               | -11.4                                           | -17.8                              | -24.1                                 | -23.4                                 | -23.8                             | -11.8                                          | -24.9                                | 20.1                              |
| 19H      | [CB <sub>11</sub> (CN) <sub>12</sub> ]H             | -16.3                                               | -14.2                                           | -19.8                              | -27.1                                 | -26.4                                 | -26.7                             | -13.3                                          | -28.1                                | 16.9                              |

**A:** COSMO-RS pK<sub>a</sub>(MeCN) values obtained from the calculations according to the .cosmo files available in DataDoi data repository. Different tautomers and conformers are taken into account.

**B:** COSMO-RS pK<sub>a</sub>(MeCN) values that are corrected according to Eq 4 in the main text.

**C:** COSMO-RS pK<sub>a</sub>(DMSO) values obtained from the calculations according to the .cosmo files available in DataDoi data repository.

**D:** pK<sub>a</sub>(DMSO) values that are obtained from the correlation from corrected pK<sub>a</sub>(MeCN) values (column B) using the equation from Ref [42] in the main text.

**E:** pK<sub>a</sub>(DMSO) values that are obtained from the correlation from corrected pK<sub>a</sub>(MeCN) values (column B) using the equation from Ref [34] in the main text.

**F:** Final assigned pK<sub>a</sub>(DMSO) values that are obtained by averaging pK<sub>a</sub>(DMSO) values from columns D and E.

**G:** COSMO-RS pK<sub>a</sub>(H<sub>2</sub>O) values obtained from the calculations according to the .cosmo files available in DataDoi data repository. The values are not corrected.

**H:** Relative pK<sub>a</sub>(DCE) values that are obtained from the correlation from corrected pK<sub>a</sub>(MeCN) values (column B) using the equation from Ref [3] in the main text.

**I:** Absolute pK<sub>a</sub>(DCE) values according to the Ref [37] in the main text. All these values are 45.0 units higher than the values in column H.

**Table S9.** The total molecular energies, PA and GA values, and a number of imaginary frequencies (N imag) of the studied molecules. When different conformers are named, the first group in the row of the names is always the protonated TCNV group, and counting continues clockwise, or the position of the proton is specifically noted. A single CN group or proton, in the case of **T1** and **T2**, is generally facing downwards or backward. Conformation of the TCNV group in the case of compounds **9H** and **13H** are determined regarding the C-C-C plane around central atom C or B, respectively; the conformation is decided according to the CN group in 1<sup>st</sup> position of the TCNV group.

| Compound | Basis set          | Total energy<br>Ha | Enthalpy<br>Ha | H<br>Ha     | PA<br>kcal/mol | Chem. Pot.<br>Ha | G<br>Ha     | GA<br>kcal/mol | N imag |
|----------|--------------------|--------------------|----------------|-------------|----------------|------------------|-------------|----------------|--------|
| <b>1</b> |                    |                    |                |             |                |                  |             |                |        |
| Anion    |                    |                    |                |             |                |                  |             |                |        |
|          | BP86/def-TZVP      | -168.207622        | 0.014630       | -168.192992 |                | -0.010231        | -168.217852 |                | 0      |
|          | BP86/def2-TZVPP    | -168.214437        | 0.014653       | -168.199784 |                | -0.010202        | -168.224639 |                | 0      |
|          | BP86/def2-TZVPPD   | -168.218957        | 0.014584       | -168.204373 |                | -0.010276        | -168.229233 |                | 0      |
|          | B3LYP/def2-TZVPPD  | -168.122537        | 0.015239       | -168.107298 |                | -0.001430        | -168.123967 |                | 0      |
|          | B3LYP/6-311+G(d,p) |                    |                | -168.172144 |                |                  | -168.197063 |                | 0      |
|          | G4(MP2)            |                    |                | -167.955641 |                |                  | -167.980531 |                | 0      |
|          | W1RO               |                    |                | -168.200611 |                |                  | -168.225527 |                | 0      |
|          | CBS-APNO           |                    |                | -168.113344 |                |                  | -168.138159 |                | 0      |
| Neutral  |                    |                    |                |             |                |                  |             |                |        |
| T1       | BP86/def-TZVP      | -168.716794        | 0.024878       | -168.691916 | 314.6          | -0.002685        | -168.719479 | 308.5          | 0      |
| T2       | BP86/def-TZVP      | -168.764542        | 0.024798       | -168.739744 | 344.6          | -0.002388        | -168.766930 | 338.3          | 0      |
|          | BP86/def2-TZVPP    | -168.774659        | 0.024827       | -168.749832 | 346.6          | -0.002359        | -168.777018 | 340.3          | 0      |
|          | BP86/def2-TZVPPD   | -168.775643        | 0.024820       | -168.750823 | 344.4          | -0.002365        | -168.778008 | 338.1          | 0      |
|          | B3LYP/def2-TZVPPD  | -168.678486        | 0.025321       | -168.653165 | 344.0          | -0.001785        | -168.680271 | 342.8          | 0      |
|          | B3LYP/6-311+G(d,p) |                    |                | -168.713282 | 341.0          |                  | -168.740361 | 334.6          | 0      |
|          | G4(MP2)            |                    |                | -168.497657 | 341.6          |                  | -168.524743 | 335.2          | 0      |
|          | W1RO               |                    |                | -168.742541 | 341.5          |                  | -168.769626 | 335.1          | 0      |
|          | CBS-APNO           |                    |                | -168.655663 | 341.8          |                  | -168.682714 | 335.4          | 0      |
| <b>2</b> |                    |                    |                |             |                |                  |             |                |        |
| Anion    |                    |                    |                |             |                |                  |             |                |        |
|          | BP86/def-TZVP      | -430.226987        | 0.047818       | -430.179169 |                | 0.004879         | -430.222108 |                | 0      |
|          | BP86/def2-TZVPP    | -430.245433        | 0.047779       | -430.197654 |                | 0.004868         | -430.240565 |                | 0      |
|          | BP86/def2-TZVPPD   | -430.248071        | 0.047724       | -430.200347 |                | 0.004780         | -430.243291 |                | 0      |
|          | B3LYP/def2-TZVPPD  | -429.993634        | 0.049008       | -429.944626 |                | 0.006489         | -429.987145 |                | 0      |
|          | B3LYP/6-311+G(d,p) |                    |                | -430.118532 |                |                  | -430.160900 |                | 0      |
|          | G4(MP2)            |                    |                | -429.535840 |                |                  | -429.578200 |                | 0      |
|          | W1RO               |                    |                | -430.171189 |                |                  | -430.213701 |                | 0      |
|          | CBS-APNO           |                    |                | -429.989995 |                |                  | -430.032120 |                | 0      |
| Neutral  |                    |                    |                |             |                |                  |             |                |        |

|                 |                    |             |          |             |       |           |             |       |   |
|-----------------|--------------------|-------------|----------|-------------|-------|-----------|-------------|-------|---|
| T1              | BP86/def-TZVP      | -430.698883 | 0.060176 | -430.638707 | 289.8 | 0.016565  | -430.682319 | 282.5 | 0 |
|                 | BP86/def2-TZVPP    | -430.720183 | 0.060251 | -430.659932 | 291.6 | 0.016697  | -430.703486 | 284.2 | 0 |
|                 | BP86/def2-TZVPPD   | -430.721855 | 0.060231 | -430.661624 | 290.9 | 0.016709  | -430.705146 | 283.5 | 0 |
|                 | B3LYP/def2-TZVPPD  | -430.468759 | 0.061838 | -430.406921 | 291.6 | 0.018721  | -430.450038 | 284.2 | 0 |
|                 | B3LYP/6-311+G(d,p) |             |          | -430.577397 | 289.4 |           | -430.620442 | 282.1 | 0 |
|                 | G4(MP2)            |             |          | -430.002708 | 294.4 |           | -430.045755 | 287.1 | 0 |
|                 | W1RO               |             |          | -430.637035 | 293.8 |           | -430.680197 | 286.5 | 0 |
|                 | CBS-APNO           |             |          | -430.453922 | 292.6 |           | -430.49682  | 285.3 | 0 |
| T3; eclipsed(H) | BP86/def-TZVP      | -430.685699 | 0.059358 | -430.626341 | 282.1 | 0.014557  | -430.671142 | 275.5 | 0 |
| T3; syn(H)      | BP86/def-TZVP      | -430.686088 | 0.059539 | -430.626549 | 282.2 | 0.014566  | -430.671522 | 275.7 | 0 |
| T3; anti(H)     | BP86/def-TZVP      | -430.683587 | 0.058586 | -430.625001 | 281.2 | 0.016476  | -430.667111 | 273.0 | 1 |
| T4              | BP86/def-TZVP      | -430.691937 | 0.059061 | -430.632876 | 286.2 | 0.015090  | -430.676847 | 279.1 | 0 |
| T5              | BP86/def-TZVP      | -430.691022 | 0.059076 | -430.631946 | 285.6 | 0.015018  | -430.676004 | 278.5 | 0 |
| T6              | BP86/def-TZVP      | -430.663974 | 0.057860 | -430.606114 | 269.4 | 0.012976  | -430.650998 | 262.9 | 0 |
| <b>3</b>        |                    |             |          |             |       |           |             |       |   |
| Anion           |                    |             |          |             |       |           |             |       |   |
|                 | BP86/def-TZVP      | -240.607141 | 0.025478 | -240.581663 |       | -0.006791 | -240.613933 |       | 0 |
|                 | BP86/def2-TZVPP    | -240.618830 | 0.025484 | -240.593346 |       | -0.006740 | -240.625570 |       | 0 |
|                 | BP86/def2-TZVPPD   | -240.621254 | 0.025456 | -240.595798 |       | -0.006778 | -240.628032 |       | 0 |
|                 | B3LYP/def2-TZVPPD  | -240.474743 | 0.026101 | -240.448642 |       | -0.005964 | -240.480707 |       | 0 |
|                 | B3LYP/6-311+G(d,p) |             |          | -240.548045 |       |           | -240.580080 |       | 0 |
|                 | G4(MP2)            |             |          | -240.216648 |       |           | -240.248658 |       | 0 |
|                 | W1RO               |             |          | -240.568517 |       |           | -240.600555 |       | 0 |
|                 | CBS-APNO           |             |          | -240.46843  |       |           | -240.500308 |       | 0 |
| Neutral         |                    |             |          |             |       |           |             |       |   |
| T1              | BP86/def-TZVP      | -241.101085 | 0.037495 | -241.063590 | 303.9 | 0.003874  | -241.097211 | 297.0 | 0 |
| T2              | BP86/def-TZVP      | -241.116908 |          | -241.116908 | 337.3 | 0.003535  | -241.113374 | 307.1 | 0 |
|                 | BP86/def2-TZVPP    | -241.131063 | 0.036729 | -241.094334 | 315.9 | 0.003631  | -241.127432 | 308.6 | 0 |
|                 | BP86/def2-TZVPPD   | -241.132002 | 0.036724 | -241.095278 | 314.9 | 0.003624  | -241.128378 | 307.7 | 0 |
|                 | B3LYP/def2-TZVPPD  | -240.984167 | 0.037589 | -240.946578 | 313.9 | 0.004685  | -240.979482 | 306.7 | 0 |
|                 | B3LYP/6-311+G(d,p) |             |          | -241.042429 | 311.7 |           | -241.075302 | 304.5 | 0 |
|                 | G4(MP2)            |             |          | -240.709896 | 311.0 |           | -240.742776 | 303.8 | 0 |
|                 | W1RO               |             |          | -241.061506 | 310.8 |           | -241.094404 | 303.6 | 0 |
|                 | CBS-APNO           |             |          | -240.961639 | 311.0 |           | -240.994359 | 303.7 | 0 |
| <b>4</b>        |                    |             |          |             |       |           |             |       |   |
| Anion           |                    |             |          |             |       |           |             |       |   |
| anti            | BP86/def-TZVP      | -502.618281 | 0.060086 | -502.558195 |       | 0.012379  | -502.605902 |       | 0 |

|                                       |                    |             |          |             |       |            |             |       |   |
|---------------------------------------|--------------------|-------------|----------|-------------|-------|------------|-------------|-------|---|
|                                       | BP86/def2-TZVPP    | -502.641764 | 0.060064 | -502.581700 |       | 0.012401   | -502.629363 |       | 0 |
|                                       | BP86/def2-TZVPPD   | -502.644033 | 0.060001 | -502.584032 |       | 0.012292   | -502.631741 |       | 0 |
|                                       | B3LYP/def2-TZVPPD  | -502.338368 | 0.061590 | -502.276778 |       | 0.014455   | -502.323913 |       | 0 |
|                                       | B3LYP/6-311+G(d,p) |             |          | -502.486274 |       |            | -502.533246 |       | 0 |
|                                       | G4(MP2)            |             |          | -501.791892 |       |            | -501.838878 |       | 0 |
|                                       | W1RO               |             |          | -502.532800 |       |            | -502.579916 |       | 0 |
|                                       | CBS-APNO           |             |          | -502.339803 |       |            | -502.386434 |       | 0 |
| syn                                   | BP86/def-TZVP      | -502.613592 | 0.060053 | -502.553539 |       | 0.012192   | -502.601400 |       | 0 |
|                                       | BP86/def2-TZVPP    | -502.636604 | 0.060022 | -502.576582 |       | 0.012236   | -502.624368 |       | 0 |
| Neutral                               |                    |             |          |             |       |            |             |       |   |
| T1; syn                               | BP86/def-TZVP      | -503.077630 | 0.072579 | -503.005051 | 284.8 | 0.023085   | -503.054544 | 278.1 | 0 |
| T1; anti                              | BP86/def-TZVP      | -503.083250 | 0.072541 | -503.010709 | 285.4 | 0.023885   | -503.059364 | 278.3 | 0 |
| T2; anti                              | BP86/def-TZVP      | -503.092361 | 0.071365 | -503.020996 | 291.9 | 0.022293   | -503.070068 | 285.0 | 0 |
|                                       | BP86/def2-TZVPP    | -503.118123 | 0.071368 | -503.046755 | 293.3 | 0.022373   | -503.095750 | 286.4 | 0 |
|                                       | BP86/def2-TZVPPD   | -503.119703 | 0.071330 | -503.048373 | 292.9 | 0.022281   | -503.097422 | 285.9 | 0 |
|                                       | B3LYP/def2-TZVPPD  | -502.813497 | 0.073115 | -502.740382 | 292.4 | 0.024645   | -502.788852 | 285.5 | 0 |
|                                       | B3LYP/6-311+G(d,p) |             |          | -502.946737 | 290.4 |            | -502.995025 | 283.5 | 0 |
|                                       | G4(MP2)            |             |          | -502.252907 | 290.8 |            | -502.301252 | 283.9 | 0 |
|                                       | W1RO               |             |          | -502.993228 | 290.4 |            | -503.041704 | 283.5 | 0 |
|                                       | CBS-APNO           |             |          | -502.799239 | 289.8 |            | -502.847250 | 282.9 | 0 |
| T2; syn                               | BP86/def-TZVP      | -503.090845 | 0.071325 | -503.019520 | 293.9 | 0.022419   | -503.068426 | 286.8 | 0 |
|                                       | BP86/def2-TZVPP    | -503.116373 | 0.071347 | -503.045026 | 295.4 | 0.022545   | -503.093828 | 288.3 | 0 |
| T3; trans, eclipsed(H)                | BP86/def-TZVP      | -503.061094 | 0.071521 | -502.989573 | 272.2 | 0.022088   | -503.039006 | 265.5 | 0 |
| T3; trans, syn(H)                     | BP86/def-TZVP      | -503.062100 | 0.071635 | -502.990465 | 272.7 | 0.022163   | -503.039937 | 266.1 | 0 |
| T3; cis, anti(H)                      | BP86/def-TZVP      | -503.057950 | 0.071583 | -502.986367 | 273.1 | 0.022316   | -503.035634 | 266.2 | 0 |
| T3; cis, syn(H)                       | BP86/def-TZVP      | -503.060834 | 0.071613 | -502.989221 | 274.9 | 0.022209   | -503.038625 | 268.1 | 0 |
| T4; trans                             | BP86/def-TZVP      | -503.068630 | 0.071146 | -502.997484 | 277.1 | 0.022537   | -503.046093 | 269.9 | 0 |
| T4; cis                               | BP86/def-TZVP      | -503.064892 | 0.071039 | -502.993853 | 277.8 | 0.022164   | -503.042729 | 270.7 | 0 |
| T5; trans                             | BP86/def-TZVP      | -503.068128 | 0.071142 | -502.996986 | 276.8 | 0.022344   | -503.045784 | 269.8 | 0 |
| T5; cis                               | BP86/def-TZVP      | -503.067114 | 0.071113 | -502.996001 | 279.1 | 0.022738   | -503.044376 | 271.7 | 0 |
| T6; anti                              | BP86/def-TZVP      | -503.039063 | 0.070006 | -502.969057 | 259.3 | 0.019915   | -503.019148 | 253.0 | 0 |
| T6; syn                               | BP86/def-TZVP      | -503.034477 | 0.070179 | -502.964298 | 259.2 | 0.019713   | -503.014764 | 253.1 | 0 |
| 5                                     |                    |             |          |             |       |            |             |       |   |
| Anion                                 |                    |             |          |             |       |            |             |       |   |
| Anion; anti-syn (syn facing forward)  | BP86/def-TZVP      | -764.601870 | 0.094724 | -764.507146 |       | 0.03208581 | -764.569784 |       | 0 |
| Anion; anti-syn (syn facing backward) | BP86/def-TZVP      | -764.601863 | 0.094718 | -764.507145 |       | 0.03207300 | -764.569790 |       | 0 |
|                                       | BP86/def2-TZVPP    | -764.636463 | 0.094656 | -764.541807 |       | 0.03207300 | -764.604390 |       | 0 |
| anti-anti                             | BP86/def-TZVP      | -764.605066 | 0.094637 | -764.510429 |       | 0.03244700 | -764.572619 |       | 0 |

|                                    |                    |             |          |             |       |            |             |       |   |
|------------------------------------|--------------------|-------------|----------|-------------|-------|------------|-------------|-------|---|
|                                    | BP86/def2-TZVPP    | -764.639837 | 0.094581 | -764.545256 |       | 0.03166500 | -764.608172 |       | 0 |
|                                    | BP86/def2-TZVPPD   | -764.642582 | 0.094465 | -764.548117 |       | 0.03100900 | -764.611573 |       | 0 |
|                                    | B3LYP/def2-TZVPPD  | -764.177664 | 0.097000 | -764.080664 |       | 0.03470100 | -764.142963 |       | 0 |
|                                    | B3LYP/6-311+G(d,p) |             |          | -764.400802 |       |            | -764.462556 |       | 0 |
|                                    | G4(MP2)            |             |          | -763.345822 |       |            | -763.407662 |       | 0 |
|                                    | CBS-APNO           |             |          | -764.190708 |       |            | -764.252022 |       | 0 |
| syn-syn                            | BP86/def-TZVP      | -764.598170 | 0.094726 | -764.503444 |       | 0.03228400 | -764.565886 |       | 0 |
| Neutral                            |                    |             |          |             |       |            |             |       |   |
| T1; anti-syn (syn facing forward)  | BP86/def-TZVP      | -765.051942 | 0.107391 | -764.944551 | 276.0 | 0.04410500 | -765.007837 | 268.6 | 0 |
| T1; anti-syn (syn facing backward) | BP86/def-TZVP      | -765.051928 | 0.107361 | -764.944567 | 276.0 | 0.04404181 | -765.007886 | 268.6 | 0 |
|                                    | BP86/def2-TZVPP    | -765.087543 | 0.107302 | -764.980241 | 276.6 | 0.04403000 | -765.043513 | 269.3 | 0 |
| T1; syn-syn                        | BP86/def-TZVP      | -765.048189 | 0.107416 | -764.940773 | 275.9 | 0.04460700 | -765.003582 | 268.4 | 0 |
| T1; anti-anti                      | BP86/def-TZVP      | -765.056284 | 0.107464 | -764.948820 | 276.6 | 0.04369700 | -765.012587 | 269.8 | 0 |
|                                    | BP86/def2-TZVPP    | -765.092233 | 0.107387 | -764.984846 | 277.3 | 0.04358200 | -765.048651 | 270.1 | 0 |
|                                    | BP86/def2-TZVPPD   | -765.094552 | 0.107236 | -764.987316 | 277.1 | 0.04227200 | -765.052280 | 270.3 | 0 |
|                                    | B3LYP/def2-TZVPPD  | -764.631166 | 0.110206 | -764.520960 | 277.8 | 0.04687100 | -764.584295 | 270.7 | 0 |
|                                    | B3LYP/6-311+G(d,p) |             |          | -764.838918 | 276.4 |            | -764.901472 | 269.1 | 0 |
|                                    | G4(MP2)            |             |          | -763.792555 | 281.8 |            | -763.855306 | 274.6 | 0 |
|                                    | CBS-APNO           |             |          | -764.63221  | 278.5 |            | -764.694763 | 271.5 | 0 |
| T3; cis-anti, eclipsed(H)          | BP86/def-TZVP      | -765.025965 | 0.106032 | -764.919933 | 260.5 | 0.04185933 | -764.984105 | 253.7 | 0 |
| T3; cis-anti, syn(H)               | BP86/def-TZVP      | -765.025564 | 0.106185 | -764.919379 | 260.2 | 0.04065200 | -764.984912 | 254.2 | 0 |
| T3; trans-anti, syn(H)             | BP86/def-TZVP      | -765.030874 | 0.106238 | -764.924636 | 261.4 | 0.04114708 | -764.989727 | 255.5 | 0 |
| T3; trans-anti, eclipsed(H)        | BP86/def-TZVP      | -765.029303 | 0.106140 | -764.923163 | 260.5 | 0.04102600 | -764.988277 | 254.6 | 0 |
| T3; cis-syn, eclipsed(H)           | BP86/def-TZVP      | -765.025547 | 0.106099 | -764.919448 | 262.5 | 0.04274000 | -764.982807 | 255.3 | 0 |
| T3; cis-syn, syn(H)                | BP86/def-TZVP      | -765.023788 | 0.106339 | -764.917449 | 261.3 | 0.04118100 | -764.982607 | 255.2 | 0 |
| T3; trans-syn, syn(H)              | BP86/def-TZVP      | -765.028440 | 0.106418 | -764.922022 | 261.8 | 0.04126600 | -764.987174 | 255.6 | 0 |
| T3; trans-syn, eclipsed(H)         | BP86/def-TZVP      | -765.029077 | 0.106315 | -764.922762 | 262.3 | 0.04156800 | -764.987509 | 255.8 | 0 |
| T4; cis-anti                       | BP86/def-TZVP      | -765.034108 | 0.105774 | -764.928334 | 265.8 | 0.04181363 | -764.992295 | 258.9 | 0 |
| T4; trans-anti                     | BP86/def-TZVP      | -765.038000 | 0.105731 | -764.932269 | 266.2 | 0.04156986 | -764.996430 | 259.7 | 0 |
| T4; cis-syn                        | BP86/def-TZVP      | -765.033990 | 0.105858 | -764.928132 | 268.0 | 0.04209200 | -764.991898 | 261.0 | 0 |
| T4; trans-syn                      | BP86/def-TZVP      | -765.037230 | 0.105928 | -764.931302 | 267.6 | 0.04198600 | -764.995244 | 260.7 | 0 |
| T5; trans-anti                     | BP86/def-TZVP      | -765.039415 | 0.105696 | -764.933719 | 267.1 | 0.04126900 | -764.998146 | 260.7 | 0 |
| T5; cis-syn                        | BP86/def-TZVP      | -765.030109 | 0.105821 | -764.924288 | 265.6 | 0.04059900 | -764.989510 | 259.5 | 0 |
| T5; trans-syn                      | BP86/def-TZVP      | -765.035593 | 0.105876 | -764.929717 | 266.6 | 0.04164700 | -764.993946 | 259.9 | 0 |
| T5; cis-anti                       | BP86/def-TZVP      | -765.031063 | 0.105717 | -764.925346 | 263.9 | 0.04159800 | -764.989465 | 257.1 | 0 |
| T6; anti-anti                      | BP86/def-TZVP      | -765.012987 | 0.104621 | -764.908366 | 251.2 | 0.03991400 | -764.973073 | 245.0 | 0 |
| T6; syn-syn                        | BP86/def-TZVP      | -765.004797 | 0.104861 | -764.899936 | 250.3 | 0.04024200 | -764.964555 | 243.9 | 0 |
| T6; anti-syn                       | BP86/def-TZVP      | -765.009335 | 0.104766 | -764.904569 | 250.9 | 0.04059800 | -764.968737 | 244.1 | 0 |
| T6; syn-anti                       | BP86/def-TZVP      | -765.007737 | 0.104857 | -764.902880 | 249.8 | 0.03981100 | -764.967926 | 243.6 | 0 |



|                  |                    |             |          |             |       |           |             |       |   |
|------------------|--------------------|-------------|----------|-------------|-------|-----------|-------------|-------|---|
| 6                |                    |             |          |             |       |           |             |       |   |
| Anion            |                    |             |          |             |       |           |             |       |   |
|                  | BP86/def-TZVP      | -316.838101 | 0.037123 | -316.800978 |       | -0.000673 | -316.838774 |       | 0 |
|                  | BP86/def2-TZVPP    | -316.851152 | 0.037055 | -316.814097 |       | -0.000747 | -316.851899 |       | 0 |
|                  | BP86/def2-TZVPPD   | -316.853112 | 0.037007 | -316.816105 |       | -0.000834 | -316.853946 |       | 0 |
|                  | B3LYP/def2-TZVPPD  | -316.663083 | 0.037914 | -316.625169 |       | 0.000340  | -316.662743 |       | 0 |
|                  | B3LYP/6-311+G(d,p) |             |          | -316.760517 |       |           | -316.797325 |       | 0 |
|                  | G4(MP2)            |             |          | -316.317077 |       |           | -316.353858 |       | 0 |
|                  | W1RO               |             |          | -316.784822 |       |           | -316.821714 |       | 0 |
|                  | CBS-APNO           |             |          | -316.662846 |       |           | -316.699558 |       | 0 |
| Neutral          |                    |             |          |             |       |           |             |       |   |
| T1               | BP86/def-TZVP      | -317.316257 | 0.048770 | -317.267487 | 294.2 | 0.010067  | -317.306190 | 287.0 | 0 |
| T2               | BP86/def-TZVP      | -317.317464 | 0.048394 | -317.269070 | 295.2 | 0.009899  | -317.307564 | 287.9 | 0 |
|                  | BP86/def2-TZVPP    | -317.332801 | 0.048398 | -317.284403 | 296.6 | 0.009906  | -317.322895 | 289.3 | 0 |
|                  | BP86/def2-TZVPPD   | -317.333837 | 0.048380 | -317.285457 | 296.0 | 0.009873  | -317.323964 | 288.7 | 0 |
|                  | B3LYP/def2-TZVPPD  | -317.142341 | 0.049588 | -317.092753 | 294.9 | 0.011412  | -317.130929 | 287.5 | 0 |
|                  | B3LYP/6-311+G(d,p) |             |          | -317.225116 | 293.0 |           | -317.263178 | 286.0 | 0 |
|                  | G4(MP2)            |             |          | -316.782681 | 293.6 |           | -316.820796 | 286.7 | 0 |
|                  | W1RO               |             |          | -317.249515 | 293.1 |           | -317.287697 | 286.1 | 0 |
|                  | CBS-APNO           |             |          | -317.127541 | 293.1 |           | -317.165395 | 286.0 | 0 |
| 7                |                    |             |          |             |       |           |             |       |   |
| Anion            |                    |             |          |             |       |           |             |       |   |
|                  | BP86/def-TZVP      | -578.840073 | 0.071969 | -578.768104 |       | 0.018458  | -578.821616 |       | 0 |
|                  | BP86/def2-TZVPP    | -578.865138 | 0.071856 | -578.793282 |       | 0.018561  | -578.846577 |       | 0 |
|                  | BP86/def2-TZVPPD   | -578.867407 | 0.071772 | -578.795635 |       | 0.017646  | -578.849761 |       | 0 |
|                  | B3LYP/def2-TZVPPD  | -578.516890 | 0.073615 | -578.443275 |       | 0.020553  | -578.496337 |       | 0 |
|                  | B3LYP/6-311+G(d,p) |             |          | -578.688752 |       |           | -578.741177 |       | 0 |
|                  | G4(MP2)            |             |          | -577.885015 |       |           | -577.937095 |       | 0 |
|                  | CBS-APNO           |             |          | -578.528093 |       |           | -578.579917 |       | 0 |
| Neutral          |                    |             |          |             |       |           |             |       |   |
| T3 = T1; anti(H) | BP86/def-TZVP      | -579.282082 | 0.083653 | -579.198429 | 271.5 | 0.029599  | -579.252483 | 264.1 | 0 |
| T3 = T1; syn(H)  | BP86/def-TZVP      | -579.284980 | 0.083670 | -579.201310 | 273.3 | 0.029412  | -579.255568 | 266.0 | 0 |
| T2 = T4          | BP86/def-TZVP      | -579.287094 | 0.083051 | -579.204043 | 275.0 | 0.028951  | -579.258142 | 267.6 | 0 |
| T2 = T5          | BP86/def-TZVP      | -579.288599 | 0.083009 | -579.205590 | 276.0 | 0.029706  | -579.258893 | 268.1 | 0 |
|                  | BP86/def2-TZVPP    | -579.315697 | 0.082957 | -579.232740 | 277.2 | 0.029635  | -579.286062 | 269.5 | 0 |
|                  | BP86/def2-TZVPPD   | -579.317462 | 0.082883 | -579.234579 | 276.9 | 0.029432  | -579.288030 | 268.7 | 0 |
|                  | B3LYP/def2-TZVPPD  | -578.965768 | 0.085023 | -578.880745 | 276.0 | 0.032331  | -578.933437 | 268.0 | 0 |

|                           |                    |             |          |             |       |          |             |       |   |
|---------------------------|--------------------|-------------|----------|-------------|-------|----------|-------------|-------|---|
| T6                        | B3LYP/6-311+G(d,p) |             |          | -579.123607 | 274.4 |          | -579.175982 | 266.6 | 0 |
|                           | G4(MP2)            |             |          | -578.321248 | 275.2 |          | -578.373823 | 267.8 | 0 |
|                           | CBS-APNO           |             |          | -578.961449 | 273.4 |          | -579.013592 | 265.9 | 0 |
|                           | BP86/def-TZVP      | -579.257315 | 0.082131 | -579.175184 | 256.9 | 0.026048 | -579.231267 | 250.8 | 0 |
| 8                         |                    |             |          |             |       |          |             |       |   |
| Anion                     |                    |             |          |             |       |          |             |       |   |
| syn-syn                   | BP86/def-TZVP      | -840.819797 | 0.106493 | -840.713304 |       | 0.040279 | -840.779518 |       | 0 |
| anti-syn                  | BP86/def-TZVP      | -840.820188 | 0.106488 | -840.713700 |       | 0.039776 | -840.780412 |       | 0 |
|                           | BP86/def2-TZVPP    | -840.856841 | 0.106409 | -840.750432 |       | 0.039752 | -840.817089 |       | 0 |
|                           | BP86/def2-TZVPPD   | -840.859815 | 0.106167 | -840.753648 |       | 0.038530 | -840.821285 |       | 0 |
|                           | B3LYP/def2-TZVPPD  | -840.348210 | 0.108981 | -840.239229 |       | 0.042792 | -840.305418 |       | 0 |
|                           | B3LYP/6-311+G(d,p) |             |          | -840.595443 |       |          | -840.660817 |       | 0 |
|                           | G4(MP2)            |             |          | -839.434863 |       |          | -839.500343 |       | 0 |
|                           | CBS-APNO           |             |          | -840.375867 |       |          | -840.441015 |       | 0 |
| anti-anti                 | BP86/def-TZVP      | -840.818932 | 0.106470 | -840.712462 |       | 0.039575 | -840.779357 |       | 0 |
|                           | BP86/def2-TZVPP    | -840.855634 | 0.106383 | -840.749251 |       | 0.039492 | -840.816142 |       | 0 |
| Neutral                   |                    |             |          |             |       |          |             |       |   |
| T1; syn-syn               | BP86/def-TZVP      | -841.242638 | 0.118320 | -841.124318 | 259.4 | 0.049481 | -841.193157 | 253.3 | 0 |
| T1; anti-anti             | BP86/def-TZVP      | -841.249249 | 0.118370 | -841.130879 | 264.0 | 0.049039 | -841.200210 | 257.8 | 0 |
| T1; anti-syn = syn-anti   | BP86/def-TZVP      | -841.247075 | 0.118447 | -841.128628 | 261.8 | 0.049382 | -841.197693 | 255.6 | 0 |
| T2; anti-anti             | BP86/def-TZVP      | -841.253550 | 0.117618 | -841.135932 | 267.2 | 0.049683 | -841.203867 | 260.1 | 0 |
|                           | BP86/def2-TZVPP    | -841.292416 | 0.117539 | -841.174877 | 268.6 | 0.049657 | -841.242759 | 261.4 | 0 |
| T2; syn-anti              | BP86/def-TZVP      | -841.253972 | 0.117674 | -841.136298 | 266.7 | 0.049923 | -841.204049 | 259.6 | 0 |
|                           | BP86/def2-TZVPP    | -841.292832 | 0.117608 | -841.175224 | 268.0 | 0.049927 | -841.242905 | 260.9 | 0 |
|                           | BP86/def2-TZVPPD   | -841.295398 | 0.116396 | -841.179002 | 268.4 | 0.050723 | -841.244675 | 259.4 | 1 |
|                           | B3LYP/def2-TZVPPD  | -840.783550 | 0.120449 | -840.663101 | 267.5 | 0.052403 | -840.731147 | 260.9 | 0 |
|                           | B3LYP/6-311+G(d,p) |             |          | -841.016524 | 265.7 |          | -841.083003 | 258.6 | 0 |
|                           | G4(MP2)            |             |          | -839.858440 | 267.3 |          | -839.924998 | 260.2 | 0 |
|                           | CBS-APNO           |             |          | -840.794097 | 263.9 |          | -840.860383 | 256.9 | 0 |
| T2; syn-syn               | BP86/def-TZVP      | -841.250505 | 0.117636 | -841.132869 | 263.3 | 0.049471 | -841.201034 | 258.2 | 0 |
| T3; cis-anti, anti(H)     | BP86/def-TZVP      | -841.240404 | 0.118230 | -841.122174 | 257.8 | 0.049580 | -841.190824 | 251.3 | 0 |
| T3; cis-anti, syn(H)      | BP86/def-TZVP      | -841.241724 | 0.118223 | -841.123501 | 258.6 | 0.048605 | -841.193119 | 252.7 | 0 |
| T3; cis-anti, eclipsed(H) | BP86/def-TZVP      | -841.241562 | 0.118102 | -841.123460 | 258.6 | 0.049473 | -841.192089 | 252.1 | 0 |
| T3; trans-anti, syn(H)    | BP86/def-TZVP      | -841.245605 | 0.118323 | -841.127282 | 261.8 | 0.048582 | -841.197023 | 255.8 | 0 |
| T3; trans-anti, anti(H)   | BP86/def-TZVP      | -841.243104 | 0.118339 | -841.124765 | 260.2 | 0.049261 | -841.193843 | 253.8 | 0 |
| T3; cis-syn, eclipsed(H)  | BP86/def-TZVP      | -841.240368 | 0.118014 | -841.122354 | 258.2 | 0.049750 | -841.190618 | 251.7 | 0 |
| T3; trans-syn, syn(H)     | BP86/def-TZVP      | -841.245773 | 0.118340 | -841.127433 | 261.1 | 0.048742 | -841.197031 | 255.2 | 0 |
| T3; trans-syn, anti(H)    | BP86/def-TZVP      | -841.242490 | 0.118339 | -841.124151 | 259.0 | 0.049261 | -841.193229 | 252.8 | 0 |

|                                                    |                    |              |          |              |       |          |              |       |   |
|----------------------------------------------------|--------------------|--------------|----------|--------------|-------|----------|--------------|-------|---|
| T4; cis-anti                                       | BP86/def-TZVP      | -841.249331  | 0.117665 | -841.131666  | 263.8 | 0.049472 | -841.199859  | 256.9 | 0 |
| T4; cis-syn                                        | BP86/def-TZVP      | -841.250673  | 0.117681 | -841.132992  | 264.8 | 0.049969 | -841.200704  | 258.0 | 0 |
| T4; trans-syn                                      | BP86/def-TZVP      | -841.248912  | 0.117640 | -841.131272  | 263.5 | 0.048967 | -841.199945  | 257.0 | 0 |
| T4; trans-anti                                     | BP86/def-TZVP      | -841.248112  | 0.117615 | -841.130497  | 263.8 | 0.048609 | -841.199503  | 257.4 | 0 |
| T5; trans-anti                                     | BP86/def-TZVP      | -841.250613  | 0.117564 | -841.133049  | 265.4 | 0.049516 | -841.201097  | 258.4 | 0 |
| T5; cis-syn                                        | BP86/def-TZVP      | -841.243476  | 0.117516 | -841.125960  | 260.4 | 0.048344 | -841.195132  | 254.5 | 0 |
| T5; cis-anti                                       | BP86/def-TZVP      | -841.247755  | 0.117542 | -841.130213  | 262.8 | 0.049631 | -841.198124  | 255.8 | 0 |
| T5; trans-syn                                      | BP86/def-TZVP      | -841.251210  | 0.117606 | -841.133604  | 265.0 | 0.049605 | -841.201605  | 258.0 | 0 |
| T6; anti-anti                                      | BP86/def-TZVP      | -841.226314  | 0.116810 | -841.109504  | 250.6 | 0.048300 | -841.178014  | 243.9 | 0 |
| T6; anti-syn                                       | BP86/def-TZVP      | -841.226771  | 0.116831 | -841.109940  | 250.1 | 0.048584 | -841.178187  | 243.3 | 0 |
| T6; syn-anti                                       | BP86/def-TZVP      | -841.225384  | 0.116778 | -841.108606  | 249.3 | 0.047876 | -841.177508  | 242.9 | 0 |
| T6; syn-syn                                        | BP86/def-TZVP      | -841.226830  | 0.116809 | -841.110021  | 250.4 | 0.048811 | -841.178019  | 243.8 | 0 |
| <b>9</b>                                           |                    |              |          |              |       |          |              |       |   |
| Anion                                              |                    |              |          |              |       |          |              |       |   |
| symmetrical                                        | BP86/def-TZVP      | -1102.795471 | 0.141117 | -1102.654354 |       | 0.060374 | -1102.735097 |       | 0 |
|                                                    | BP86/def2-TZVPP    | -1102.843579 | 0.141008 | -1102.702571 |       | 0.060361 | -1102.783218 |       | 0 |
|                                                    | BP86/def2-TZVPPD   | -1102.847365 | 0.137131 | -1102.710234 |       | 0.061533 | -1102.785832 |       | 3 |
|                                                    | B3LYP/def2-TZVPPD  | -1102.175386 | 0.142990 | -1102.032396 |       | 0.063331 | -1102.112055 |       | 1 |
|                                                    | B3LYP/6-311+G(d,p) |              |          | -1102.498180 |       |          | -1102.577184 |       | 0 |
| asymmetrical                                       | G4(MP2)            |              |          | -1100.985095 |       |          | -1101.064353 |       | 0 |
|                                                    | BP86/def-TZVP      | -1102.792184 | 0.141033 | -1102.651151 |       | 0.060328 | -1102.731856 |       | 0 |
|                                                    | BP86/def2-TZVPP    | -1102.840299 | 0.140916 | -1102.699383 |       | 0.060307 | -1102.779992 |       | 0 |
| Neutral                                            |                    |              |          |              |       |          |              |       |   |
| T1; asymmetrical, anti-syn-syn; H facing backward  | BP86/def-TZVP      | -1103.206239 | 0.153113 | -1103.053126 | 253.7 | 0.070041 | -1103.136198 | 247.4 | 0 |
| T1; symmetrical, syn-syn-syn; H facing backward    | BP86/def-TZVP      | -1103.201043 | 0.153094 | -1103.047949 | 248.5 | 0.069752 | -1103.131292 | 242.3 | 0 |
| T1; symmetrical, anti-anti-anti; H facing backward | BP86/def-TZVP      | -1103.212726 | 0.153173 | -1103.059553 | 255.7 | 0.068203 | -1103.144523 | 250.6 | 0 |
|                                                    | BP86/def2-TZVPP    | -1103.260230 | 0.152924 | -1103.107306 | 255.5 | 0.067924 | -1103.192306 | 250.4 | 0 |
|                                                    | BP86/def2-TZVPPD   | -1103.263562 | 0.146096 | -1103.117466 | 255.5 | 0.071837 | -1103.191725 | 248.4 | 5 |
|                                                    | B3LYP/def2-TZVPPD  | -1102.597219 | 0.153142 | -1102.444077 | 258.3 | 0.076612 | -1102.520607 | 250.1 | 3 |
|                                                    | B3LYP/6-311+G(d,p) |              |          | -1102.906469 | 257.7 |          | -1102.989190 | 252.3 | 0 |
|                                                    | G4(MP2)            |              |          | -1101.404301 | 264.5 |          | -1101.487830 | 259.5 | 0 |
|                                                    | BP86/def-TZVP      | -1103.209141 | 0.153139 | -1103.056002 | 255.5 | 0.069185 | -1103.139956 | 249.8 | 0 |
| T1; asymmetrical, anti-anti-syn; H facing backward |                    |              |          |              |       |          |              |       |   |
| T3; trans-syn-syn, eclipsed(H)                     | BP86/def-TZVP      | -1103.199969 | 0.152604 | -1103.047365 | 248.1 | 0.069687 | -1103.130282 | 241.7 | 0 |
| T3; trans-syn-syn, anti(H)                         | BP86/def-TZVP      | -1103.196756 | 0.152712 | -1103.044044 | 246.0 | 0.069340 | -1103.127416 | 241.9 | 0 |
| T3; trans-syn-syn, syn(H)                          | BP86/def-TZVP      | -1103.198806 | 0.152859 | -1103.045947 | 247.2 | 0.069096 | -1103.129710 | 243.4 | 0 |
| T3; trans-syn-anti, syn(H)                         | BP86/def-TZVP      | -1103.200018 | 0.152818 | -1103.047200 | 250.0 | 0.068820 | -1103.131198 | 244.3 | 0 |
| T3; trans-syn-anti, anti(H)                        | BP86/def-TZVP      | -1103.198490 | 0.152737 | -1103.045753 | 249.1 | 0.070263 | -1103.128227 | 242.4 | 0 |
| T3; trans-syn-anti, eclipsed(H)                    | BP86/def-TZVP      | -1103.200162 | 0.152651 | -1103.047511 | 250.2 | 0.069647 | -1103.130515 | 243.9 | 0 |

|                                           |                 |              |          |              |       |          |              |       |   |
|-------------------------------------------|-----------------|--------------|----------|--------------|-------|----------|--------------|-------|---|
| T3; trans-anti-anti, syn(H)               | BP86/def-TZVP   | -1103.200024 | 0.152870 | -1103.047154 | 250.0 | 0.068900 | -1103.131124 | 244.3 | 0 |
| T3; trans-anti-anti, anti(H)              | BP86/def-TZVP   | -1103.200867 | 0.152814 | -1103.048053 | 250.5 | 0.070132 | -1103.130735 | 244.0 | 0 |
| T3; trans-anti-anti, syn(H) (symmetrical) | BP86/def-TZVP   | -1103.200881 | 0.152884 | -1103.047997 | 248.5 | 0.069013 | -1103.131868 | 242.7 | 0 |
| T3; trans-syn-anti, syn(H)                | BP86/def-TZVP   | -1103.199664 | 0.152923 | -1103.046741 | 249.7 | 0.068230 | -1103.131434 | 244.5 | 0 |
| T3; trans-syn-anti, anti(H)               | BP86/def-TZVP   | -1103.199154 | 0.152818 | -1103.046336 | 249.5 | 0.068959 | -1103.130195 | 243.7 | 0 |
| T3; trans-syn-anti, eclipsed(H)           | BP86/def-TZVP   | -1103.200466 | 0.152666 | -1103.04780  | 250.4 | 0.069360 | -1103.131106 | 244.3 | 0 |
| T4; trans-anti-syn                        | BP86/def-TZVP   | -1103.209442 | 0.152172 | -1103.057270 | 256.3 | 0.069649 | -1103.139793 | 249.7 | 0 |
| T4; trans-syn-anti                        | BP86/def-TZVP   | -1103.212194 | 0.152239 | -1103.059955 | 258.0 | 0.069886 | -1103.142308 | 251.3 | 0 |
| T4; trans-syn-anti                        | BP86/def2-TZVPP | -1103.262354 | 0.152148 | -1103.110206 | 259.3 | 0.069891 | -1103.192463 | 252.6 | 0 |
| T4; trans-syn-syn                         | BP86/def-TZVP   | -1103.211510 | 0.152215 | -1103.059295 | 257.6 | 0.070007 | -1103.141503 | 250.8 | 0 |
| T4; trans-anti-anti (symmetrical)         | BP86/def-TZVP   | -1103.211691 | 0.152234 | -1103.059457 | 255.7 | 0.069871 | -1103.141820 | 248.9 | 0 |
| T5; trans-anti-syn                        | BP86/def-TZVP   | -1103.207395 | 0.152080 | -1103.055315 | 255.1 | 0.069530 | -1103.137865 | 248.5 | 0 |
| T5; trans-syn-anti                        | BP86/def-TZVP   | -1103.206349 | 0.152192 | -1103.054157 | 254.4 | 0.068314 | -1103.138035 | 248.6 | 0 |
| T5; trans-syn-syn                         | BP86/def-TZVP   | -1103.205257 | 0.152111 | -1103.053146 | 253.7 | 0.068835 | -1103.136422 | 247.6 | 0 |
| T5; trans-anti-anti (symmetrical)         | BP86/def-TZVP   | -1103.209401 | 0.152131 | -1103.05727  | 254.3 | 0.069643 | -1103.139758 | 247.6 | 0 |
| T6; anti-anti-syn                         | BP86/def-TZVP   | -1103.189712 | 0.151375 | -1103.038337 | 244.4 | 0.068950 | -1103.120762 | 237.8 | 0 |
| T6; anti-syn-anti                         | BP86/def-TZVP   | -1103.190252 | 0.151366 | -1103.038886 | 244.8 | 0.068512 | -1103.121740 | 238.4 | 0 |
| T6; anti-syn-syn                          | BP86/def-TZVP   | -1103.190605 | 0.151374 | -1103.039231 | 245.0 | 0.069214 | -1103.121391 | 238.2 | 0 |
| T6; anti-anti-anti (symmetrical)          | BP86/def-TZVP   | -1103.191634 | 0.151417 | -1103.040217 | 243.6 | 0.068231 | -1103.123403 | 237.4 | 0 |

## 10

### Anion

#### Pyramidal

|                    |             |          |             |  |          |             |  |   |
|--------------------|-------------|----------|-------------|--|----------|-------------|--|---|
| BP86/def-TZVP      | -396.545269 | 0.046817 | -396.498452 |  | 0.002491 | -396.542778 |  | 0 |
| BP86/def2-TZVPP    | -396.560182 | 0.046745 | -396.513437 |  | 0.002409 | -396.557773 |  | 0 |
| BP86/def2-TZVPPD   | -396.562211 | 0.046729 | -396.515482 |  | 0.002381 | -396.559830 |  | 0 |
| B3LYP/def2-TZVPPD  | -396.337980 | 0.047854 | -396.290126 |  | 0.003954 | -396.334026 |  | 0 |
| B3LYP/6-311+G(d,p) |             |          | -396.461507 |  |          | -396.505256 |  | 0 |
| G4(MP2)            |             |          | -395.913365 |  |          | -395.957143 |  | 0 |
| W1RO               |             |          | -396.503497 |  |          | -396.547444 |  | 0 |
| CBS-APNO           |             |          | -396.354140 |  |          | -396.397710 |  | 0 |

#### Neutral

#### T2

|                    |             |          |             |       |          |             |       |   |
|--------------------|-------------|----------|-------------|-------|----------|-------------|-------|---|
| BP86/def-TZVP      | -396.980622 | 0.057684 | -396.922938 | 267.8 | 0.011796 | -396.968826 | 261.1 | 0 |
| BP86/def2-TZVPP    | -396.997238 | 0.057550 | -396.939688 | 269.0 | 0.011550 | -396.985688 | 262.2 | 0 |
| BP86/def2-TZVPPD   | -396.998472 | 0.057531 | -396.940941 | 268.5 | 0.011528 | -396.986944 | 261.7 | 0 |
| B3LYP/def2-TZVPPD  | -396.772719 | 0.059001 | -396.713718 | 267.3 | 0.013657 | -396.759062 | 260.4 | 0 |
| B3LYP/6-311+G(d,p) |             |          | -396.882396 | 265.6 |          | -396.927541 | 258.7 | 0 |
| G4(MP2)            |             |          | -396.334209 | 265.6 |          | -396.379514 | 258.8 | 0 |
| W1RO               |             |          | -396.924338 | 265.6 |          | -396.969744 | 258.7 | 0 |
| CBS-APNO           |             |          | -396.775450 | 265.9 |          | -396.820224 | 258.9 | 0 |

## 11

Anion

|                        |                    |             |          |             |       |          |             |       |   |
|------------------------|--------------------|-------------|----------|-------------|-------|----------|-------------|-------|---|
|                        | BP86/def-TZVP      | -658.513570 | 0.081425 | -658.432145 |       | 0.021771 | -658.491798 |       | 0 |
|                        | BP86/def2-TZVPP    | -658.540177 | 0.081328 | -658.458849 |       | 0.021683 | -658.518494 |       | 0 |
|                        | BP86/def2-TZVPPD   | -658.542757 | 0.081235 | -658.461522 |       | 0.020935 | -658.521822 |       | 0 |
|                        | B3LYP/def2-TZVPPD  | -658.157888 | 0.083339 | -658.074549 |       | 0.024135 | -658.133753 |       | 0 |
|                        | B3LYP/6-311+G(d,p) |             |          | -658.356677 |       |          | -658.415158 |       | 0 |
|                        | G4(MP2)            |             |          | -657.449462 |       |          | -657.508125 |       | 0 |
|                        | CBS-APNO           |             |          | -658.186709 |       |          | -658.244858 |       | 0 |
| T2; protonated on CN-1 | BP86/def-TZVP      | -658.940838 | 0.092376 | -658.848462 | 262.7 | 0.031236 | -658.909602 | 255.9 | 0 |
| T2; protonated on CN-2 | BP86/def-TZVP      | -658.941348 | 0.092348 | -658.849000 | 263.1 | 0.031355 | -658.909993 | 256.1 | 0 |
| T2; protonated on CN-3 | BP86/def-TZVP      | -658.941347 | 0.092350 | -658.848997 | 263.1 | 0.031310 | -658.910037 | 256.2 | 0 |
|                        | BP86/def2-TZVPP    | -658.969658 | 0.092197 | -658.877461 | 264.2 | 0.030977 | -658.938681 | 257.4 | 0 |
|                        | BP86/def2-TZVPPD   | -658.971598 | 0.092124 | -658.879474 | 263.7 | 0.029584 | -658.942014 | 257.4 | 0 |
|                        | B3LYP/def2-TZVPPD  | -658.585050 | 0.094574 | -658.490476 | 262.5 | 0.033781 | -658.551269 | 255.7 | 0 |
|                        | B3LYP/6-311+G(d,p) |             |          | -658.769801 | 260.7 |          | -658.829731 | 253.9 | 0 |
|                        | G4(MP2)            |             |          | -657.862713 | 260.8 |          | -657.923005 | 254.1 | 0 |
|                        | CBS-APNO           |             |          | -658.599433 | 260.5 |          | -658.658830 | 253.5 | 0 |
| T4                     | BP86/def-TZVP      | -658.908394 | 0.091647 | -658.816747 | 242.8 | 0.029403 | -658.878991 | 236.7 | 0 |
| T5                     | BP86/def-TZVP      | -658.919180 | 0.091892 | -658.827288 | 249.4 | 0.030224 | -658.888956 | 242.9 | 0 |
| T6                     | BP86/def-TZVP      | -658.922111 | 0.091737 | -658.830374 | 251.4 | 0.029857 | -658.892254 | 245.0 | 0 |

## 12

Part of the name in () indicates that this group weakly exhibits this conformation.

Anion

|                                  |                    |             |          |             |       |          |             |       |   |
|----------------------------------|--------------------|-------------|----------|-------------|-------|----------|-------------|-------|---|
| anti-syn; asymmetric             | BP86/def-TZVP      | -920.479451 | 0.116046 | -920.363405 |       | 0.041524 | -920.437927 |       | 0 |
|                                  | BP86/def2-TZVPP    | -920.517651 | 0.115928 | -920.401723 |       | 0.041507 | -920.476144 |       | 0 |
|                                  | BP86/def2-TZVPPD   | -920.520919 | 0.114788 | -920.406131 |       | 0.043038 | -920.477881 |       | 1 |
|                                  | B3LYP/def2-TZVPPD  | -919.975370 | 0.117884 | -919.857486 |       | 0.047633 | -919.927737 |       | 1 |
|                                  | B3LYP/6-311+G(d,p) |             |          | -920.249602 |       |          | -920.322557 |       | 0 |
|                                  | G4(MP2)            |             |          | -918.985830 |       |          | -919.059162 |       | 0 |
| syn-syn; symmetric               | BP86/def-TZVP      | -920.480079 | 0.116042 | -920.364037 |       | 0.041996 | -920.438082 |       | 0 |
| anti-anti; symmetric             | BP86/def-TZVP      | -920.477709 | 0.116039 | -920.361670 |       | 0.040930 | -920.436779 |       | 0 |
| Neutral                          |                    |             |          |             |       |          |             |       |   |
| T2; protonated on CN-1; anti-syn | BP86/def-TZVP      | -920.900635 | 0.126969 | -920.773666 | 234.9 | 0.051317 | -920.849318 | 251.9 | 0 |
|                                  | BP86/def2-TZVPP    | -920.940491 | 0.126797 | -920.813694 | 260.0 | 0.051106 | -920.889385 | 253.0 | 0 |

|                                         |                    |              |          |              |       |          |              |       |   |
|-----------------------------------------|--------------------|--------------|----------|--------------|-------|----------|--------------|-------|---|
|                                         | BP86/def2-TZVPPD   | -920.943225  | 0.125669 | -920.817556  | 259.7 | 0.052820 | -920.890405  | 252.6 | 1 |
|                                         | B3LYP/def2-TZVPPD  | -920.395797  | 0.129116 | -920.266681  | 258.3 | 0.057846 | -920.337951  | 251.1 | 1 |
|                                         | B3LYP/6-311+G(d,p) |              |          | -920.655992  | 256.5 |          | -920.729905  | 249.3 | 0 |
|                                         | G4(MP2)            |              |          | -919.392932  | 256.9 |          | -919.467218  | 249.8 | 0 |
| T2; protonated on CN-1; syn-syn         | BP86/def-TZVP      | -920.899040  | 0.105182 | -920.793859  | 271.2 | 0.051588 | -920.847452  | 250.6 | 0 |
| T2; protonated on CN-1; rather anti-syn | BP86/def-TZVP      | -920.898872  | 0.105224 | -920.793649  | 271.5 | 0.051486 | -920.847386  | 250.7 | 0 |
| T2; protonated on CN-2; syn-syn         | BP86/def-TZVP      | -920.899030  | 0.105162 | -920.793868  | 271.2 | 0.051531 | -920.847499  | 250.6 | 0 |
| T2; protonated on CN-2; anti-syn        | BP86/def-TZVP      | -920.900642  | 0.105228 | -920.795414  | 272.6 | 0.051384 | -920.849258  | 251.8 | 0 |
| T2; protonated on CN-2; syn-anti        | BP86/def-TZVP      | -920.898869  | 0.105221 | -920.793648  | 271.5 | 0.051485 | -920.847384  | 250.7 | 0 |
| T2; protonated on CN-2; anti-anti       | BP86/def-TZVP      | -920.898867  | 0.105212 | -920.793655  | 272.6 | 0.051367 | -920.847500  | 251.5 | 0 |
| T4; cis-anti                            | BP86/def-TZVP      | -920.868716  | 0.126334 | -920.742382  | 239.3 | 0.049523 | -920.819194  | 233.0 | 0 |
| T4; cis-syn                             | BP86/def-TZVP      | -920.870921  | 0.126332 | -920.744589  | 240.3 | 0.050104 | -920.820817  | 233.9 | 0 |
| T4; trans-anti                          | BP86/def-TZVP      | -920.867521  | 0.126327 | -920.741194  | 239.6 | 0.049105 | -920.818416  | 233.2 | 0 |
| T4; trans-syn                           | BP86/def-TZVP      | -920.871338  | 0.126363 | -920.744975  | 240.9 | 0.050045 | -920.821293  | 234.3 | 0 |
| T5; cis-anti                            | BP86/def-TZVP      | -920.879248  | 0.126479 | -920.752769  | 245.8 | 0.050980 | -920.828268  | 238.7 | 0 |
| T5; cis-anti                            | BP86/def-TZVP      | -920.879250  | 0.126483 | -920.752767  | 245.8 | 0.051020 | -920.828230  | 238.6 | 0 |
| T5; cis-syn                             | BP86/def-TZVP      | -920.882403  | 0.126559 | -920.755844  | 247.3 | 0.051861 | -920.830542  | 240.1 | 0 |
| T5; trans-syn                           | BP86/def-TZVP      | -920.879261  | 0.126487 | -920.752774  | 245.8 | 0.050956 | -920.828305  | 238.7 | 0 |
| T5; trans-anti                          | BP86/def-TZVP      | -920.882410  | 0.126563 | -920.755847  | 248.8 | 0.051841 | -920.830569  | 240.8 | 0 |
| T6; anti-syn                            | BP86/def-TZVP      | -920.878374  | 0.126397 | -920.751977  | 245.3 | 0.050228 | -920.828146  | 238.6 | 0 |
| T6; syn-syn                             | BP86/def-TZVP      | -920.884890  | 0.126515 | -920.758375  | 248.9 | 0.051292 | -920.833598  | 241.9 | 0 |
| T6; anti-anti                           | BP86/def-TZVP      | -920.881512  | 0.126457 | -920.755055  | 248.3 | 0.051020 | -920.830492  | 240.8 | 0 |
| T6; syn-anti                            | BP86/def-TZVP      | -920.881525  | 0.126455 | -920.755070  | 247.3 | 0.048885 | -920.832640  | 241.4 | 0 |
| <b>13</b>                               |                    |              |          |              |       |          |              |       |   |
| Anion                                   |                    |              |          |              |       |          |              |       |   |
| anti-syn-anti                           | BP86/def-TZVP      | -1182.441154 | 0.150607 | -1182.290547 |       | 0.062313 | -1182.378841 |       | 0 |
| anti-syn-syn                            | BP86/def-TZVP      | -1182.439360 | 0.150622 | -1182.288738 |       | 0.061437 | -1182.377923 |       | 0 |
| syn-syn-syn                             | BP86/def-TZVP      | -1182.438355 | 0.150622 | -1182.287733 |       | 0.062441 | -1182.375914 |       | 0 |
| anti-anti-anti                          | BP86/def-TZVP      | -1182.441940 | 0.150625 | -1182.291315 |       | 0.061703 | -1182.380236 |       | 0 |
|                                         | BP86/def2-TZVPP    | -1182.491515 | 0.150464 | -1182.341051 |       | 0.061578 | -1182.429937 |       | 0 |
|                                         | BP86/def2-TZVPPD   | -1182.495503 | 0.146694 | -1182.348809 |       | 0.064213 | -1182.431290 |       | 3 |
|                                         | B3LYP/def2-TZVPPD  | -1181.789127 | 0.152000 | -1181.637127 |       | 0.069697 | -1181.719430 |       | 2 |
|                                         | B3LYP/6-311+G(d,p) |              |          | -1182.138973 |       |          | -1182.225550 |       | 0 |
|                                         | G4(MP2)            |              |          | -1180.522159 |       |          | -1180.60907  |       | 0 |
| Neutral                                 |                    |              |          |              |       |          |              |       |   |
| T2, anti-anti-syn                       | BP86/def-TZVP      | -1182.856183 | 0.161547 | -1182.694636 | 255.0 | 0.072174 | -1182.784009 | 248.0 | 0 |
| T2, anti-anti-anti                      | BP86/def-TZVP      | -1182.858143 | 0.161563 | -1182.696580 | 255.8 | 0.071907 | -1182.786235 | 248.5 | 0 |
|                                         | BP86/def2-TZVPP    | -1182.909556 | 0.161371 | -1182.748185 | 257.0 | 0.071652 | -1182.837904 | 249.7 | 0 |

|                                   |                    |              |          |              |       |          |              |       |   |
|-----------------------------------|--------------------|--------------|----------|--------------|-------|----------|--------------|-------|---|
|                                   | BP86/def2-TZVPPD   | -1182.913153 | 0.157753 | -1182.755400 | 256.6 | 0.074609 | -1182.838544 | 249.3 | 3 |
|                                   | B3LYP/def2-TZVPPD  | -1182.204831 | 0.163367 | -1182.041464 | 255.2 | 0.079639 | -1182.125192 | 248.3 | 2 |
|                                   | B3LYP/6-311+G(d,p) |              |          | -1182.540316 | 253.3 |          | -1182.627589 | 246.0 | 0 |
|                                   | G4(MP2)            |              |          | -1180.925138 | 254.4 |          | -1181.012757 | 247.0 | 0 |
| T2, anti-syn-syn                  | BP86/def-TZVP      | -1182.853481 | 0.133972 | -1182.719509 | 271.8 | 0.071292 | -1182.782189 | 247.4 | 0 |
| T2, syn-syn-syn                   | BP86/def-TZVP      | -1182.851293 | 0.133979 | -1182.717314 | 271.0 | 0.070890 | -1182.780403 | 247.5 | 0 |
| T4, trans-syn-anti                | BP86/def-TZVP      | -1182.828096 | 0.161027 | -1182.667069 | 238.9 | 0.071031 | -1182.757065 | 231.6 | 0 |
| T4; cis-syn-anti                  | BP86/def-TZVP      | -1182.826657 | 0.160997 | -1182.665660 | 238.0 | 0.070428 | -1182.756229 | 231.1 | 0 |
| T4; trans-syn-syn                 | BP86/def-TZVP      | -1182.825689 | 0.160988 | -1182.664701 | 237.4 | 0.069339 | -1182.756350 | 231.2 | 0 |
| T4; cis-syn-syn (symmetrical)     | BP86/def-TZVP      | -1182.824790 | 0.161013 | -1182.663777 | 237.4 | 0.071216 | -1182.753574 | 230.7 | 0 |
| T4; trans-anti-anti (symmetrical) | BP86/def-TZVP      | -1182.827499 | 0.160992 | -1182.666507 | 236.9 | 0.070393 | -1182.757106 | 230.2 | 0 |
| T4; cis-anti-anti                 | BP86/def-TZVP      | -1182.827008 | 0.160928 | -1182.666080 | 237.1 | 0.070756 | -1182.756252 | 230.5 | 0 |
| T4; trans-anti-syn                | BP86/def-TZVP      | -1182.824841 | 0.160906 | -1182.663935 | 235.8 | 0.070358 | -1182.754483 | 229.4 | 0 |
| T4; cis-anti-syn                  | BP86/def-TZVP      | -1182.823087 | 0.160909 | -1182.662178 | 235.8 | 0.069331 | -1182.753756 | 229.6 | 0 |
| T5; trans-(anti)-anti             | BP86/def-TZVP      | -1182.839418 | 0.161154 | -1182.678264 | 244.8 | 0.072996 | -1182.766422 | 236.9 | 0 |
| T5; cis-syn-anti                  | BP86/def-TZVP      | -1182.829673 | 0.160997 | -1182.668676 | 238.3 | 0.072226 | -1182.757447 | 230.4 | 0 |
| T5; trans-(anti)-syn              | BP86/def-TZVP      | -1182.836788 | 0.161077 | -1182.675711 | 244.9 | 0.072117 | -1182.764671 | 237.7 | 0 |
| T5; cis-syn-(syn)                 | BP86/def-TZVP      | -1182.828933 | 0.161002 | -1182.667931 | 239.4 | 0.072043 | -1182.756890 | 231.5 | 0 |
| T5; trans-anti-anti               | BP86/def-TZVP      | -1182.838821 | 0.161164 | -1182.677657 | 244.4 | 0.072667 | -1182.766154 | 236.8 | 0 |
| T5; cis-anti-anti                 | BP86/def-TZVP      | -1182.830267 | 0.160984 | -1182.669283 | 240.3 | 0.071737 | -1182.758530 | 232.6 | 0 |
| T5; trans-anti-syn                | BP86/def-TZVP      | -1182.835720 | 0.161049 | -1182.674671 | 242.5 | 0.071688 | -1182.764032 | 235.4 | 0 |
| T5; cis-anti-(anti)               | BP86/def-TZVP      | -1182.830196 | 0.161009 | -1182.669187 | 240.2 | 0.072142 | -1182.758054 | 232.3 | 0 |
| T6; trans-syn-anti                | BP86/def-TZVP      | -1182.837019 | 0.161070 | -1182.675949 | 243.3 | 0.071753 | -1182.765266 | 236.2 | 0 |
| T6; cis-(anti)-anti               | BP86/def-TZVP      | -1182.838672 | 0.161136 | -1182.677536 | 245.5 | 0.072262 | -1182.766410 | 237.5 | 0 |
| T6; trans-syn-(syn)               | BP86/def-TZVP      | -1182.836061 | 0.161039 | -1182.675022 | 243.9 | 0.071390 | -1182.764671 | 236.4 | 0 |
| T6; cis-syn-syn (symmetrical)     | BP86/def-TZVP      | -1182.835070 | 0.161092 | -1182.673978 | 243.9 | 0.071627 | -1182.763443 | 236.9 | 0 |
| T6; trans-anti-anti (symmetrical) | BP86/def-TZVP      | -1182.835177 | 0.161021 | -1182.674156 | 241.7 | 0.069689 | -1182.765488 | 235.5 | 0 |
| T6; cis-anti-anti                 | BP86/def-TZVP      | -1182.840422 | 0.161110 | -1182.679312 | 245.4 | 0.072262 | -1182.768160 | 238.0 | 0 |
| T6; trans-anti-(anti)             | BP86/def-TZVP      | -1182.834598 | 0.160997 | -1182.673601 | 241.4 | 0.069680 | -1182.764918 | 235.1 | 0 |
| T6; cis-ani-syn                   | BP86/def-TZVP      | -1182.835817 | 0.161050 | -1182.674767 | 243.7 | 0.070796 | -1182.765021 | 236.6 | 0 |

#### 14

Anion

|                                           |                  |              |          |              |  |          |              |  |   |
|-------------------------------------------|------------------|--------------|----------|--------------|--|----------|--------------|--|---|
| conformer I                               | BP86/def-TZVP    | -1444.394467 | 0.185116 | -1444.209351 |  | 0.085235 | -1444.309232 |  | 0 |
| conformer II                              | BP86/def-TZVP    | -1444.394606 | 0.185057 | -1444.209549 |  | 0.084463 | -1444.310143 |  | 0 |
|                                           | BP86/def2-TZVPP  | -1444.455659 | 0.184848 | -1444.270811 |  | 0.084199 | -1444.371460 |  | 0 |
| conformer III; most stable from CosmoConf | BP86/def-TZVP    | -1444.398421 | 0.185087 | -1444.213334 |  | 0.085113 | -1444.313308 |  | 0 |
|                                           | BP86/def2-TZVPP  | -1444.459443 | 0.184893 | -1444.274550 |  | 0.084896 | -1444.374547 |  | 0 |
|                                           | BP86/def2-TZVPPD | -1444.464317 | 0.172971 | -1444.291346 |  | 0.082882 | -1444.381435 |  | 8 |

|                   |                    |              |          |              |       |          |              |       |   |
|-------------------|--------------------|--------------|----------|--------------|-------|----------|--------------|-------|---|
|                   | B3LYP/6-311+G(d,p) |              |          | -1444.022448 |       |          | -1444.119902 |       | 0 |
| conformer IV      | BP86/def-TZVP      | -1444.398374 | 0.185060 | -1444.213314 |       | 0.085023 | -1444.313351 |       | 0 |
| Neutral           |                    |              |          |              |       |          |              |       |   |
| T4; conformer I   | BP86/def-TZVP      | -1444.773503 | 0.195401 | -1444.578102 | 232.9 | 0.092612 | -1444.680890 | 226.9 | 0 |
| T4; conformer I   | BP86/def-TZVP      | -1444.777754 | 0.195439 | -1444.582315 | 235.5 | 0.093606 | -1444.684148 | 229.0 | 0 |
| T4; conformer I   | BP86/def-TZVP      | -1444.777739 | 0.195433 | -1444.582306 | 235.5 | 0.093544 | -1444.684195 | 229.0 | 0 |
| T4; conformer I   | BP86/def-TZVP      | -1444.777746 | 0.195435 | -1444.582311 | 235.5 | 0.093557 | -1444.684189 | 229.0 | 0 |
| T4; conformer I   | BP86/def-TZVP      | -1444.777751 | 0.195439 | -1444.582312 | 235.5 | 0.093626 | -1444.684125 | 229.0 | 0 |
| T4; conformer II  | BP86/def-TZVP      | -1444.776399 | 0.195410 | -1444.580989 | 234.6 | 0.092180 | -1444.684219 | 228.5 | 0 |
| T4; conformer II  | BP86/def-TZVP      | -1444.776462 | 0.195377 | -1444.581085 | 234.6 | 0.092043 | -1444.684419 | 228.6 | 0 |
| T4; conformer II  | BP86/def-TZVP      | -1444.778075 | 0.195435 | -1444.582640 | 235.6 | 0.093099 | -1444.684976 | 228.9 | 0 |
| T4; conformer II  | BP86/def-TZVP      | -1444.774364 | 0.195388 | -1444.578976 | 233.3 | 0.092250 | -1444.682114 | 227.1 | 0 |
| T4; conformer III | BP86/def-TZVP      | -1444.780037 | 0.195406 | -1444.584631 | 234.5 | 0.092816 | -1444.687221 | 228.4 | 0 |
| T4; conformer III | BP86/def-TZVP      | -1444.780061 | 0.195416 | -1444.584645 | 234.5 | 0.092839 | -1444.687222 | 228.4 | 0 |
| T4; conformer III | BP86/def-TZVP      | -1444.780031 | 0.195411 | -1444.584620 | 234.5 | 0.092746 | -1444.687285 | 228.4 | 0 |
| T4; conformer III | BP86/def-TZVP      | -1444.780061 | 0.195425 | -1444.584636 | 234.5 | 0.092879 | -1444.687182 | 228.3 | 0 |
| T4; conformer IV  | BP86/def-TZVP      | -1444.780005 | 0.195393 | -1444.584612 | 234.5 | 0.092752 | -1444.687253 | 228.3 | 0 |
| T4; conformer IV  | BP86/def-TZVP      | -1444.780019 | 0.195394 | -1444.584625 | 234.5 | 0.092813 | -1444.687206 | 228.3 | 0 |
| T4; conformer IV  | BP86/def-TZVP      | -1444.780011 | 0.195390 | -1444.584621 | 234.5 | 0.092676 | -1444.687335 | 228.4 | 0 |
| T4; conformer IV  | BP86/def-TZVP      | -1444.780030 | 0.195399 | -1444.584631 | 234.5 | 0.092932 | -1444.687098 | 228.3 | 0 |
| T5; conformer I   | BP86/def-TZVP      | -1444.782104 | 0.195512 | -1444.586592 | 238.2 | 0.094211 | -1444.687893 | 231.3 | 0 |
| T5; conformer I   | BP86/def-TZVP      | -1444.781788 | 0.195468 | -1444.586320 | 238.0 | 0.093430 | -1444.688358 | 231.6 | 0 |
| T5; conformer I   | BP86/def-TZVP      | -1444.782106 | 0.195512 | -1444.586594 | 238.2 | 0.094322 | -1444.687784 | 231.3 | 0 |
| T5; conformer I   | BP86/def-TZVP      | -1444.782121 | 0.195520 | -1444.586601 | 238.2 | 0.094326 | -1444.687795 | 231.3 | 0 |
| T5; conformer II  | BP86/def-TZVP      | -1444.779463 | 0.195391 | -1444.584072 | 236.5 | 0.093368 | -1444.686095 | 229.6 | 0 |
| T5; conformer II  | BP86/def-TZVP      | -1444.777941 | 0.195409 | -1444.582532 | 235.5 | 0.092541 | -1444.685400 | 229.2 | 0 |
| T5; conformer II  | BP86/def-TZVP      | -1444.776606 | 0.195335 | -1444.581271 | 234.7 | 0.092698 | -1444.683908 | 228.3 | 0 |
| T5; conformer II  | BP86/def-TZVP      | -1444.777906 | 0.195387 | -1444.582519 | 235.5 | 0.093810 | -1444.684096 | 228.4 | 0 |
| T5; conformer III | BP86/def-TZVP      | -1444.782043 | 0.195481 | -1444.586562 | 235.7 | 0.093777 | -1444.688266 | 229.0 | 0 |
| T5; conformer III | BP86/def-TZVP      | -1444.782010 | 0.195459 | -1444.586551 | 235.7 | 0.093662 | -1444.688348 | 229.1 | 0 |
| T5; conformer III | BP86/def-TZVP      | -1444.782029 | 0.195452 | -1444.586577 | 235.7 | 0.093640 | -1444.688389 | 229.1 | 0 |
| T5; conformer III | BP86/def-TZVP      | -1444.782012 | 0.195470 | -1444.586542 | 235.7 | 0.093732 | -1444.688280 | 229.0 | 0 |
| T5; conformer IV  | BP86/def-TZVP      | -1444.782005 | 0.195466 | -1444.586539 | 235.7 | 0.093711 | -1444.688294 | 229.0 | 0 |
| T5; conformer IV  | BP86/def-TZVP      | -1444.781999 | 0.195457 | -1444.586542 | 235.7 | 0.093727 | -1444.688272 | 229.0 | 0 |
| T5; conformer IV  | BP86/def-TZVP      | -1444.782009 | 0.195445 | -1444.586564 | 235.7 | 0.093702 | -1444.688307 | 229.0 | 0 |
| T5; conformer IV  | BP86/def-TZVP      | -1444.782003 | 0.195454 | -1444.586549 | 235.7 | 0.093619 | -1444.688384 | 229.1 | 0 |
| T6; conformer I   | BP86/def-TZVP      | -1444.784589 | 0.195525 | -1444.589064 | 239.8 | 0.093804 | -1444.690785 | 233.1 | 0 |
| T6; conformer I   | BP86/def-TZVP      | -1444.784442 | 0.195508 | -1444.588934 | 239.7 | 0.093707 | -1444.690735 | 233.1 | 0 |
| T6; conformer I   | BP86/def-TZVP      | -1444.784664 | 0.195528 | -1444.589136 | 239.8 | 0.093856 | -1444.690808 | 233.2 | 0 |



|                                 |                    |              |          |              |           |            |              |       |    |
|---------------------------------|--------------------|--------------|----------|--------------|-----------|------------|--------------|-------|----|
| T6; conformer I                 | BP86/def-TZVP      | -1444.784659 | 0.195524 | -1444.589135 | 239.8     | 0.093813   | -1444.690846 | 233.2 | 0  |
| T6; conformer II                | BP86/def-TZVP      | -1444.786009 | 0.195494 | -1444.590515 | 240.5     | 0.093413   | -1444.692596 | 233.7 | 0  |
| T6; conformer II                | BP86/def-TZVP      | -1444.787859 | 0.195532 | -1444.592327 | 241.7     | 0.093479   | -1444.694380 | 234.8 | 0  |
| T6; conformer II                | BP86/def2-TZVPP    | -1444.851112 | 0.195292 | -1444.655820 | 243.1     | 0.093143   | -1444.757969 | 236.3 | 0  |
| T6; conformer II                | BP86/def-TZVP      | -1444.785172 | 0.195502 | -1444.589670 | 240.0     | 0.093229   | -1444.691943 | 233.3 | 0  |
| T6; conformer II                | BP86/def-TZVP      | -1444.782258 | 0.195434 | -1444.586824 | 238.2     | 0.092437   | -1444.689821 | 232.0 | 0  |
| T6; conformer III               | BP86/def-TZVP      | -1444.788364 | 0.195505 | -1444.592859 | 239.6     | 0.093675   | -1444.694689 | 233.0 | 0  |
| T6; conformer III               | BP86/def-TZVP      | -1444.788330 | 0.195495 | -1444.592835 | 239.6     | 0.093627   | -1444.694703 | 233.1 | 0  |
| T6; conformer III               | BP86/def-TZVP      | -1444.788342 | 0.195504 | -1444.592838 | 239.6     | 0.093634   | -1444.694708 | 233.1 | 0  |
| T6; conformer III               | BP86/def2-TZVPP    | -1444.851336 | 0.195272 | -1444.656064 | 240.9     | 0.093222   | -1444.758114 | 234.4 | 0  |
| T6; conformer III               | BP86/def2-TZVPPD   | -1444.855872 | 0.181074 | -1444.674798 | 242.1     | 0.094179   | -1444.761693 | 232.3 | 10 |
| T6; conformer III               | B3LYP/6-311+G(d,p) |              |          | -1444.396548 | 236.2     |            | -1444.495392 | 229.3 | 0  |
| T6; conformer III               | BP86/def-TZVP      | -1444.788306 | 0.195499 | -1444.592807 | 239.6     | 0.093513   | -1444.694793 | 233.1 | 0  |
| T6; conformer IV                | BP86/def-TZVP      | -1444.788302 | 0.195472 | -1444.592830 | 239.6     | 0.093564   | -1444.694738 | 233.0 | 0  |
| T6; conformer IV                | BP86/def-TZVP      | -1444.788326 | 0.195490 | -1444.592836 | 239.6     | 0.093656   | -1444.694670 | 233.0 | 0  |
| T6; conformer IV                | BP86/def-TZVP      | -1444.788334 | 0.195487 | -1444.592847 | 239.6     | 0.093615   | -1444.694719 | 233.0 | 0  |
| T6; conformer IV                | BP86/def-TZVP      | -1444.788288 | 0.195485 | -1444.592803 | 239.6     | 0.093496   | -1444.694792 | 233.1 | 0  |
| <b>15</b>                       |                    |              |          |              |           |            |              |       |    |
| Anion                           |                    |              |          |              |           |            |              |       |    |
|                                 | BP86/def-TZVP      | -92.891539   | 0.007963 | -92.883576   |           | -0.0143861 | -92.905925   |       | 0  |
|                                 | B3LYP/def2-TZVPPD  | -92.894504   | 0.007962 | -92.886542   |           | -0.014426  | -92.908930   |       | 0  |
|                                 | B3LYP/6-311+G(d,p) |              |          | -92.880338   |           |            | -92.902682   |       | 0  |
| Neutral                         |                    |              |          |              |           |            |              |       |    |
| C-N-H                           | BP86/def-TZVP      | -93.439333   | 0.018078 | -93.421255   | 338.87468 | 0.0009865  | -93.438347   | 327.8 | 0  |
| H-C-N                           | BP86/def-TZVP      | -93.463095   | 0.017952 | -93.445143   | 353.86422 | 0.0022777  | -93.460817   | 341.9 | 0  |
|                                 | B3LYP/def2-TZVPPD  | -93.466651   | 0.020417 | -93.446234   | 352.68775 | 0.005538   | -93.461113   | 340.2 | 0  |
|                                 | B3LYP/6-311+G(d,p) |              |          | -93.434649   | 349.31115 |            | -93.457492   | 341.9 | 0  |
| <b>16</b>                       |                    |              |          |              |           |            |              |       |    |
| Anion                           |                    |              |          |              |           |            |              |       |    |
|                                 | BP86/def-TZVP      | -354.899269  | 0.041981 | -354.857288  |           | 0.001916   | -354.897353  |       | 0  |
|                                 | B3LYP/def2-TZVPPD  | -354.914437  | 0.041953 | -354.872484  |           | 0.001571   | -354.912866  |       | 0  |
|                                 | B3LYP/6-311+G(d,p) |              |          | -354.811547  |           |            | -354.851410  |       | 0  |
| Neutral                         |                    |              |          |              |           |            |              |       |    |
| T1; C(CN) <sub>2</sub> =CH(CN)  | BP86/def-TZVP      | -355.437345  | 0.054687 | -355.382658  | 331.15071 | 0.014283   | -355.423061  | 323.6 | 0  |
|                                 | B3LYP/def2-TZVPPD  | -355.452729  | 0.054632 | -355.398097  | 331.30291 | 0.013783   | -355.438946  | 323.8 | 0  |
|                                 | B3LYP/6-311+G(d,p) |              |          | -355.336145  | 330.66624 |            | -355.376488  | 323.2 | 0  |
| T4; C(CN-H) <sub>2</sub> =C(CN) | BP86/def-TZVP      | -355.353640  | 0.052143 | -355.301497  | 280.22258 | 0.010405   | -355.343235  | 273.5 | 0  |

|                                 |               |             |          |             |           |          |             |       |   |
|---------------------------------|---------------|-------------|----------|-------------|-----------|----------|-------------|-------|---|
| T6; C(CN) <sub>2</sub> =C(CN-H) | BP86/def-TZVP | -355.393389 | 0.053931 | -355.339458 | 304.04308 | 0.012341 | -355.381049 | 297.2 | 0 |
| T5; C(CN-H) <sub>2</sub> =C(CN) | BP86/def-TZVP | -355.348482 | 0.052442 | -355.296040 | 276.79807 | 0.009942 | -355.338540 | 270.6 | 0 |

### 17

#### Dianion

|                                                     |                    |              |          |              |  |          |              |  |   |
|-----------------------------------------------------|--------------------|--------------|----------|--------------|--|----------|--------------|--|---|
| [B <sub>12</sub> (CN) <sub>12</sub> ] <sup>2-</sup> | BP86/def-TZVP      | -1413.480680 | 0.188055 | -1413.292625 |  | 0.091658 | -1413.389022 |  | 3 |
|                                                     | BP86/def-TZVP      | -1413.480695 | 0.188084 | -1413.292611 |  | 0.091703 | -1413.388992 |  | 3 |
|                                                     | B3LYP/def2-TZVPPD  | -1413.536355 | 0.186733 | -1413.349622 |  | 0.089620 | -1413.446735 |  | 3 |
|                                                     | B3LYP/6-311+G(d,p) |              |          | -1413.152635 |  |          | -1413.248443 |  |   |

#### Anion

|                                                                       |                    |              |          |              |       |          |              |       |   |
|-----------------------------------------------------------------------|--------------------|--------------|----------|--------------|-------|----------|--------------|-------|---|
| [B <sub>12</sub> (CN) <sub>12</sub> ] <sup>-</sup> ; protonated on CN | BP86/def-TZVP      | -1413.964512 | 0.203011 | -1413.761501 | 295.7 | 0.100872 | -1413.863640 | 291.5 | 0 |
|                                                                       | B3LYP/def2-TZVPPD  | -1414.021731 | 0.198238 | -1413.823493 | 298.8 | 0.099193 | -1413.922538 | 292.3 | 3 |
|                                                                       | B3LYP/6-311+G(d,p) |              |          | -1413.620604 | 295.1 |          | -1413.718562 | 288.7 | 0 |

### 18

#### Neutral

|                                                                           |                    |              |          |              |       |          |              |       |   |
|---------------------------------------------------------------------------|--------------------|--------------|----------|--------------|-------|----------|--------------|-------|---|
| B <sub>12</sub> (CN) <sub>12</sub> H <sub>2</sub> , H-s diide by side     | BP86/def-TZVP      | -1414.350481 | 0.212976 | -1414.137505 | 237.4 | 0.108904 | -1414.241577 | 230.9 | 0 |
| B <sub>12</sub> (CN) <sub>12</sub> H <sub>2</sub> , 1 B between two H-s   | BP86/def-TZVP      | -1414.362171 | 0.210972 | -1414.151199 | 246.0 | 0.109079 | -1414.253092 | 238.1 | 2 |
|                                                                           | BP86/def-TZVP      | -1414.362171 | 0.210013 | -1414.152158 |       |          | -1414.362171 |       | 3 |
| B <sub>12</sub> (CN) <sub>12</sub> H <sub>2</sub> , 2 B-s between two H-s | BP86/def-TZVP      | -1414.365218 | 0.213296 | -1414.151922 | 246.5 | 0.109359 | -1414.255859 | 239.8 | 0 |
|                                                                           | B3LYP/def2-TZVPPD  | -1414.423871 | 0.210204 | -1414.213667 | 246.3 | 0.106791 | -1414.317080 | 241.3 | 2 |
|                                                                           | B3LYP/6-311+G(d,p) |              |          | -1414.006915 | 243.9 |          | -1414.106517 | 237.2 |   |

### 19

#### Anion

|                                                     |                    |              |          |              |  |          |              |  |   |
|-----------------------------------------------------|--------------------|--------------|----------|--------------|--|----------|--------------|--|---|
| [CB <sub>11</sub> (CN) <sub>12</sub> ] <sup>-</sup> | BP86/def-TZVP      | -1426.559923 | 0.192538 | -1426.367385 |  | 0.093785 | -1426.466138 |  | 0 |
|                                                     | B3LYP/def2-TZVPPD  | -1426.616784 | 0.191696 | -1426.425088 |  | 0.090700 | -1426.526084 |  | 0 |
|                                                     | B3LYP/6-311+G(d,p) |              |          | -1426.217878 |  |          | -1426.314578 |  | 0 |

#### Neutral

|                                                                      |                    |              |          |              |       |          |              |       |   |
|----------------------------------------------------------------------|--------------------|--------------|----------|--------------|-------|----------|--------------|-------|---|
| CB <sub>11</sub> (CN) <sub>12</sub> H, H on CN that is on C          | BP86/def-TZVP      | -1426.917444 | 0.202578 | -1426.714866 | 219.5 | 0.101714 | -1426.815730 | 213.1 | 0 |
| CB <sub>11</sub> (CN) <sub>12</sub> H, H on CN that is on 1st row B  | BP86/def-TZVP      | -1426.930505 | 0.203348 | -1426.727157 | 227.2 | 0.103048 | -1426.827457 | 220.5 | 0 |
| CB <sub>11</sub> (CN) <sub>12</sub> H, H on CN that is on 2nd row B  | BP86/def-TZVP      | -1426.938914 | 0.203342 | -1426.735572 | 232.5 | 0.102888 | -1426.836026 | 225.8 | 0 |
| CB <sub>11</sub> (CN) <sub>12</sub> H, H on CN that is on opposite C | BP86/def-TZVP      | -1426.941727 | 0.203149 | -1426.738578 | 234.4 | 0.102169 | -1426.839558 | 228.0 | 0 |
|                                                                      | B3LYP/def2-TZVPPD  | -1427.000134 | 0.202346 | -1426.797788 | 235.4 | 0.098932 | -1426.901202 | 229.1 | 0 |
|                                                                      | B3LYP/6-311+G(d,p) |              |          | -1426.584522 | 231.6 |          | -1426.683007 | 224.9 | 0 |

**Table S10.** DataDOI data repository filenames of title compounds in referred folders. See <http://dx.doi.org/10.23673/re-436>.

| Compound | Basis set          | GEO file    | FR file    | Folder | Cosmo file<br>in CN_Cosmo folder |
|----------|--------------------|-------------|------------|--------|----------------------------------|
| <b>1</b> |                    |             |            |        |                                  |
| Anion    | BP86/def-TZVP      | job_GEO_238 | job_SP_239 | CN_2   | COSMO-BP-TZVPD-FINE_17           |
|          | BP86/def2-TZVPP    | job_GEO_491 | job_SP_497 | CN_1   |                                  |
|          | BP86/def2-TZVPPD   | job_GEO_715 | job_SP_717 | CN_1   |                                  |
|          | B3LYP/def2-TZVPPD  | job_GEO_719 | job_SP_723 | CN_1   |                                  |
|          | B3LYP/6-311+G(d,p) | JOB_1000    |            | CN_GAU |                                  |
|          | G4(MP2)            | JOB_1000_1  |            | CN_GAU |                                  |
|          | W1RO               | JOB_1000_2  |            | CN_GAU |                                  |
|          | CBS-APNO           | JOB_1000_3  |            | CN_GAU |                                  |
| Neutral  |                    |             |            |        |                                  |
| T1       | BP86/def-TZVP      | job_GEO_242 | job_SP_243 | CN_2   | COSMO-BP-TZVPD-FINE_19           |
| T2       | BP86/def-TZVP      | job_GEO_361 | job_SP_362 | CN_2   |                                  |
|          | BP86/def2-TZVPP    | job_GEO_492 | job_SP_498 | CN_1   |                                  |
|          | BP86/def2-TZVPPD   | job_GEO_716 | job_SP_718 | CN_1   |                                  |
|          | B3LYP/def2-TZVPPD  | job_GEO_720 | job_SP_724 | CN_1   |                                  |
|          | B3LYP/6-311+G(d,p) | JOB_1001    |            | CN_GAU |                                  |
|          | G4(MP2)            | JOB_1001_1  |            | CN_GAU |                                  |
|          | W1RO               | JOB_1001_2  |            | CN_GAU |                                  |
|          | CBS-APNO           | JOB_1001_3  |            | CN_GAU |                                  |
| <b>2</b> |                    |             |            |        |                                  |
| Anion    | BP86/def-TZVP      | job_GEO_223 | job_SP_231 | CN_2   | COSMO-BP-TZVPD-FINE_21           |
|          | BP86/def2-TZVPP    | job_GEO_501 | job_SP_503 | CN_1   |                                  |
|          | BP86/def2-TZVPPD   | job_GEO_725 | job_SP_729 | CN_1   |                                  |
|          | B3LYP/def2-TZVPPD  | job_GEO_727 | job_SP_731 | CN_1   |                                  |
|          | B3LYP/6-311+G(d,p) | JOB_1002    |            | CN_GAU |                                  |
|          | G4(MP2)            | JOB_1002_1  |            | CN_GAU |                                  |
|          | W1RO               | JOB_1002_2  |            | CN_GAU |                                  |
|          | CBS-APNO           | JOB_1002_3  |            | CN_GAU |                                  |
| Neutral  |                    |             |            |        |                                  |
| T1       | BP86/def-TZVP      | job_GEO_224 | job_SP_232 | CN_2   | COSMO-BP-TZVPD-FINE_23           |
|          | BP86/def2-TZVPP    | job_GEO_502 | job_SP_505 | CN_1   |                                  |
|          | BP86/def2-TZVPPD   | job_GEO_726 | job_SP_730 | CN_1   |                                  |
|          | B3LYP/def2-TZVPPD  | job_GEO_728 | job_SP_732 | CN_1   |                                  |

|                                                                |                    |             |            |        |                         |
|----------------------------------------------------------------|--------------------|-------------|------------|--------|-------------------------|
| T3; eclipsed(H)<br>T3; syn(H)<br>T3; anti(H)<br>T4<br>T5<br>T6 | B3LYP/6-311+G(d,p) | JOB_1003    |            | CN_GAU |                         |
|                                                                | G4(MP2)            | JOB_1003_1  |            | CN_GAU |                         |
|                                                                | W1RO               | JOB_1003_2  |            | CN_GAU |                         |
|                                                                | CBS-APNO           | JOB_1003_3  |            | CN_GAU |                         |
|                                                                | BP86/def-TZVP      | job_GEO_225 | job_SP_233 | CN_2   |                         |
|                                                                | BP86/def-TZVP      | job_GEO_78  | job_SP_80  | CN_1   |                         |
|                                                                | BP86/def-TZVP      | job_GEO_82  | job_SP_83  | CN_1   |                         |
|                                                                | BP86/def-TZVP      | job_GEO_32  | job_SP_34  | CN_1   | COSMO-BP-TZVPD-FINE_316 |
|                                                                | BP86/def-TZVP      | job_GEO_226 | job_SP_234 | CN_2   | COSMO-BP-TZVPD-FINE_314 |
|                                                                | BP86/def-TZVP      | job_GEO_33  | job_SP_35  | CN_1   |                         |
| <b>3</b>                                                       |                    |             |            |        |                         |
| Anion                                                          |                    |             |            |        |                         |
|                                                                | BP86/def-TZVP      | job_GEO_363 | job_SP_364 | CN_2   |                         |
|                                                                | BP86/def2-TZVPP    | job_GEO_506 | job_SP_508 | CN_1   | COSMO-BP-TZVPD-FINE_26  |
|                                                                | BP86/def2-TZVPPD   | job_GEO_733 | job_SP_760 | CN_1   |                         |
|                                                                | B3LYP/def2-TZVPPD  | job_GEO_734 | job_SP_761 | CN_1   |                         |
|                                                                | B3LYP/6-311+G(d,p) | JOB_1004    |            | CN_GAU |                         |
|                                                                | G4(MP2)            | JOB_1004_1  |            | CN_GAU |                         |
|                                                                | W1RO               | JOB_1004_2  |            | CN_GAU |                         |
|                                                                | CBS-APNO           | JOB_1004_3  |            | CN_GAU |                         |
|                                                                |                    |             |            |        |                         |
| Neutral                                                        |                    |             |            |        |                         |
|                                                                | BP86/def-TZVP      | job_GEO_247 | job_SP_250 | CN_2   |                         |
|                                                                | BP86/def-TZVP      | job_GEO_248 | job_SP_251 | CN_2   |                         |
|                                                                | BP86/def2-TZVPP    | job_GEO_507 | job_SP_509 | CN_1   | COSMO-BP-TZVPD-FINE_28  |
|                                                                | BP86/def2-TZVPPD   | job_GEO_735 | job_SP_762 | CN_1   |                         |
|                                                                | B3LYP/def2-TZVPPD  | job_GEO_736 | job_SP_763 | CN_1   |                         |
|                                                                | B3LYP/6-311+G(d,p) | JOB_1005    |            | CN_GAU |                         |
|                                                                | G4(MP2)            | JOB_1005_1  |            | CN_GAU |                         |
|                                                                | W1RO               | JOB_1005_2  |            | CN_GAU |                         |
|                                                                | CBS-APNO           | JOB_1005_3  |            | CN_GAU |                         |
|                                                                |                    |             |            |        |                         |
| <b>4</b>                                                       |                    |             |            |        |                         |
| Anion<br>anti                                                  |                    |             |            |        |                         |
|                                                                | BP86/def-TZVP      | job_GEO_254 | job_SP_263 | CN_2   |                         |
|                                                                | BP86/def2-TZVPP    | job_GEO_510 | job_SP_515 | CN_1   | COSMO-BP-TZVPD-FINE_116 |
|                                                                | BP86/def2-TZVPPD   | job_GEO_737 | job_SP_776 | CN_1   |                         |
|                                                                | B3LYP/def2-TZVPPD  | job_GEO_738 | job_SP_777 | CN_1   |                         |
|                                                                | B3LYP/6-311+G(d,p) | JOB_1006    |            | CN_GAU |                         |

|                                       |                    |             |            |        |                         |
|---------------------------------------|--------------------|-------------|------------|--------|-------------------------|
|                                       | G4(MP2)            | JOB_1006_1  |            | CN_GAU |                         |
|                                       | W1RO               | JOB_1006_2  |            | CN_GAU |                         |
|                                       | CBS-APNO           | JOB_1006_3  |            | CN_GAU |                         |
| syn                                   | BP86/def-TZVP      | job_GEO_332 | job_SP_340 | CN_2   |                         |
|                                       | BP86/def2-TZVPP    | job_GEO_511 | job_SP_516 | CN_1   | COSMO-BP-TZVPD-FINE_30  |
| Neutral                               |                    |             |            |        |                         |
| T1; syn                               | BP86/def-TZVP      | job_GEO_255 | job_SP_264 | CN_2   |                         |
| T1; anti                              | BP86/def-TZVP      | job_GEO_333 | job_SP_341 | CN_2   |                         |
| T2; anti                              | BP86/def-TZVP      | job_GEO_258 | job_SP_267 | CN_2   |                         |
|                                       | BP86/def2-TZVPP    | job_GEO_514 | job_SP_518 | CN_1   | COSMO-BP-TZVPD-FINE_118 |
|                                       | BP86/def2-TZVPPD   | job_GEO_739 | job_SP_778 | CN_1   |                         |
|                                       | B3LYP/def2-TZVPPD  | job_GEO_740 | job_SP_779 | CN_1   |                         |
|                                       | B3LYP/6-311+G(d,p) | JOB_1007    |            | CN_GAU |                         |
|                                       | G4(MP2)            | JOB_1007_1  |            | CN_GAU |                         |
|                                       | W1RO               | JOB_1007_2  |            | CN_GAU |                         |
|                                       | CBS-APNO           | JOB_1007_3  |            | CN_GAU |                         |
| T2; syn                               | BP86/def-TZVP      | job_GEO_335 | job_SP_343 | CN_2   |                         |
|                                       | BP86/def2-TZVPP    | job_GEO_513 | job_SP_517 | CN_1   | COSMO-BP-TZVPD-FINE_32  |
| T3; trans, eclipsed(H)                | BP86/def-TZVP      | job_GEO_256 | job_SP_265 | CN_2   |                         |
| T3; trans, syn(H)                     | BP86/def-TZVP      | job_GEO_85  | job_SP_95  | CN_1   |                         |
| T3; cis, anti(H)                      | BP86/def-TZVP      | job_GEO_22  | job_SP_23  | CN_1   |                         |
| T3; cis, syn(H)                       | BP86/def-TZVP      | job_GEO_84  | job_SP_94  | CN_1   |                         |
| T4; trans                             | BP86/def-TZVP      | job_GEO_257 | job_SP_266 | CN_2   |                         |
| T4; cis                               | BP86/def-TZVP      | job_GEO_334 | job_SP_342 | CN_2   |                         |
| T5; trans                             | BP86/def-TZVP      | job_GEO_37  | job_SP_45  | CN_1   |                         |
| T5; cis                               | BP86/def-TZVP      | job_GEO_38  | job_SP_42  | CN_1   |                         |
| T6; anti                              | BP86/def-TZVP      | job_GEO_40  | job_SP_44  | CN_1   |                         |
| T6; syn                               | BP86/def-TZVP      | job_GEO_39  | job_SP_43  | CN_1   |                         |
| 5                                     |                    |             |            |        |                         |
| Anion                                 |                    |             |            |        |                         |
| Anion; anti-syn (syn facing forward)  | BP86/def-TZVP      | job_GEO_259 | job_SP_269 | CN_2   |                         |
| Anion; anti-syn (syn facing backward) | BP86/def-TZVP      | job_GEO_471 | job_SP_475 | CN_1   | COSMO-BP-TZVPD-FINE_120 |
|                                       | BP86/def2-TZVPP    | job_GEO_522 | job_SP_524 | CN_1   | COSMO-BP-TZVPD-FINE_53  |
| anti-anti                             | BP86/def-TZVP      | job_GEO_19  | job_SP_20  | CN_1   | COSMO-BP-TZVPD-FINE_122 |
|                                       | BP86/def2-TZVPP    | job_GEO_741 | job_SP_770 | CN_1   |                         |
|                                       | BP86/def2-TZVPPD   | job_GEO_742 | job_SP_771 | CN_1   |                         |
|                                       | B3LYP/def2-TZVPPD  | job_GEO_775 | job_SP_794 | CN_1   |                         |
|                                       | B3LYP/6-311+G(d,p) | JOB_1008    |            | CN_GAU |                         |

|                                    |                    |             |            |        |                         |
|------------------------------------|--------------------|-------------|------------|--------|-------------------------|
|                                    | G4(MP2)            | JOB_1008_1  |            | CN_GAU |                         |
|                                    | CBS-APNO           | JOB_1008_3  |            | CN_GAU |                         |
| syn-syn                            | BP86/def-TZVP      | job_GEO_25  | job_SP_26  | CN_1   | COSMO-BP-TZVPD-FINE_124 |
| Neutral                            |                    |             |            |        |                         |
| T1; anti-syn (syn facing forward)  | BP86/def-TZVP      | job_GEO_472 | job_SP_476 | CN_1   | COSMO-BP-TZVPD-FINE_126 |
| T1; anti-syn (syn facing backward) | BP86/def-TZVP      | job_GEO_260 | job_SP_270 | CN_2   |                         |
|                                    | BP86/def2-TZVPP    | job_GEO_523 | job_SP_525 | CN_1   | COSMO-BP-TZVPD-FINE_55  |
| T1; syn-syn                        | BP86/def-TZVP      | job_GEO_27  | job_SP_29  | CN_1   | COSMO-BP-TZVPD-FINE_128 |
| T1; anti-anti                      | BP86/def-TZVP      | job_GEO_795 | job_SP_812 | CN_1   | COSMO-BP-TZVPD-FINE_130 |
|                                    | BP86/def2-TZVPP    | job_GEO_744 | job_SP_773 | CN_1   |                         |
|                                    | BP86/def2-TZVPPD   | job_GEO_745 | job_SP_774 | CN_1   |                         |
|                                    | B3LYP/def2-TZVPPD  | job_GEO_758 | job_SP_772 | CN_1   |                         |
|                                    | B3LYP/6-311+G(d,p) | JOB_1009    |            | CN_GAU |                         |
|                                    | G4(MP2)            | JOB_1009_1  |            | CN_GAU |                         |
|                                    | CBS-APNO           | JOB_1009_3  |            | CN_GAU |                         |
| T3; cis-anti, eclipsed(H)          | BP86/def-TZVP      | job_GEO_261 | job_SP_271 | CN_2   |                         |
| T3; cis-anti, syn(H)               | BP86/def-TZVP      | job_GEO_91  | job_SP_104 | CN_1   |                         |
| T3; trans-anti, syn(H)             | BP86/def-TZVP      | job_GEO_338 | job_SP_349 | CN_2   |                         |
| T3; trans-anti, eclipsed(H)        | BP86/def-TZVP      | job_GEO_96  | job_SP_105 | CN_1   |                         |
| T3; cis-syn, eclipsed(H)           | BP86/def-TZVP      | job_GEO_75  | job_SP_106 | CN_1   |                         |
| T3; cis-syn, syn(H)                | BP86/def-TZVP      | job_GEO_92  | job_SP_107 | CN_1   |                         |
| T3; trans-syn, syn(H)              | BP86/def-TZVP      | job_GEO_67  | job_SP_76  | CN_1   |                         |
| T3; trans-syn, eclipsed(H)         | BP86/def-TZVP      | job_GEO_93  | job_SP_108 | CN_1   |                         |
| T4; cis-anti                       | BP86/def-TZVP      | job_GEO_262 | job_SP_272 | CN_2   |                         |
| T4; trans-anti                     | BP86/def-TZVP      | job_GEO_339 | job_SP_347 | CN_2   |                         |
| T4; cis-syn                        | BP86/def-TZVP      | job_GEO_51  | job_SP_72  | CN_1   |                         |
| T4; trans-syn                      | BP86/def-TZVP      | job_GEO_47  | job_SP_59  | CN_1   |                         |
| T5; trans-anti                     | BP86/def-TZVP      | job_GEO_48  | job_SP_64  | CN_1   |                         |
| T5; cis-syn                        | BP86/def-TZVP      | job_GEO_49  | job_SP_65  | CN_1   |                         |
| T5; trans-syn                      | BP86/def-TZVP      | job_GEO_50  | job_SP_57  | CN_1   |                         |
| T5; cis-anti                       | BP86/def-TZVP      | job_GEO_905 | job_SP_906 | CN_1   |                         |
| T6; anti-anti                      | BP86/def-TZVP      | job_GEO_60  | job_SP_68  | CN_1   |                         |
| T6; syn-syn                        | BP86/def-TZVP      | job_GEO_61  | job_SP_73  | CN_1   |                         |
| T6; anti-syn                       | BP86/def-TZVP      | job_GEO_62  | job_SP_70  | CN_1   |                         |
| T6; syn-anti                       | BP86/def-TZVP      | job_GEO_63  | job_SP_74  | CN_1   |                         |
| 6                                  |                    |             |            |        |                         |
| Anion                              |                    |             |            |        |                         |
|                                    | BP86/def-TZVP      | job_GEO_273 | job_SP_290 | CN_2   |                         |

|                  |  |                    |             |            |        |                        |
|------------------|--|--------------------|-------------|------------|--------|------------------------|
| Neutral          |  | BP86/def2-TZVPP    | job_GEO_538 | job_SP_540 | CN_1   | COSMO-BP-TZVPD-FINE_38 |
|                  |  | BP86/def2-TZVPPD   | job_GEO_747 | job_SP_799 | CN_1   |                        |
|                  |  | B3LYP/def2-TZVPPD  | job_GEO_748 | job_SP_800 | CN_1   |                        |
|                  |  | B3LYP/6-311+G(d,p) | JOB_1010    |            | CN_GAU |                        |
|                  |  | G4(MP2)            | JOB_1010_1  |            | CN_GAU |                        |
|                  |  | W1RO               | JOB_1010_2  |            | CN_GAU |                        |
|                  |  | CBS-APNO           | JOB_1010_3  |            | CN_GAU |                        |
|                  |  |                    |             |            |        |                        |
| T1               |  | BP86/def-TZVP      | job_GEO_274 | job_SP_291 | CN_2   | COSMO-BP-TZVPD-FINE_40 |
| T2               |  | BP86/def-TZVP      | job_GEO_275 | job_SP_292 | CN_2   |                        |
|                  |  | BP86/def2-TZVPP    | job_GEO_539 | job_SP_542 | CN_1   |                        |
|                  |  | BP86/def2-TZVPPD   | job_GEO_749 | job_SP_801 | CN_1   |                        |
|                  |  | B3LYP/def2-TZVPPD  | job_GEO_750 | job_SP_802 | CN_1   |                        |
|                  |  | B3LYP/6-311+G(d,p) | JOB_1011    |            | CN_GAU |                        |
|                  |  | G4(MP2)            | JOB_1011_1  |            | CN_GAU |                        |
|                  |  | W1RO               | JOB_1011_2  |            | CN_GAU |                        |
|                  |  | CBS-APNO           | JOB_1011_3  |            | CN_GAU |                        |
|                  |  |                    |             |            |        |                        |
| 7                |  |                    |             |            |        |                        |
| Anion            |  |                    |             |            |        |                        |
|                  |  | BP86/def-TZVP      | job_GEO_276 | job_SP_293 | CN_2   | COSMO-BP-TZVPD-FINE_57 |
|                  |  | BP86/def2-TZVPP    | job_GEO_544 | job_SP_570 | CN_1   |                        |
|                  |  | BP86/def2-TZVPPD   | job_GEO_751 | job_SP_803 | CN_1   |                        |
|                  |  | B3LYP/def2-TZVPPD  | job_GEO_752 | job_SP_804 | CN_1   |                        |
|                  |  | B3LYP/6-311+G(d,p) | JOB_1012    |            | CN_GAU |                        |
|                  |  | G4(MP2)            | JOB_1012_1  |            | CN_GAU |                        |
|                  |  | W1RO               | JOB_1012_2  |            | CN_GAU |                        |
|                  |  | CBS-APNO           | JOB_1012_3  |            | CN_GAU |                        |
|                  |  |                    |             |            |        |                        |
| Neutral          |  |                    |             |            |        |                        |
| T3 = T1; anti(H) |  | BP86/def-TZVP      | job_GEO_277 | job_SP_296 | CN_2   | COSMO-BP-TZVPD-FINE_71 |
| T3 = T1; syn(H)  |  | BP86/def-TZVP      | job_GEO_307 | job_SP_309 | CN_2   |                        |
| T2 = T4          |  | BP86/def-TZVP      | job_GEO_278 | job_SP_295 | CN_2   |                        |
| T2 = T5          |  | BP86/def-TZVP      | job_GEO_109 | job_SP_113 | CN_1   |                        |
|                  |  | BP86/def2-TZVPP    | job_GEO_543 | job_SP_571 | CN_1   |                        |
|                  |  | BP86/def2-TZVPPD   | job_GEO_753 | job_SP_805 | CN_1   |                        |
|                  |  | B3LYP/def2-TZVPPD  | job_GEO_754 | job_SP_806 | CN_1   |                        |
|                  |  | B3LYP/6-311+G(d,p) | JOB_1013    |            | CN_GAU |                        |
|                  |  | G4(MP2)            | JOB_1013_1  |            | CN_GAU |                        |
|                  |  | W1RO               | JOB_1013_2  |            | CN_GAU |                        |

|                           |                           |                           |            |                |                         |
|---------------------------|---------------------------|---------------------------|------------|----------------|-------------------------|
| T6                        | CBS-APNO<br>BP86/def-TZVP | JOB_1013_3<br>job_GEO_110 | job_SP_112 | CN_GAU<br>CN_1 |                         |
| 8                         |                           |                           |            |                |                         |
| Anion                     |                           |                           |            |                |                         |
| syn-syn                   | BP86/def-TZVP             | job_GEO_279               | job_SP_297 | CN_2           | COSMO-BP-TZVPD-FINE_132 |
| anti-syn                  | BP86/def-TZVP             | job_GEO_308               | job_SP_316 | CN_2           | COSMO-BP-TZVPD-FINE_134 |
|                           | BP86/def2-TZVPP           | job_GEO_755               | job_SP_807 | CN_1           |                         |
|                           | BP86/def2-TZVPPD          | job_GEO_756               | job_SP_808 | CN_1           |                         |
|                           | B3LYP/def2-TZVPPD         | job_GEO_757               | job_SP_809 | CN_1           |                         |
|                           | B3LYP/6-311+G(d,p)        | JOB_1014                  |            | CN_GAU         |                         |
|                           | G4(MP2)                   | JOB_1014_1                |            | CN_GAU         |                         |
|                           | CBS-APNO                  | JOB_1014_3                |            | CN_GAU         |                         |
| anti-anti                 | BP86/def-TZVP             | job_GEO_116               | job_SP_117 | CN_1           |                         |
|                           | BP86/def2-TZVPP           | job_GEO_545               | job_SP_572 | CN_1           | COSMO-BP-TZVPD-FINE_73  |
| Neutral                   |                           |                           |            |                |                         |
| T1; syn-syn               | BP86/def-TZVP             | job_GEO_175               | job_SP_184 | CN_1           |                         |
| T1; anti-anti             | BP86/def-TZVP             | job_GEO_114               | job_SP_118 | CN_1           |                         |
| T1; anti-syn = syn-anti   | BP86/def-TZVP             | job_GEO_280               | job_SP_298 | CN_2           |                         |
| T2; anti-anti             | BP86/def-TZVP             | job_GEO_283               | job_SP_301 | CN_2           |                         |
|                           | BP86/def2-TZVPP           | job_GEO_546               | job_SP_573 | CN_1           | COSMO-BP-TZVPD-FINE_114 |
| T2; syn-anti              | BP86/def-TZVP             | job_GEO_317               | job_SP_322 | CN_2           | COSMO-BP-TZVPD-FINE_136 |
|                           | BP86/def2-TZVPP           | job_GEO_810               | job_SP_811 | CN_1           |                         |
|                           | BP86/def2-TZVPPD          | job_GEO_823               | job_SP_826 | CN_1           |                         |
|                           | B3LYP/def2-TZVPPD         | job_GEO_824               | job_SP_835 | CN_1           |                         |
|                           | B3LYP/6-311+G(d,p)        | JOB_1015                  |            | CN_GAU         |                         |
|                           | G4(MP2)                   | JOB_1015_1                |            | CN_GAU         |                         |
|                           | CBS-APNO                  | JOB_1015_3                |            | CN_GAU         |                         |
| T2; syn-syn               | BP86/def-TZVP             | job_GEO_123               | job_SP_124 | CN_1           | COSMO-BP-TZVPD-FINE_138 |
| T3; cis-anti, anti(H)     | BP86/def-TZVP             | job_GEO_315               | job_SP_321 | CN_2           |                         |
| T3; cis-anti, syn(H)      | BP86/def-TZVP             | job_GEO_152               | job_SP_153 | CN_1           |                         |
| T3; cis-anti, eclipsed(H) | BP86/def-TZVP             | job_GEO_170               | job_SP_171 | CN_1           |                         |
| T3; trans-anti, syn(H)    | BP86/def-TZVP             | job_GEO_154               | job_SP_155 | CN_1           |                         |
| T3; trans-anti, anti(H)   | BP86/def-TZVP             | job_GEO_162               | job_SP_174 | CN_1           |                         |
| T3; cis-syn, eclipsed(H)  | BP86/def-TZVP             | job_GEO_157               | job_SP_167 | CN_1           |                         |
| T3; trans-syn, syn(H)     | BP86/def-TZVP             | job_GEO_159               | job_SP_168 | CN_1           |                         |
| T3; trans-syn, anti(H)    | BP86/def-TZVP             | job_GEO_161               | job_SP_173 | CN_1           |                         |
| T4; cis-anti              | BP86/def-TZVP             | job_GEO_122               | job_SP_125 | CN_1           |                         |
| T4; cis-syn               | BP86/def-TZVP             | job_GEO_121               | job_SP_126 | CN_1           |                         |



|                                                    |                    |             |            |        |                         |
|----------------------------------------------------|--------------------|-------------|------------|--------|-------------------------|
| T4; trans-syn                                      | BP86/def-TZVP      | job_GEO_127 | job_SP_128 | CN_1   |                         |
| T4; trans-anti                                     | BP86/def-TZVP      | job_GEO_289 | job_SP_300 | CN_2   |                         |
| T5; trans-anti                                     | BP86/def-TZVP      | job_GEO_129 | job_SP_133 | CN_1   |                         |
| T5; cis-syn                                        | BP86/def-TZVP      | job_GEO_130 | job_SP_134 | CN_1   |                         |
| T5; cis-anti                                       | BP86/def-TZVP      | job_GEO_131 | job_SP_135 | CN_1   |                         |
| T5; trans-syn                                      | BP86/def-TZVP      | job_GEO_132 | job_SP_136 | CN_1   |                         |
| T6; anti-anti                                      | BP86/def-TZVP      | job_GEO_137 | job_SP_142 | CN_1   |                         |
| T6; anti-syn                                       | BP86/def-TZVP      | job_GEO_150 | job_SP_151 | CN_1   |                         |
| T6; syn-anti                                       | BP86/def-TZVP      | job_GEO_141 | job_SP_147 | CN_1   |                         |
| T6; syn-syn                                        | BP86/def-TZVP      | job_GEO_140 | job_SP_149 | CN_1   |                         |
| <b>9</b>                                           |                    |             |            |        |                         |
| Anion                                              |                    |             |            |        |                         |
| symmetrical                                        | BP86/def-TZVP      | job_GEO_285 | job_SP_302 | CN_2   |                         |
|                                                    | BP86/def2-TZVPP    | job_GEO_549 | job_SP_574 | CN_1   | COSMO-BP-TZVPD-FINE_63  |
|                                                    | BP86/def2-TZVPPD   | job_GEO_837 | job_SP_841 | CN_1   |                         |
|                                                    | B3LYP/def2-TZVPPD  | job_GEO_838 | job_SP_845 | CN_1   |                         |
|                                                    | B3LYP/6-311+G(d,p) | JOB_1016    |            | CN_GAU |                         |
| asymmetrical                                       | G4(MP2)            | JOB_1016_1  |            | CN_GAU |                         |
|                                                    | BP86/def-TZVP      | job_GEO_327 | job_SP_331 | CN_2   |                         |
|                                                    | BP86/def2-TZVPP    | job_GEO_550 | job_SP_575 | CN_1   | COSMO-BP-TZVPD-FINE_65  |
| Neutral                                            |                    |             |            |        |                         |
| T1; asymmetrical, anti-syn-syn; H facing backward  | BP86/def-TZVP      | job_GEO_286 | job_SP_303 | CN_2   | COSMO-BP-TZVPD-FINE_306 |
| T1; symmetrical, syn-syn-syn; H facing backward    | BP86/def-TZVP      | job_GEO_324 | job_SP_328 | CN_2   | COSMO-BP-TZVPD-FINE_308 |
| T1; symmetrical, anti-anti-anti; H facing backward | BP86/def-TZVP      | job_GEO_178 | job_SP_182 | CN_1   |                         |
|                                                    | BP86/def2-TZVPP    | job_GEO_547 | job_SP_576 | CN_1   |                         |
|                                                    | BP86/def2-TZVPPD   | job_GEO_869 | job_SP_871 | CN_1   |                         |
|                                                    | B3LYP/def2-TZVPPD  | job_GEO_840 | job_SP_846 | CN_1   |                         |
|                                                    | B3LYP/6-311+G(d,p) | JOB_1017    |            | CN_GAU |                         |
| T1; asymmetrical, anti-anti-syn; H facing backward | G4(MP2)            | JOB_1017_1  |            | CN_GAU |                         |
|                                                    | BP86/def-TZVP      | job_GEO_177 | job_SP_181 | CN_1   | COSMO-BP-TZVPD-FINE_310 |
|                                                    | BP86/def-TZVP      | job_GEO_287 | job_SP_306 | CN_2   |                         |
|                                                    | BP86/def-TZVP      | job_GEO_325 | job_SP_329 | CN_2   |                         |
|                                                    | BP86/def-TZVP      | job_GEO_209 | job_SP_210 | CN_1   |                         |
|                                                    | BP86/def-TZVP      | job_GEO_211 | job_SP_233 | CN_1   |                         |
|                                                    | BP86/def-TZVP      | job_GEO_212 | job_SP_223 | CN_1   |                         |
|                                                    | BP86/def-TZVP      | job_GEO_213 | job_SP_225 | CN_1   |                         |
|                                                    | BP86/def-TZVP      | job_GEO_220 | job_SP_226 | CN_1   |                         |
|                                                    | BP86/def-TZVP      | job_GEO_221 | job_SP_234 | CN_1   |                         |
|                                                    |                    |             |            |        |                         |
|                                                    |                    |             |            |        |                         |
| T3; trans-syn-syn, eclipsed(H)                     |                    |             |            |        |                         |
| T3; trans-syn-syn, anti(H)                         |                    |             |            |        |                         |
| T3; trans-syn-syn, syn(H)                          |                    |             |            |        |                         |
| T3; trans-syn-anti, syn(H)                         |                    |             |            |        |                         |
| T3; trans-syn-anti, anti(H)                        |                    |             |            |        |                         |
| T3; trans-syn-anti, eclipsed(H)                    |                    |             |            |        |                         |
| T3; trans-anti-anti, syn(H)                        |                    |             |            |        |                         |
| T3; trans-anti-anti, anti(H)                       |                    |             |            |        |                         |

|                                           |                    |             |            |        |                         |
|-------------------------------------------|--------------------|-------------|------------|--------|-------------------------|
| T3; trans-anti-anti, syn(H) (symmetrical) | BP86/def-TZVP      | job_GEO_216 | job_SP_228 | CN_1   |                         |
| T3; trans-syn-anti, syn(H)                | BP86/def-TZVP      | job_GEO_217 | job_SP_229 | CN_1   |                         |
| T3; trans-syn-anti, anti(H)               | BP86/def-TZVP      | job_GEO_218 | job_SP_235 | CN_1   |                         |
| T3; trans-syn-anti, eclipsed(H)           | BP86/def-TZVP      | job_GEO_231 | job_SP_232 | CN_1   |                         |
| T4; trans-anti-syn                        | BP86/def-TZVP      | job_GEO_288 | job_SP_304 | CN_2   | COSMO-BP-TZVPD-FINE_140 |
| T4; trans-syn-anti                        | BP86/def-TZVP      | job_GEO_179 | job_SP_187 | CN_1   |                         |
| T4; trans-syn-anti                        | BP86/def2-TZVPP    | job_GEO_548 | job_SP_577 | CN_1   | COSMO-BP-TZVPD-FINE_69  |
| T4; trans-syn-syn                         | BP86/def-TZVP      | job_GEO_185 | job_SP_189 | CN_1   | COSMO-BP-TZVPD-FINE_142 |
| T4; trans-anti-anti (symmetrical)         | BP86/def-TZVP      | job_GEO_183 | job_SP_186 | CN_1   | COSMO-BP-TZVPD-FINE_144 |
| T5; trans-anti-syn                        | BP86/def-TZVP      | job_GEO_193 | job_SP_198 | CN_1   |                         |
| T5; trans-syn-anti                        | BP86/def-TZVP      | job_GEO_190 | job_SP_199 | CN_1   |                         |
| T5; trans-syn-syn                         | BP86/def-TZVP      | job_GEO_192 | job_SP_200 | CN_1   |                         |
| T5; trans-anti-anti (symmetrical)         | BP86/def-TZVP      | job_GEO_191 | job_SP_207 | CN_1   |                         |
| T6; anti-anti-syn                         | BP86/def-TZVP      | job_GEO_197 | job_SP_202 | CN_1   |                         |
| T6; anti-syn-anti                         | BP86/def-TZVP      | job_GEO_194 | job_SP_203 | CN_1   |                         |
| T6; anti-syn-syn                          | BP86/def-TZVP      | job_GEO_196 | job_SP_206 | CN_1   |                         |
| T6; anti-anti-anti (symmetrical)          | BP86/def-TZVP      | job_GEO_195 | job_SP_208 | CN_1   |                         |
| <b>10</b>                                 |                    |             |            |        |                         |
| Anion                                     |                    |             |            |        |                         |
| Pyramidal                                 | BP86/def-TZVP      | job_GEO_365 | job_SP_366 | CN_2   |                         |
|                                           | BP86/def2-TZVPP    | job_GEO_551 | job_SP_578 | CN_1   | COSMO-BP-TZVPD-FINE_75  |
|                                           | BP86/def2-TZVPPD   | job_GEO_847 | job_SP_872 | CN_1   |                         |
|                                           | B3LYP/def2-TZVPPD  | job_GEO_848 | job_SP_873 | CN_1   |                         |
|                                           | B3LYP/6-311+G(d,p) | JOB_1018    |            | CN_GAU |                         |
|                                           | G4(MP2)            | JOB_1018_1  |            | CN_GAU |                         |
|                                           | W1RO               | JOB_1018_2  |            | CN_GAU |                         |
| Neutral                                   | CBS-APNO           | JOB_1018_3  |            | CN_GAU |                         |
|                                           |                    |             |            |        |                         |
|                                           |                    |             |            |        |                         |
|                                           |                    |             |            |        |                         |
|                                           |                    |             |            |        |                         |
|                                           |                    |             |            |        |                         |
|                                           |                    |             |            |        |                         |
|                                           |                    |             |            |        |                         |
|                                           |                    |             |            |        |                         |
|                                           |                    |             |            |        |                         |
| T2                                        | BP86/def-TZVP      | job_GEO_352 | job_SP_355 | CN_2   |                         |
|                                           | BP86/def2-TZVPP    | job_GEO_552 | job_SP_579 | CN_1   | COSMO-BP-TZVPD-FINE_77  |
|                                           | BP86/def2-TZVPPD   | job_GEO_849 | job_SP_874 | CN_1   |                         |
|                                           | B3LYP/def2-TZVPPD  | job_GEO_850 | job_SP_875 | CN_1   |                         |
|                                           | B3LYP/6-311+G(d,p) | JOB_1019    |            | CN_GAU |                         |
|                                           | G4(MP2)            | JOB_1019_1  |            | CN_GAU |                         |
|                                           | W1RO               | JOB_1019_2  |            | CN_GAU |                         |
|                                           | CBS-APNO           | JOB_1019_3  |            | CN_GAU |                         |

|       |                                  |                    |             |            |        |                         |
|-------|----------------------------------|--------------------|-------------|------------|--------|-------------------------|
| Anion |                                  | BP86/def-TZVP      | job_GEO_356 | jos_SP_390 | CN_2   |                         |
|       |                                  | BP86/def2-TZVPP    | job_GEO_553 | job_SP_598 | CN_1   | COSMO-BP-TZVPD-FINE_79  |
|       |                                  | BP86/def2-TZVPPD   | job_GEO_851 | job_SP_878 | CN_1   |                         |
|       |                                  | B3LYP/def2-TZVPPD  | job_GEO_852 | job_SP_879 | CN_1   |                         |
|       |                                  | B3LYP/6-311+G(d,p) | JOB_1020    |            | CN_GAU |                         |
|       |                                  | G4(MP2)            | JOB_1020_1  |            | CN_GAU |                         |
|       |                                  | W1RO               | JOB_1020_2  |            | CN_GAU |                         |
|       |                                  | CBS-APNO           | JOB_1020_3  |            | CN_GAU |                         |
|       | T2; protonated on CN-1           | BP86/def-TZVP      | job_GEO_360 | job_SP_392 | CN_2   |                         |
|       | T2; protonated on CN-2           | BP86/def-TZVP      | job_GEO_238 | job_SP_242 | CN_1   |                         |
|       | T2; protonated on CN-3           | BP86/def-TZVP      | job_GEO_239 | job_SP_243 | CN_1   |                         |
|       |                                  | BP86/def2-TZVPP    | job_GEO_554 | job_SP_599 | CN_1   | COSMO-BP-TZVPD-FINE_81  |
|       |                                  | BP86/def2-TZVPPD   | job_GEO_853 | job_SP_880 | CN_1   |                         |
|       |                                  | B3LYP/def2-TZVPPD  | job_GEO_854 | job_SP_881 | CN_1   |                         |
|       |                                  | B3LYP/6-311+G(d,p) | JOB_1021    |            | CN_GAU |                         |
| 12    |                                  | G4(MP2)            | JOB_1021_1  |            | CN_GAU |                         |
|       |                                  | W1RO               | JOB_1021_2  |            | CN_GAU |                         |
|       |                                  | CBS-APNO           | JOB_1021_3  |            | CN_GAU |                         |
|       | T4                               | BP86/def-TZVP      | job_GEO_244 | job_SP_245 | CN_1   |                         |
|       | T5                               | BP86/def-TZVP      | job_GEO_389 | job_SP_391 | CN_1   |                         |
|       | T6                               | BP86/def-TZVP      | job_GEO_237 | job_SP_241 | CN_1   |                         |
|       |                                  |                    |             |            |        |                         |
|       |                                  |                    |             |            |        |                         |
|       |                                  |                    |             |            |        |                         |
|       |                                  |                    |             |            |        |                         |
| Anion | anti-syn; asymmetric             | BP86/def-TZVP      | job_GEO_454 | job_SP_457 | CN_2   |                         |
|       |                                  | BP86/def2-TZVPP    | job_GEO_555 | job_SP_600 | CN_1   | COSMO-BP-TZVPD-FINE_83  |
|       |                                  | BP86/def2-TZVPPD   | job_GEO_855 | job_SP_882 | CN_1   |                         |
|       |                                  | B3LYP/def2-TZVPPD  | job_GEO_856 | job_SP_883 | CN_1   |                         |
|       |                                  | B3LYP/6-311+G(d,p) | JOB_1022    |            | CN_GAU |                         |
|       |                                  | G4(MP2)            | JOB_1022_1  |            | CN_GAU |                         |
|       |                                  | CBS-APNO           | JOB_1022_3  |            | CN_GAU |                         |
|       | syn-syn; symmetric               | BP86/def-TZVP      | job_GEO_455 | job_SP_458 | CN_2   | COSMO-BP-TZVPD-FINE_147 |
|       | anti-anti; symmetric             | BP86/def-TZVP      | job_GEO_456 | job_SP_459 | CN_2   | COSMO-BP-TZVPD-FINE_149 |
|       |                                  |                    |             |            |        |                         |
|       | Neutral                          |                    |             |            |        |                         |
|       | T2; protonated on CN-1; anti-syn | BP86/def-TZVP      | job_GEO_114 | job_SP_115 | CN_3   |                         |
|       |                                  | BP86/def2-TZVPP    | job_GEO_556 | job_SP_601 | CN_1   | COSMO-BP-TZVPD-FINE_85  |
|       |                                  | BP86/def2-TZVPPD   | job_GEO_857 | job_SP_884 | CN_1   |                         |
|       |                                  | B3LYP/def2-TZVPPD  | job_GEO_858 | job_SP_885 | CN_1   |                         |

|                                         |                    |             |            |        |                         |
|-----------------------------------------|--------------------|-------------|------------|--------|-------------------------|
|                                         | B3LYP/6-311+G(d,p) | JOB_1023    |            | CN_GAU |                         |
|                                         | G4(MP2)            | JOB_1023_1  |            | CN_GAU |                         |
|                                         | CBS-APNO           | JOB_1023_3  |            | CN_GAU |                         |
| T2; protonated on CN-1; syn-syn         | BP86/def-TZVP      | job_GEO_253 | job_SP_304 | CN_1   | COSMO-BP-TZVPD-FINE_151 |
| T2; protonated on CN-1; rather anti-syn | BP86/def-TZVP      | job_GEO_252 | job_SP_305 | CN_1   | COSMO-BP-TZVPD-FINE_167 |
| T2; protonated on CN-2; syn-syn         | BP86/def-TZVP      | job_GEO_255 | job_SP_306 | CN_1   |                         |
| T2; protonated on CN-2; anti-syn        | BP86/def-TZVP      | job_GEO_250 | job_SP_307 | CN_1   |                         |
| T2; protonated on CN-2; syn-anti        | BP86/def-TZVP      | job_GEO_251 | job_SP_308 | CN_1   |                         |
| T2; protonated on CN-2; anti-anti       | BP86/def-TZVP      | job_GEO_254 | job_SP_309 | CN_1   | COSMO-BP-TZVPD-FINE_169 |
| T4; cis-anti                            | BP86/def-TZVP      | job_GEO_113 | job_SP_116 | CN_3   |                         |
| T4; cis-syn                             | BP86/def-TZVP      | job_GEO_258 | job_SP_267 | CN_1   |                         |
| T4; trans-anti                          | BP86/def-TZVP      | job_GEO_256 | job_SP_295 | CN_1   |                         |
| T4; trans-syn                           | BP86/def-TZVP      | job_GEO_257 | job_SP_296 | CN_1   |                         |
| T5; cis-anti                            | BP86/def-TZVP      | job_GEO_261 | job_SP_297 | CN_1   |                         |
| T5; cis-anti                            | BP86/def-TZVP      | job_GEO_262 | job_SP_283 | CN_1   |                         |
| T5; cis-syn                             | BP86/def-TZVP      | job_GEO_286 | job_SP_298 | CN_1   |                         |
| T5; trans-syn                           | BP86/def-TZVP      | job_GEO_259 | job_SP_299 | CN_1   |                         |
| T5; trans-anti                          | BP86/def-TZVP      | job_GEO_260 | job_SP_300 | CN_1   |                         |
| T6; anti-syn                            | BP86/def-TZVP      | job_GEO_264 | job_SP_301 | CN_1   |                         |
| T6; syn-syn                             | BP86/def-TZVP      | job_GEO_266 | job_SP_302 | CN_1   |                         |
| T6; anti-anti                           | BP86/def-TZVP      | job_GEO_268 | job_SP_281 | CN_1   |                         |
| T6; syn-anti                            | BP86/def-TZVP      | job_GEO_265 | job_SP_281 | CN_1   |                         |
| <b>13</b>                               |                    |             |            |        |                         |
| Anion                                   |                    |             |            |        |                         |
| anti-syn-anti                           | BP86/def-TZVP      | job_GEO_129 | job_SP_136 | CN_3   | COSMO-BP-TZVPD-FINE_155 |
| anti-syn-syn                            | BP86/def-TZVP      | job_GEO_131 | job_SP_138 | CN_3   | COSMO-BP-TZVPD-FINE_157 |
| syn-syn-syn                             | BP86/def-TZVP      | job_GEO_248 | job_SP_249 | CN_1   | COSMO-BP-TZVPD-FINE_153 |
| anti-anti-anti                          | BP86/def-TZVP      | job_GEO_137 | job_SP_139 | CN_3   |                         |
|                                         | BP86/def2-TZVPP    | job_GEO_557 | job_SP_604 | CN_1   | COSMO-BP-TZVPD-FINE_87  |
|                                         | BP86/def2-TZVPPD   | job_GEO_859 | job_SP_886 | CN_1   |                         |
|                                         | B3LYP/def2-TZVPPD  | job_GEO_860 | job_SP_887 | CN_1   |                         |
|                                         | B3LYP/6-311+G(d,p) | JOB_1024    |            | CN_GAU |                         |
|                                         | G4(MP2)            | JOB_1024_1  |            | CN_GAU |                         |
| Neutral                                 |                    |             |            |        |                         |
| T2, anti-anti-syn                       | BP86/def-TZVP      | job_GEO_127 | job_SP_134 | CN_3   | COSMO-BP-TZVPD-FINE_159 |
| T2, anti-anti-anti                      | BP86/def-TZVP      | job_GEO_100 | job_SP_106 | CN_3   | COSMO-BP-TZVPD-FINE_161 |
|                                         | BP86/def2-TZVPP    | job_GEO_558 | job_SP_603 | CN_1   | COSMO-BP-TZVPD-FINE_89  |
|                                         | BP86/def2-TZVPPD   | job_GEO_861 | job_SP_888 | CN_1   |                         |

|                                           |                    |             |            |        |                         |
|-------------------------------------------|--------------------|-------------|------------|--------|-------------------------|
|                                           | B3LYP/def2-TZVPPD  | job_GEO_862 | job_SP_889 | CN_1   |                         |
|                                           | B3LYP/6-311+G(d,p) | JOB_1025    |            |        |                         |
|                                           | G4(MP2)            | JOB_1025_1  |            |        |                         |
| T2, anti-syn-syn                          | BP86/def-TZVP      | job_GEO_313 | job_SP_314 | CN_1   | COSMO-BP-TZVPD-FINE_163 |
| T2, syn-syn-syn                           | BP86/def-TZVP      | job_GEO_312 | job_SP_315 | CN_1   | COSMO-BP-TZVPD-FINE_165 |
| T4, trans-syn-anti                        | BP86/def-TZVP      | job_GEO_128 | job_SP_135 | CN_3   |                         |
| T4; cis-syn-anti                          | BP86/def-TZVP      | job_GEO_317 | job_SP_366 | CN_1   |                         |
| T4; trans-syn-syn                         | BP86/def-TZVP      | job_GEO_318 | job_SP_367 | CN_1   |                         |
| T4; cis-syn-syn (symmetrical)             | BP86/def-TZVP      | job_GEO_319 | job_SP_373 | CN_1   |                         |
| T4; trans-anti-anti (symmetrical)         | BP86/def-TZVP      | job_GEO_320 | job_SP_374 | CN_1   |                         |
| T4; cis-anti-anti                         | BP86/def-TZVP      | job_GEO_321 | job_SP_375 | CN_1   |                         |
| T4; trans-anti-syn                        | BP86/def-TZVP      | job_GEO_322 | job_SP_371 | CN_1   |                         |
| T4; cis-anti-syn                          | BP86/def-TZVP      | job_GEO_323 | job_SP_372 | CN_1   |                         |
| T5; trans-(anti)-anti                     | BP86/def-TZVP      | job_GEO_340 | job_SP_377 | CN_1   |                         |
| T5; cis-syn-anti                          | BP86/def-TZVP      | job_GEO_333 | job_SP_378 | CN_1   |                         |
| T5; trans-(anti)-syn                      | BP86/def-TZVP      | job_GEO_334 | job_SP_383 | CN_1   |                         |
| T5; cis-syn-(syn)                         | BP86/def-TZVP      | job_GEO_343 | job_SP_380 | CN_1   |                         |
| T5; trans-anti-anti                       | BP86/def-TZVP      | job_GEO_336 | job_SP_381 | CN_1   |                         |
| T5; cis-anti-anti                         | BP86/def-TZVP      | job_GEO_337 | job_SP_382 | CN_1   |                         |
| T5; trans-anti-syn                        | BP86/def-TZVP      | job_GEO_338 | job_SP_392 | CN_1   |                         |
| T5; cis-anti-(anti)                       | BP86/def-TZVP      | job_GEO_347 | job_SP_385 | CN_1   |                         |
| T6; trans-syn-anti                        | BP86/def-TZVP      | job_GEO_348 | job_SP_402 | CN_1   |                         |
| T6; cis-(anti)-anti                       | BP86/def-TZVP      | job_GEO_341 | job_SP_394 | CN_1   |                         |
| T6; trans-syn-(syn)                       | BP86/def-TZVP      | job_GEO_342 | job_SP_403 | CN_1   |                         |
| T6; cis-syn-syn (symmetrical)             | BP86/def-TZVP      | job_GEO_335 | job_SP_401 | CN_1   |                         |
| T6; trans-anti-anti (symmetrical)         | BP86/def-TZVP      | job_GEO_344 | job_SP_404 | CN_1   |                         |
| T6; cis-anti-anti                         | BP86/def-TZVP      | job_GEO_345 | job_SP_398 | CN_1   |                         |
| T6; trans-anti-(anti)                     | BP86/def-TZVP      | job_GEO_346 | job_SP_405 | CN_1   |                         |
| T6; cis-ani-syn                           | BP86/def-TZVP      | job_GEO_339 | job_SP_400 | CN_1   |                         |
| <b>14</b>                                 |                    |             |            |        |                         |
| Anion                                     |                    |             |            |        |                         |
| conformer I                               | BP86/def-TZVP      | job_GEO_86  | job_SP_88  | CN_3   | COSMO-BP-TZVPD-FINE_175 |
| conformer II                              | BP86/def-TZVP      | job_GEO_406 | job_SP_421 | CN_1   |                         |
|                                           | BP86/def2-TZVPP    | job_GEO_559 | job_SP_595 | CN_1   | COSMO-BP-TZVPD-FINE_91  |
| conformer III; most stable from CosmoConf | BP86/def-TZVP      | job_GEO_675 | job_SP_676 | CN_1   | COSMO-BP-TZVPD-FINE_171 |
|                                           | BP86/def2-TZVPP    | job_GEO_863 | job_SP_890 | CN_1   |                         |
|                                           | BP86/def2-TZVPPD   | job_GEO_864 | job_SP_891 | CN_1   |                         |
|                                           | B3LYP/6-311+G(d,p) | JOB_1026    |            | CN_GAU |                         |

|                   | G4(MP2)       | JOB_1026 _1           |            | CN_GAU |                         |
|-------------------|---------------|-----------------------|------------|--------|-------------------------|
| conformer IV      | BP86/def-TZVP | job_GEO_677           | job_SP_680 | CN_1   | COSMO-BP-TZVPD-FINE_173 |
| Neutral           |               |                       |            |        |                         |
| T4; conformer I   | BP86/def-TZVP | job_GEO_109           | job_SP_117 | CN_3   |                         |
| T4; conformer I   | BP86/def-TZVP | job_GEO_437           | job_SP_449 | CN_1   |                         |
| T4; conformer I   | BP86/def-TZVP | job_GEO_440           | job_SP_450 | CN_1   |                         |
| T4; conformer I   | BP86/def-TZVP | job_GEO_443           | job_SP_451 | CN_1   |                         |
| T4; conformer I   | BP86/def-TZVP | job_GEO_446           | job_SP_452 | CN_1   |                         |
| T4; conformer II  | BP86/def-TZVP | job_GEO_410           | job_SP_424 | CN_1   |                         |
| T4; conformer II  | BP86/def-TZVP | job_GEO_422           | job_SP_433 | CN_1   |                         |
| T4; conformer II  | BP86/def-TZVP | job_GEO_416           | job_SP_429 | CN_1   |                         |
| T4; conformer II  | BP86/def-TZVP | job_GEO_419           | job_SP_434 | CN_1   |                         |
| T4; conformer III | BP86/def-TZVP | CN_684 (14_AN_1_T4_1) | job_SP_685 | CN_1   |                         |
| T4; conformer III | BP86/def-TZVP | CN_684 (14_AN_1_T4_2) | job_SP_686 | CN_1   |                         |
| T4; conformer III | BP86/def-TZVP | CN_684 (14_AN_1_T4_3) | job_SP_687 | CN_1   |                         |
| T4; conformer III | BP86/def-TZVP | CN_684 (14_AN_1_T4_4) | job_SP_688 | CN_1   |                         |
| T4; conformer IV  | BP86/def-TZVP | CN_697 (14_AN_2_T4_1) | job_SP_698 | CN_1   |                         |
| T4; conformer IV  | BP86/def-TZVP | CN_697 (14_AN_2_T4_2) | job_SP_699 | CN_1   |                         |
| T4; conformer IV  | BP86/def-TZVP | CN_697 (14_AN_2_T4_3) | job_SP_700 | CN_1   |                         |
| T4; conformer IV  | BP86/def-TZVP | CN_697 (14_AN_2_T4_4) | job_SP_701 | CN_1   |                         |
| T5; conformer I   | BP86/def-TZVP | job_GEO_448           | job_SP_453 | CN_1   |                         |
| T5; conformer I   | BP86/def-TZVP | job_GEO_465           | job_SP_466 | CN_1   |                         |
| T5; conformer I   | BP86/def-TZVP | job_GEO_442           | job_SP_461 | CN_1   |                         |
| T5; conformer I   | BP86/def-TZVP | job_GEO_447           | job_SP_456 | CN_1   |                         |
| T5; conformer II  | BP86/def-TZVP | job_GEO_409           | job_SP_423 | CN_1   |                         |
| T5; conformer II  | BP86/def-TZVP | job_GEO_414           | job_SP_427 | CN_1   |                         |
| T5; conformer II  | BP86/def-TZVP | job_GEO_415           | job_SP_430 | CN_1   |                         |
| T5; conformer II  | BP86/def-TZVP | job_GEO_418           | job_SP_432 | CN_1   |                         |
| T5; conformer III | BP86/def-TZVP | CN_684 (14_AN_1_T5_1) | job_SP_689 | CN_1   |                         |
| T5; conformer III | BP86/def-TZVP | CN_684 (14_AN_1_T5_2) | job_SP_690 | CN_1   |                         |
| T5; conformer III | BP86/def-TZVP | CN_684 (14_AN_1_T5_3) | job_SP_691 | CN_1   |                         |
| T5; conformer III | BP86/def-TZVP | CN_684 (14_AN_1_T5_4) | job_SP_692 | CN_1   |                         |
| T5; conformer IV  | BP86/def-TZVP | CN_697 (14_AN_2_T5_1) | job_SP_702 | CN_1   |                         |
| T5; conformer IV  | BP86/def-TZVP | CN_697 (14_AN_2_T5_2) | job_SP_703 | CN_1   |                         |
| T5; conformer IV  | BP86/def-TZVP | CN_697 (14_AN_2_T5_3) | job_SP_704 | CN_1   |                         |
| T5; conformer IV  | BP86/def-TZVP | CN_697 (14_AN_2_T5_4) | job_SP_705 | CN_1   |                         |
| T6; conformer I   | BP86/def-TZVP | job_GEO_438           | job_SP_457 | CN_1   |                         |
| T6; conformer I   | BP86/def-TZVP | job_GEO_441           | job_SP_462 | CN_1   |                         |
| T6; conformer I   | BP86/def-TZVP | job_GEO_444           | job_SP_463 | CN_1   | COSMO-BP-TZVPD-FINE_178 |

|                   |                    |                       |            |        |                         |
|-------------------|--------------------|-----------------------|------------|--------|-------------------------|
| T6; conformer I   | BP86/def-TZVP      | job_GEO_445           | job_SP_464 | CN_1   |                         |
| T6; conformer II  | BP86/def-TZVP      | job_GEO_411           | job_SP_425 | CN_1   |                         |
| T6; conformer II  | BP86/def-TZVP      | job_GEO_412           | job_SP_426 | CN_1   |                         |
| T6; conformer II  | BP86/def2-TZVPP    | job_GEO_560           | job_SP_602 | CN_1   | COSMO-BP-TZVPD-FINE_93  |
| T6; conformer II  | BP86/def-TZVP      | job_GEO_417           | job_SP_431 | CN_1   |                         |
| T6; conformer II  | BP86/def-TZVP      | job_GEO_420           | job_SP_435 | CN_1   |                         |
| T6; conformer III | BP86/def-TZVP      | CN_684 (14_AN_1_T6_1) | job_SP_693 | CN_1   | COSMO-BP-TZVPD-FINE_180 |
| T6; conformer III | BP86/def-TZVP      | CN_684 (14_AN_1_T6_2) | job_SP_694 | CN_1   |                         |
| T6; conformer III | BP86/def-TZVP      | CN_684 (14_AN_1_T6_3) | job_SP_695 | CN_1   |                         |
| T6; conformer III | BP86/def2-TZVPP    | job_GEO_866           | job_SP_892 | CN_1   |                         |
| T6; conformer III | BP86/def2-TZVPPD   | job_GEO_867           | job_SP_893 | CN_1   |                         |
| T6; conformer III | B3LYP/6-311+G(d,p) | JOB_1027              |            | CN_GAU |                         |
| T6; conformer III | G4(MP2)            | JOB_1027_1            |            | CN_GAU |                         |
| T6; conformer III | BP86/def-TZVP      | CN_684 (14_AN_1_T6_4) | job_SP_696 | CN_1   |                         |
| T6; conformer IV  | BP86/def-TZVP      | CN_697 (14_AN_2_T6_1) | job_SP_706 | CN_1   |                         |
| T6; conformer IV  | BP86/def-TZVP      | CN_697 (14_AN_2_T6_2) | job_SP_707 | CN_1   |                         |
| T6; conformer IV  | BP86/def-TZVP      | CN_697 (14_AN_2_T6_3) | job_SP_708 | CN_1   | COSMO-BP-TZVPD-FINE_182 |
| T6; conformer IV  | BP86/def-TZVP      | CN_697 (14_AN_2_T6_4) | job_SP_709 | CN_1   |                         |
| <b>15</b>         |                    |                       |            |        |                         |
| Anion             |                    |                       |            |        |                         |
|                   | BP86/def-TZVP      | job_GEO_539           | job_SP_545 | CN_3   |                         |
|                   | B3LYP/def2-TZVPPD  | job_GEO_561           | job_SP_605 | CN_1   | COSMO-BP-TZVPD-FINE_95  |
|                   | B3LYP/6-311+G(d,p) | JOB_1029              |            | CN_GAU |                         |
| Neutral           |                    |                       |            |        |                         |
| C-N-H             | BP86/def-TZVP      | job_GEO_540           | job_SP_546 | CN_3   |                         |
| H-C-N             | BP86/def-TZVP      | job_GEO_541           | job_SP_547 | CN_3   |                         |
|                   | B3LYP/def2-TZVPPD  | job_GEO_562           | job_SP_606 | CN_1   | COSMO-BP-TZVPD-FINE_97  |
|                   | B3LYP/6-311+G(d,p) | JOB_1030              |            | CN_GAU |                         |
| <b>16</b>         |                    |                       |            |        |                         |
| Anion             |                    |                       |            |        |                         |
|                   | BP86/def-TZVP      | job_GEO_542           | job_SP_548 | CN_3   |                         |
|                   | B3LYP/def2-TZVPPD  | job_GEO_563           | job_SP_607 | CN_1   | COSMO-BP-TZVPD-FINE_99  |
|                   | B3LYP/6-311+G(d,p) | JOB_1031              |            | CN_GAU |                         |
| Neutral           |                    |                       |            |        |                         |
| T1; C(CN)2=CH(CN) | BP86/def-TZVP      | job_GEO_552           | job_SP_553 | CN_3   |                         |
|                   | B3LYP/def2-TZVPPD  | job_GEO_564           | job_SP_608 | CN_1   | COSMO-BP-TZVPD-FINE_101 |
|                   | B3LYP/6-311+G(d,p) | JOB_1032              |            | CN_GAU |                         |

|                                             |                    |             |            |        |                         |
|---------------------------------------------|--------------------|-------------|------------|--------|-------------------------|
| T4; C(CN-H)2=C(CN)                          | BP86/def-TZVP      | job_GEO_544 | job_SP_550 | CN_3   |                         |
| T6; C(CN)2=C(CN-H)                          | BP86/def-TZVP      | job_GEO_477 | job_SP_483 | CN_1   |                         |
| T5; C(CN-H)2=C(CN)                          | BP86/def-TZVP      | job_GEO_478 | job_SP_484 | CN_1   |                         |
| <b>17</b>                                   |                    |             |            |        |                         |
| Dianion                                     |                    |             |            |        |                         |
| [B12(CN)12]2-                               | BP86/def-TZVP      | job_GEO_364 | job_SP_369 | CN_3   |                         |
|                                             | BP86/def-TZVP      | job_GEO_486 | job_SP_487 | CN_1   |                         |
|                                             | B3LYP/def2-TZVPPD  | job_GEO_565 | job_SP_594 | CN_1   | COSMO-BP-TZVPD-FINE_103 |
|                                             | B3LYP/6-311+G(d,p) | JOB_1033    |            | CN_GAU |                         |
| Anion                                       |                    |             |            |        |                         |
| [B12(CN)12]-, protonated on CN              | BP86/def-TZVP      | job_GEO_365 | job_SP_370 | CN_3   |                         |
|                                             | B3LYP/def2-TZVPPD  | job_GEO_566 | job_SP_597 | CN_1   | COSMO-BP-TZVPD-FINE_105 |
|                                             | B3LYP/6-311+G(d,p) | JOB_1034    |            | CN_GAU |                         |
| <b>18</b>                                   |                    |             |            |        |                         |
| Neutral                                     |                    |             |            |        |                         |
| B12(CN)12H2, H-s dide by side               | BP86/def-TZVP      | job_GEO_373 | job_SP_379 | CN_3   |                         |
| B12(CN)12H2, 1 B between two H-s            | BP86/def-TZVP      | job_GEO_376 | job_SP_380 | CN_3   |                         |
|                                             | BP86/def-TZVP      | job_GEO_488 | job_SP_537 | CN_1   |                         |
| B12(CN)12H2, 2 B-s between two H-s          | BP86/def-TZVP      | job_GEO_372 | job_SP_381 | CN_3   |                         |
|                                             | B3LYP/def2-TZVPPD  | job_GEO_567 | job_SP_593 | CN_1   | COSMO-BP-TZVPD-FINE_107 |
|                                             | B3LYP/6-311+G(d,p) | JOB_1035    |            | CN_GAU |                         |
| <b>19</b>                                   |                    |             |            |        |                         |
| Anion                                       |                    |             |            |        |                         |
| [CB11(CN)12]-                               | BP86/def-TZVP      | job_GEO_391 | job_SP_396 | CN_3   |                         |
|                                             | B3LYP/def2-TZVPPD  | job_GEO_568 | job_SP_592 | CN_1   | COSMO-BP-TZVPD-FINE_109 |
|                                             | B3LYP/6-311+G(d,p) | JOB_1036    |            | CN_GAU |                         |
| Neutral                                     |                    |             |            |        |                         |
| CB11(CN)12-H, H on CN that is on C          | BP86/def-TZVP      | job_GEO_392 | job_SP_397 | CN_3   |                         |
| CB11(CN)12-H, H on CN that is on 1st row B  | BP86/def-TZVP      | job_GEO_393 | job_SP_398 | CN_3   |                         |
| CB11(CN)12-H, H on CN that is on 2nd row B  | BP86/def-TZVP      | job_GEO_394 | job_SP_399 | CN_3   |                         |
| CB11(CN)12-H, H on CN that is on opposite C | BP86/def-TZVP      | job_GEO_395 | job_SP_400 | CN_3   |                         |
|                                             | B3LYP/def2-TZVPPD  | job_GEO_569 | job_SP_596 | CN_1   | COSMO-BP-TZVPD-FINE_111 |
|                                             | B3LYP/6-311+G(d,p) | JOB_1037    |            | CN_GAU |                         |



**Table S11.** DataDOI data repository filenames of auxiliary acids in the COSMO-RS folder. See <http://dx.doi.org/10.23673/re-436>.

| Compd name                                                               | CAS          |        | FILENAME                |    |                         |
|--------------------------------------------------------------------------|--------------|--------|-------------------------|----|-------------------------|
|                                                                          |              |        | ANION                   |    | NEUTRAL                 |
| NH <sub>2</sub> -TCNP                                                    | 98555-43-2   |        | COSMO-BP-TZVPD-FINE_184 | T4 | COSMO-BP-TZVPD-FINE_186 |
|                                                                          |              |        |                         | T5 | COSMO-BP-TZVPD-FINE_188 |
|                                                                          |              |        |                         | T3 | COSMO-BP-TZVPD-FINE_190 |
| Me-TCNP                                                                  | 24943-63-3   |        | COSMO-BP-TZVPD-FINE_192 | T4 | COSMO-BP-TZVPD-FINE_194 |
|                                                                          |              |        |                         | T5 | COSMO-BP-TZVPD-FINE_196 |
| 3,4-(MeO) <sub>2</sub> -C <sub>6</sub> H <sub>3</sub> -TCNP              | 1261286-75-2 | Conf 1 | COSMO-BP-TZVPD-FINE_198 | T4 | COSMO-BP-TZVPD-FINE_289 |
|                                                                          |              |        |                         | T5 | COSMO-BP-TZVPD-FINE_202 |
|                                                                          |              | Conf 2 |                         | T4 | COSMO-BP-TZVPD-FINE_204 |
|                                                                          |              |        |                         | T5 | COSMO-BP-TZVPD-FINE_304 |
| 4-MeO-C <sub>6</sub> H <sub>4</sub> -TCNP                                | 1261286-76-3 |        | COSMO-BP-TZVPD-FINE_208 | T4 | COSMO-BP-TZVPD-FINE_210 |
|                                                                          |              |        |                         | T5 | COSMO-BP-TZVPD-FINE_212 |
| Ph-TCNP                                                                  | 96463-47-7   |        | COSMO-BP-TZVPD-FINE_214 | T4 | COSMO-BP-TZVPD-FINE_216 |
|                                                                          |              |        |                         | T5 | COSMO-BP-TZVPD-FINE_219 |
| 3-CF <sub>3</sub> -C <sub>6</sub> H <sub>4</sub> -TCNP                   | 2226486-85-5 | Conf 1 | COSMO-BP-TZVPD-FINE_223 | T4 | COSMO-BP-TZVPD-FINE_225 |
|                                                                          |              |        |                         | T5 | COSMO-BP-TZVPD-FINE_227 |
|                                                                          |              | Conf 2 |                         | T4 | COSMO-BP-TZVPD-FINE_229 |
|                                                                          |              |        |                         | T5 | COSMO-BP-TZVPD-FINE_233 |
| H-TCNP                                                                   | 32019-26-4   |        | COSMO-BP-TZVPD-FINE_235 | T3 | COSMO-BP-TZVPD-FINE_237 |
|                                                                          |              |        |                         | T4 | COSMO-BP-TZVPD-FINE_239 |
| Br-TCNP                                                                  | 100125-09-5  |        | COSMO-BP-TZVPD-FINE_243 | T4 | COSMO-BP-TZVPD-FINE_245 |
|                                                                          |              |        |                         | T5 | COSMO-BP-TZVPD-FINE_247 |
| 3,5-(CF <sub>3</sub> ) <sub>2</sub> -C <sub>6</sub> H <sub>3</sub> -TCNP | 1261286-79-6 |        | COSMO-BP-TZVPD-FINE_249 | T4 | COSMO-BP-TZVPD-FINE_251 |
|                                                                          |              |        |                         | T5 | COSMO-BP-TZVPD-FINE_253 |
| Cl-TCNP                                                                  | 1261286-80-9 |        | COSMO-BP-TZVPD-FINE_256 | T4 | COSMO-BP-TZVPD-FINE_258 |
|                                                                          |              |        |                         | T5 | COSMO-BP-TZVPD-FINE_260 |
| CN-CH <sub>2</sub> -TCNP                                                 | 2638-14-4    |        | COSMO-BP-TZVPD-FINE_274 | T4 | COSMO-BP-TZVPD-FINE_276 |
|                                                                          |              |        |                         | T5 | COSMO-BP-TZVPD-FINE_278 |
| CF <sub>3</sub> -TCNP                                                    | 1261286-81-0 |        | COSMO-BP-TZVPD-FINE_221 | T4 | COSMO-BP-TZVPD-FINE_264 |
|                                                                          |              |        | COSMO-BP-TZVPD-FINE_262 | T5 | COSMO-BP-TZVPD-FINE_266 |
